# Supplementary material
Source: PubMed Central journal article supplement (PMC10715848)
Supplement: NIHMS1947987-supplement-1.pdf [file NIHMS1947987-supplement-1.pdf]

# IPOS Online Survey: ENGLISH

This survey aims to gauge current involvement in clinical services and research with cancer patients/survivors and their family caregivers, and to measure unmet needs for providing optimal care to this population across the nation.

To proceed to the next page, please click "Next Page"; and to go to the previous page, please click "Previous Page" buttons at the bottom of each page. Please do NOT use web browser arrows to proceed or go to previous survey pages.

## Section 1: Background Information

Q1. Please think about your typical month at work and write the % of your time and effort you spend for the following group of activities. The total of your time and effort spend for the following five groups should sum to 100. If you are not involved in a given category, please write "0", instead of skipping.

Administration

\_\_\_\_\_ (%)

Administration value

\_\_\_\_\_ (%)

Clinical Work (seeing patients, providing consultation, related paperwork)

\_\_\_\_\_ (%)

Clinical Work (seeing patients, providing consultation, related paperwork)

\_\_\_\_\_ (%)

Research

\_\_\_\_\_ (%)

Research value

\_\_\_\_\_ (%)

Teaching, Supervision, Professional training

\_\_\_\_\_ (%)

Teaching, Supervision, Professional training value

\_\_\_\_\_ (%)

Other

\_\_\_\_\_ (%)

Other value

\_\_\_\_\_ (%)

---

Specify

---

Current Total Value

Numeric values provided above should sum to 100.

(%)

---

The values you provided above does NOT sum to 100. Please make sure total sum equals 100.

---

Thank you for providing values that sum to 100. Please click "Next Page" below if you would like to proceed. If you would like to save and return later, please click "Save & Return Later".

---

Q2. How long have you been engaged in the following activities with respect to cancer patients, survivors, and their family members?

|                   | less than 2 years     | 2-10 years            | 11-20 years           | over 20 years         |
|-------------------|-----------------------|-----------------------|-----------------------|-----------------------|
| Administration    | <input type="radio"/> | <input type="radio"/> | <input type="radio"/> | <input type="radio"/> |
| Clinical Work     | <input type="radio"/> | <input type="radio"/> | <input type="radio"/> | <input type="radio"/> |
| Research          | <input type="radio"/> | <input type="radio"/> | <input type="radio"/> | <input type="radio"/> |
| Teaching          | <input type="radio"/> | <input type="radio"/> | <input type="radio"/> | <input type="radio"/> |
| "[specify_other]" | <input type="radio"/> | <input type="radio"/> | <input type="radio"/> | <input type="radio"/> |

Q3. In a typical month, of the total time you spend with cancer patients and their family members, what proportion of that time falls into each of these subgroups? (Responses below should sum to 100)

If you are not involved in a given category, please write "0", instead of skipping.

0 ~ 14 or 15 years old patients (pediatric group)  
and their family members

\_\_\_\_\_ (%)

0 ~ 14 years old value

\_\_\_\_\_ (%)

15 or 16 ~ 39 years old patients (adolescent and  
young adult group) and their family members

\_\_\_\_\_ (%)

15 - 39 years old value

\_\_\_\_\_ (%)

40 ~ 65 years old patients (middle-age adult group)  
and their family members

\_\_\_\_\_ (%)

40 ~ 65 years old value

\_\_\_\_\_ (%)

older than 65 years old patients (older adult group)  
and their family members

\_\_\_\_\_ (%)

older than 65 years old value

\_\_\_\_\_ (%)

Current Total Value

Numeric values provided above should sum to 100.

\_\_\_\_\_ (%)

The values you provided above does NOT sum to 100. Please make sure total sum equals 100.

Thank you for providing values that sum to 100. Please click "Next Page" below if you would like to proceed. If you would like to save and return later, please click "Save & Return Later".

**Section 2: Patients and Survivors - Age Groups Across Illness Trajectory**

Q4.1. This question asks you how much of your time and effort you spend for cancer patients/survivors who are in different phases of their illness trajectory, such as patients who are (a) recently diagnosed or in treatment, (b) in remission and no longer receiving treatment, or (c) in end-of-life care.

In a typical month of your work that are related to cancer patients/survivors, does the proportion of time and effort you spend with the following groups of patients differ depending on the patients' age group?

For each item below, if the proportion of time and effort you spend differs depending on the age group, select "Yes, proportion differs depending on the age group."

If the proportion of time and effort you spend are the same for all age groups of patients/survivors, select "No, proportion is the same for all age groups." Then write the proportion in the box next to, "Please write the proportion for all age groups."

---

Cancer patients/survivors who are recently diagnosed or in treatment

- Yes, proportion differs depending on the age group  
 No, proportion is the same for all age groups

---

Please write the proportion for all age groups

\_\_\_\_\_ (%)

---

Cancer patients/survivors who are off treatment (in remission)

- Yes, proportion differs depending on the age group  
 No, proportion is the same for all age groups

---

Please write the proportion for all age groups

\_\_\_\_\_ (%)

---

Cancer patients/survivors who are in end-of-life care

- Yes, proportion differs depending on the age group  
 No, proportion is the same for all age groups

---

Please write the proportion for all age groups

\_\_\_\_\_ (%)

---

Q4.2. A. In a typical month of your work that are related to cancer patients/survivors, what proportion of that time and effort do you spend with cancer patients who are recently diagnosed or in treatment in the following age groups?

Please select the age group(s) which applies to write the percentage of time and effort you spend in a typical month for that age group you work with.

---

0 ~ 14 or 15 years old patients (pediatric group)

\_\_\_\_\_ (%)

---

15 or 16 ~ 39 years old patients (adolescent and young adult group)

\_\_\_\_\_ (%)

---

40 ~ 65 years old patients (middle-aged adult group)

\_\_\_\_\_ (%)

---

older than 65 years old patients (older adult group)

\_\_\_\_\_ (%)

---

Q4.2. B. In a typical month of your work that are related to cancer patients/survivors, what proportion of that time and effort do you spend with cancer patients who are in remission and no longer receiving treatment in the following age groups?

Please select the age group(s) which applies to write the percentage of time and effort you spend in a typical month for that age group you work with.

---

0 ~ 14 or 15 years old patients (pediatric group)

\_\_\_\_\_ (%)

---

15 or 16 ~ 39 years old patients (adolescent and young adult group)

\_\_\_\_\_ (%)

---

40 ~ 65 years old patients (middle-aged adult group)

\_\_\_\_\_ (%)

---

older than 65 years old patients (older adult group)

\_\_\_\_\_ (%)

---

Q4.2.C. In a typical month of your work that are related to cancer patients/survivors, what proportion of that time and effort do you spend with cancer patients who are in end-of-life care in the following age groups?

Please select the age group(s) which applies to write the percentage of time and effort you spend in a typical month for that age group you work with.

---

0 ~ 14 or 15 years old patients (pediatric group)

\_\_\_\_\_ (%)

---

15 or 16 ~ 39 years old patients (adolescent and young adult group)

\_\_\_\_\_ (%)

---

40 ~ 65 years old patients (middle-aged adult group)

\_\_\_\_\_ (%)

---

older than 65 years old patients (older adult group)

\_\_\_\_\_ (%)



**Section 3: Patients and Survivors - Understanding Their Concerns**

The next couple of questions are to learn about your patients' concerns.

- Skip
- Continue or Next

If you do wish to skip this section, please select "Skip" in the right column, then click "Next Page" in the bottom of this page, which will bring you to the next section of the survey.

If you want to continue to the patients' concerns, please select "Continue" in the right column, then click "Next Page" in the bottom of this page, which will bring you to the next question.

**Q5.1. In your work with cancer patients or survivors, please indicate that the patients' concerns below are either applicable for all age groups you are working with, applicable to none of those age groups, or whether your response would vary depending on the patients' age group (pediatric, vs adolescent and young adult, vs middle aged adult, vs older adult).**

|                                                                                                            | Applicable for all age groups | Not Applicable for any age groups | It depends on the age group |
|------------------------------------------------------------------------------------------------------------|-------------------------------|-----------------------------------|-----------------------------|
| Emotional distress                                                                                         | <input type="radio"/>         | <input type="radio"/>             | <input type="radio"/>       |
| Finding meaning, spiritual concerns                                                                        | <input type="radio"/>         | <input type="radio"/>             | <input type="radio"/>       |
| Family relationships (communication problems, conflict management, concerns about children or adolescents) | <input type="radio"/>         | <input type="radio"/>             | <input type="radio"/>       |
| Sexuality, intimacy                                                                                        | <input type="radio"/>         | <input type="radio"/>             | <input type="radio"/>       |
| Social relationships/isolation                                                                             | <input type="radio"/>         | <input type="radio"/>             | <input type="radio"/>       |
| Medical care related to cancer                                                                             | <input type="radio"/>         | <input type="radio"/>             | <input type="radio"/>       |
| Cancer-related symptom management                                                                          | <input type="radio"/>         | <input type="radio"/>             | <input type="radio"/>       |
| Physical functioning decline                                                                               | <input type="radio"/>         | <input type="radio"/>             | <input type="radio"/>       |
| Cognitive functioning decline                                                                              | <input type="radio"/>         | <input type="radio"/>             | <input type="radio"/>       |
| Insomnia, sleep difficulty, fatigue                                                                        | <input type="radio"/>         | <input type="radio"/>             | <input type="radio"/>       |
| Financial concern related to cancer care                                                                   | <input type="radio"/>         | <input type="radio"/>             | <input type="radio"/>       |
| Personal care for daily living                                                                             | <input type="radio"/>         | <input type="radio"/>             | <input type="radio"/>       |
| Balancing other social roles with a new role as a patient                                                  | <input type="radio"/>         | <input type="radio"/>             | <input type="radio"/>       |
| Something else not listed?                                                                                 | <input type="radio"/>         | <input type="radio"/>             | <input type="radio"/>       |

(If not, click "Not Applicable for any group". If so, click either "Applicable for all age groups" or "It depends on the age group". Then, you will be asked to write what it is.)

Please specify what "something else" is \_\_\_\_\_

|                                       | Applicable for all age groups | Not Applicable for any age groups | It depends on the age group |
|---------------------------------------|-------------------------------|-----------------------------------|-----------------------------|
| Additional something else not listed? | <input type="radio"/>         | <input type="radio"/>             | <input type="radio"/>       |

(First choose if this is applicable to any age group. Then, you will be asked to write what it is.)

Please specify what "something else" is \_\_\_\_\_

---

|                            |                               |                                   |                             |
|----------------------------|-------------------------------|-----------------------------------|-----------------------------|
|                            | Applicable for all age groups | Not Applicable for any age groups | It depends on the age group |
| Something else not listed? | <input type="radio"/>         | <input type="radio"/>             | <input type="radio"/>       |

(First choose if this is applicable to any age group. Then, you will be asked to write what it is.)

---

Please specify what "something else" is

\_\_\_\_\_

---

|                            |                               |                                   |                             |
|----------------------------|-------------------------------|-----------------------------------|-----------------------------|
|                            | Applicable for all age groups | Not Applicable for any age groups | It depends on the age group |
| Something else not listed? | <input type="radio"/>         | <input type="radio"/>             | <input type="radio"/>       |

(First choose if this is applicable to any age group. Then, you will be asked to write what it is.)

---

Please specify what "something else" is

\_\_\_\_\_

---

|                            |                               |                                   |                             |
|----------------------------|-------------------------------|-----------------------------------|-----------------------------|
|                            | Applicable for all age groups | Not Applicable for any age groups | It depends on the age group |
| Something else not listed? | <input type="radio"/>         | <input type="radio"/>             | <input type="radio"/>       |

(First choose if this is applicable to any age group. Then, you will be asked to write what it is.)

---

Please specify what "something else" is

\_\_\_\_\_

**Q5.2. Now, please think about how much time and effort you spend in a typical month to address the following concerns of cancer patients/survivors. Does proportion of time and effort you spend in a typical month to address the following concerns differ depending on the patients' age group?**

**For each item below, if the proportion of time and effort you spend differs depending on the age group, select "Yes, proportion differs depending on the age group."**

**If the proportion of time and effort you spend are the same for all age groups of patients/survivors, select "No, proportion is the same for all age groups." Then, write the proportion in the box next to, "Please write the proportion for all age groups."**

**If any concern is applicable but you do not spend any time and effort on that concern, please write "0".**

Emotional distress

- Yes, proportion differs depending on the age group  
 No, proportion is the same for all age groups

Please write the proportion for all age groups

\_\_\_\_\_ (%)

Finding meaning, spiritual concerns

- Yes, proportion differs depending on the age group  
 No, proportion is the same for all age groups

Please write the proportion for all age groups

\_\_\_\_\_ (%)

Family relationships (communication problems, conflict management, concerns about children or adolescents)

- Yes, proportion differs depending on the age group  
 No, proportion is the same for all age groups

Please write the proportion for all age groups

\_\_\_\_\_ (%)

Sexuality, intimacy

- Yes, proportion differs depending on the age group  
 No, proportion is the same for all age groups

Please write the proportion for all age groups

\_\_\_\_\_ (%)

Social relationships/isolation

- Yes, proportion differs depending on the age group  
 No, proportion is the same for all age groups

Please write the proportion for all age groups

\_\_\_\_\_ (%)

Medical care related to cancer

- Yes, proportion differs depending on the age group  
 No, proportion is the same for all age groups

---

Please write the proportion for all age groups

---

(%)

---

Cancer-related symptom management

- Yes, proportion differs depending on the age group  
 No, proportion is the same for all age groups

---

Please write the proportion for all age groups

---

(%)

---

Physical functioning decline

- Yes, proportion differs depending on the age group  
 No, proportion is the same for all age groups

---

Please write the proportion for all age groups

---

(%)

---

Cognitive functioning decline

- Yes, proportion differs depending on the age group  
 No, proportion is the same for all age groups

---

Please write the proportion for all age groups

---

(%)

---

Insomnia, sleep difficulty, fatigue

- Yes, proportion differs depending on the age group  
 No, proportion is the same for all age groups

---

Please write the proportion for all age groups

---

(%)

---

Financial concern related to cancer care

- Yes, proportion differs depending on the age group  
 No, proportion is the same for all age groups

---

Please write the proportion for all age groups

---

(%)

---

Personal care for daily living

- Yes, proportion differs depending on the age group  
 No, proportion is the same for all age groups

---

Please write the proportion for all age groups

---

(%)

---

Balancing other social roles with a new role as a patient

- Yes, proportion differs depending on the age group  
 No, proportion is the same for all age groups

---

Please write the proportion for all age groups

---

(%)

---

"[q5\_1an1]"

- Yes, proportion differs depending on the age group  
 No, proportion is the same for all age groups

---

Please write the proportion for all age groups

\_\_\_\_\_

(%)

---

"[q5\_1ao1]"

- Yes, proportion differs depending on the age group
- No, proportion is the same for all age groups

---

Please write the proportion for all age groups

\_\_\_\_\_

(%)

---

"[q5\_1ap1]"

- Yes, proportion differs depending on the age group
- No, proportion is the same for all age groups

---

Please write the proportion for all age groups

\_\_\_\_\_

(%)

---

"[q5\_1aq1]"

- Yes, proportion differs depending on the age group
- No, proportion is the same for all age groups

---

Please write the proportion for all age groups

\_\_\_\_\_

(%)

---

"[q5\_1ar1]"

- Yes, proportion differs depending on the age group
- No, proportion is the same for all age groups

---

Please write the proportion for all age groups

\_\_\_\_\_

**Q5.3. In your work with cancer patients and survivors who are in different age groups, please write the percentage of time and effort you spend in a typical month to address each concern for the patients' age group.**

**If you do not spend any time and effort on that concern for that age group, please write "0".**

Emotional distress for 0 ~ 14 or 15 years old  
(pediatric)

\_\_\_\_\_ (%)

Emotional distress for 15 or 16 ~ 39 years old  
(adolescent/young adult)

\_\_\_\_\_ (%)

Emotional distress for 40 ~ 65 years old (middle-aged  
adult)

\_\_\_\_\_ (%)

Emotional distress for older than 65 years old (older  
adult)

\_\_\_\_\_ (%)

Finding meaning, spiritual concerns for 0 ~ 14 or 15  
years old (pediatric)

\_\_\_\_\_ (%)

Finding meaning, spiritual concerns for 15 or 16 ~ 39  
years old (adolescent/young adult)

\_\_\_\_\_ (%)

Finding meaning, spiritual concerns for 40 ~ 65 years  
old (middle-aged adult)

\_\_\_\_\_ (%)

Finding meaning, spiritual concerns for older than 65  
years old (older adult)

\_\_\_\_\_ (%)

Family relationships (communication problems,  
conflict management, concerns about children or  
adolescents) for 0 ~ 14 or 15 years old (pediatric)

\_\_\_\_\_ (%)

Family relationships (communication problems,  
conflict management, concerns about children or  
adolescents) for 15 or 16 ~ 39 years old  
(adolescent/young adult)

\_\_\_\_\_ (%)

Family relationships (communication problems,  
conflict management, concerns about children or  
adolescents) for 40 ~ 65 years old (middle-aged adult)

\_\_\_\_\_ (%)

Family relationships (communication problems,  
conflict management, concerns about children or  
adolescents) for older than 65 years old (older adult)

\_\_\_\_\_ (%)

---

Sexuality, intimacy for 0 ~ 14 or 15 years old  
(pediatric)

---

(%)

---

Sexuality, intimacy for 15 or 16 ~ 39 years old  
(adolescent/young adult)

---

(%)

---

Sexuality, intimacy for 40 ~ 65 years old  
(middle-aged adult)

---

(%)

---

Sexuality, intimacy for older than 65 years old  
(older adult)

---

(%)

---

Social relationships/isolation for 0 ~ 14 or 15 years  
old (pediatric)

---

(%)

---

Social relationships/isolation for 15 or 16 ~ 39  
years old (adolescent/young adult)

---

(%)

---

Social relationships/isolation for 40 ~ 65 years old  
(middle-aged adult)

---

(%)

---

Social relationships/isolation for older than 65  
years old (older adult)

---

(%)

---

Medical care related to cancer for 0 ~ 14 or 15 years  
old (pediatric)

---

(%)

---

Medical care related to cancer for 15 or 16 ~ 39  
years old (adolescent/young adult)

---

(%)

---

Medical care related to cancer for 40 ~ 65 years old  
(middle-aged adult)

---

(%)

---

Medical care related to cancer for older than 65  
years old (older adult)

---

(%)

---

Cancer-related symptom management for 0 ~ 14 or 15  
years old (pediatric)

---

(%)

---

Cancer-related symptom management for 15 or 16 ~ 39  
years old (adolescent/young adult)

---

(%)

---



---

Cancer-related symptom management for 40 ~ 65 years old (middle-aged adult)

---

(%)

---

Cancer-related symptom management for older than 65 years old (older adult)

---

(%)

---

Physical functioning decline for 0 ~ 14 or 15 years old (pediatric)

---

(%)

---

Physical functioning decline for 15 or 16 ~ 39 years old (adolescent/young adult)

---

(%)

---

Physical functioning decline for 40 ~ 65 years old (middle-aged adult)

---

(%)

---

Physical functioning decline for older than 65 years old (older adult)

---

(%)

---

Cognitive functioning decline for 0 ~ 14 or 15 years old (pediatric)

---

(%)

---

Cognitive functioning decline for 15 or 16 ~ 39 years old (adolescent/young adult)

---

(%)

---

Cognitive functioning decline for 40 ~ 65 years old (middle-aged adult)

---

(%)

---

Cognitive functioning decline for older than 65 years old (older adult)

---

(%)

---

Insomnia, sleep difficulty, fatigue for 0 ~ 14 or 15 years old (pediatric)

---

(%)

---

Insomnia, sleep difficulty, fatigue for 15 or 16 ~ 39 years old (adolescent/young adult)

---

(%)

---

Insomnia, sleep difficulty, fatigue for 40 ~ 65 years old (middle-aged adult)

---

(%)

---

Insomnia, sleep difficulty, fatigue for older than 65 years old (older adult)

---

(%)

---

---

Financial concern related to cancer care for 0 ~ 14  
or 15 years old (pediatric)

---

(%)

---

Financial concern related to cancer care for 15 or 16  
~ 39 years old (adolescent/young adult)

---

(%)

---

Financial concern related to cancer care for 40 ~ 65  
years old (middle-aged adult)

---

(%)

---

Financial concern related to cancer care for older  
than 65 years old (older adult)

---

(%)

---

Personal care for daily living for 0 ~ 14 or 15 years  
old (pediatric)

---

(%)

---

Personal care for daily living for 15 or 16 ~ 39  
years old (adolescent/young adult)

---

(%)

---

Personal care for daily living for 40 ~ 65 years old  
(middle-aged adult)

---

(%)

---

Personal care for daily living for older than 65  
years old (older adult)

---

(%)

---

Balancing other social roles with a new role as a  
patient for 0 ~ 14 or 15 years old (pediatric)

---

(%)

---

Balancing other social roles with a new role as a  
patient for 15 or 16 ~ 39 years old  
(adolescent/young adult)

---

(%)

---

Balancing other social roles with a new role as a  
patient for 40 ~ 65 years old (middle-aged adult)

---

(%)

---

Balancing other social roles with a new role as a  
patient for older than 65 years old (older adult)

---

(%)

---

"[q5\_1an1]" for 0 ~ 14 or 15 years old (pediatric)

---

(%)

---

"[q5\_1an1]" for 15 or 16 ~ 39 years old  
(adolescent/young adult)

---

(%)

---

---

"[q5\_1an1]" for 40 ~ 65 years old (middle-aged adult)

---

(%)

---

"[q5\_1an1]" for older than 65 years old (older adult)

---

(%)

---

"[q5\_1ao1]" for 0 ~ 14 or 15 years old (pediatric)

---

(%)

---

"[q5\_1ao1]" for 15 or 16 ~ 39 years old  
(adolescent/young adult)

---

(%)

---

"[q5\_1ao1]" for 40 ~ 65 years old (middle-aged adult)

---

(%)

---

"[q5\_1ao1]" for older than 65 years old (older adult)

---

(%)

---

"[q5\_1ap1]" for 0 ~ 14 or 15 years old (pediatric)

---

(%)

---

"[q5\_1ap1]" for 15 or 16 ~ 39 years old  
(adolescent/young adult)

---

(%)

---

"[q5\_1ap1]" for 40 ~ 65 years old (middle-aged adult)

---

(%)

---

"[q5\_1ap1]" for older than 65 years old (older adult)

---

(%)

---

"[q5\_1aq1]" for 0 ~ 14 or 15 years old (pediatric)

---

(%)

---

"[q5\_1aq1]" for 15 or 16 ~ 39 years old  
(adolescent/young adult)

---

(%)

---

"[q5\_1aq1]" for 40 ~ 65 years old (middle-aged adult)

---

(%)

---

"[q5\_1aq1]" for older than 65 years old (older adult)

---

(%)

---

---

"[q5\_1ar1]" for 0 ~ 14 or 15 years old (pediatric)

---

(%)

---

"[q5\_1ar1]" for 15 or 16 ~ 39 years old  
(adolescent/young adult)

---

(%)

---

"[q5\_1ar1]" for 40 ~ 65 years old (middle-aged adult)

---

(%)

---

"[q5\_1ar1]" for older than 65 years old (older adult)

---

(%)

**Q6.1. Now we are asking your opinion about the concerns of patients/survivors being addressed properly or the needs of patients/survivors being met. First, please evaluate if the degree to which you think each of the concerns of patients/survivors is addressed properly or the need is met, differs depending on the patients' age group.**

**For each item below, if the degree that the concern being addressed or the need being met differs depending on the age group, select "Yes, the degree differs depending on age group."**

**If the degree that the concern is being addressed or the need being met is the same for all age groups of patients/survivors, select "No, the degree is the same for all age groups." Then, write the degree in the box next to, "Please write the degree for all age groups." For each concern, use a scale from 100 (the concern is completely addressed; the need is fully being met) to 0 (the concern is completely unaddressed; the need is not being met at all).**

Emotional distress  Yes, degree differs depending on the age group  
 No, degree is the same for all age groups

Please write the degree for all age groups \_\_\_\_\_

Finding meaning, spiritual concerns  Yes, degree differs depending on the age group  
 No, degree is the same for all age groups

Please write the degree for all age groups \_\_\_\_\_

Family relationships (communication problems, conflict management, concerns about children or adolescents)  Yes, degree differs depending on the age group  
 No, degree is the same for all age groups

Please write the degree for all age groups \_\_\_\_\_

Sexuality, intimacy  Yes, degree differs depending on the age group  
 No, degree is the same for all age groups

Please write the degree for all age groups \_\_\_\_\_

Social relationships/isolation  Yes, degree differs depending on the age group  
 No, degree is the same for all age groups

Please write the degree for all age groups \_\_\_\_\_

Medical care related to cancer  Yes, degree differs depending on the age group  
 No, degree is the same for all age groups

Please write the degree for all age groups \_\_\_\_\_

Cancer-related symptom management  Yes, degree differs depending on the age group  
 No, degree is the same for all age groups

---

Please write the degree for all age groups

---

Physical functioning decline

- Yes, degree differs depending on the age group  
 No, degree is the same for all age groups

---

Please write the degree for all age groups

---

Cognitive functioning decline

- Yes, degree differs depending on the age group  
 No, degree is the same for all age groups

---

Please write the degree for all age groups

---

Insomnia, sleep difficulty, fatigue

- Yes, degree differs depending on the age group  
 No, degree is the same for all age groups

---

Please write the degree for all age groups

---

Financial concern related to cancer care

- Yes, degree differs depending on the age group  
 No, degree is the same for all age groups

---

Please write the degree for all age groups

---

Personal care for daily living

- Yes, degree differs depending on the age group  
 No, degree is the same for all age groups

---

Please write the degree for all age groups

---

Balancing other social roles with a new role as a patient

- Yes, degree differs depending on the age group  
 No, degree is the same for all age groups

---

Please write the degree for all age groups

---

"[q5\_1an1]"

- Yes, degree differs depending on the age group  
 No, degree is the same for all age groups

---

Please write the degree for all age groups

---

"[q5\_1ao1]"

- Yes, degree differs depending on the age group  
 No, degree is the same for all age groups

---

Please write the degree for all age groups

---

"[q5\_1ap1]"

- Yes, degree differs depending on the age group  
 No, degree is the same for all age groups

---

Please write the degree for all age groups

\_\_\_\_\_

---

"[q5\_1aq1]"

- Yes, degree differs depending on the age group
- No, degree is the same for all age groups

---

Please write the degree for all age groups

\_\_\_\_\_

---

"[q5\_1ar1]"

- Yes, degree differs depending on the age group
- No, degree is the same for all age groups

---

Please write the degree for all age groups

\_\_\_\_\_

**Q6.2. In your work with cancer patients and survivors who are in different age groups, please write the degree to which you think each concern is addressed properly, or the need is met. For each concern, use a scale from 100 (the concern is completely addressed; the need is fully being met) to 0 (the concern is completely unaddressed; the need is not being met at all).**

Emotional distress for 0 ~ 14 or 15 years old  
(pediatric)

\_\_\_\_\_ (%)

Emotional distress for 15 or 16 ~ 39 years old  
(adolescent/young adult)

\_\_\_\_\_ (%)

Emotional distress for 40 ~ 65 years old (middle-aged  
adult)

\_\_\_\_\_ (%)

Emotional distress for older than 65 years old (older  
adult)

\_\_\_\_\_ (%)

Finding meaning, spiritual concerns for 0 ~ 14 or 15  
years old (pediatric)

\_\_\_\_\_ (%)

Finding meaning, spiritual concerns for 15 or 16 ~ 39  
years old (adolescent/young adult)

\_\_\_\_\_ (%)

Finding meaning, spiritual concerns for 40 ~ 65 years  
old (middle-aged adult)

\_\_\_\_\_ (%)

Finding meaning, spiritual concerns for older than 65  
years old (older adult)

\_\_\_\_\_ (%)

Family relationships (communication problems,  
conflict management, concerns about children or  
adolescents) for 0 ~ 14 or 15 years old (pediatric)

\_\_\_\_\_ (%)

Family relationships (communication problems,  
conflict management, concerns about children or  
adolescents) for 15 or 16 ~ 39 years old  
(adolescent/young adult)

\_\_\_\_\_ (%)

Family relationships (communication problems,  
conflict management, concerns about children or  
adolescents) for 40 ~ 65 years old (middle-aged adult)

\_\_\_\_\_ (%)

Family relationships (communication problems,  
conflict management, concerns about children or  
adolescents) for older than 65 years old (older adult)

\_\_\_\_\_ (%)

Sexuality, intimacy for 0 ~ 14 or 15 years old  
(pediatric)

\_\_\_\_\_ (%)



---

Sexuality, intimacy for 15 or 16 ~ 39 years old  
(adolescent/young adult)

---

(%)

---

Sexuality, intimacy for 40 ~ 65 years old  
(middle-aged adult)

---

(%)

---

Sexuality, intimacy for older than 65 years old  
(older adult)

---

(%)

---

Social relationships/isolation for 0 ~ 14 or 15 years  
old (pediatric)

---

(%)

---

Social relationships/isolation for 15 or 16 ~ 39  
years old (adolescent/young adult)

---

(%)

---

Social relationships/isolation for 40 ~ 65 years old  
(middle-aged adult)

---

(%)

---

Social relationships/isolation for older than 65  
years old (older adult)

---

(%)

---

Medical care related to cancer for 0 ~ 14 or 15 years  
old (pediatric)

---

(%)

---

Medical care related to cancer for 15 or 16 ~ 39  
years old (adolescent/young adult)

---

(%)

---

Medical care related to cancer for 40 ~ 65 years old  
(middle-aged adult)

---

(%)

---

Medical care related to cancer for older than 65  
years old (older adult)

---

(%)

---

Cancer-related symptom management for 0 ~ 14 or 15  
years old (pediatric)

---

(%)

---

Cancer-related symptom management for 15 or 16 ~ 39  
years old (adolescent/young adult)

---

(%)

---

Cancer-related symptom management for 40 ~ 65 years  
old (middle-aged adult)

---

(%)

---

---

Cancer-related symptom management for older than 65 years old (older adult)

---

(%)

---

Physical functioning decline for 0 ~ 14 or 15 years old (pediatric)

---

(%)

---

Physical functioning decline for 15 or 16 ~ 39 years old (adolescent/young adult)

---

(%)

---

Physical functioning decline for 40 ~ 65 years old (middle-aged adult)

---

(%)

---

Physical functioning decline for older than 65 years old (older adult)

---

(%)

---

Cognitive functioning decline for 0 ~ 14 or 15 years old (pediatric)

---

(%)

---

Cognitive functioning decline for 15 or 16 ~ 39 years old (adolescent/young adult)

---

(%)

---

Cognitive functioning decline for 40 ~ 65 years old (middle-aged adult)

---

(%)

---

Cognitive functioning decline for older than 65 years old (older adult)

---

(%)

---

Insomnia, sleep difficulty, fatigue for 0 ~ 14 or 15 years old (pediatric)

---

(%)

---

Insomnia, sleep difficulty, fatigue for 15 or 16 ~ 39 years old (adolescent/young adult)

---

(%)

---

Insomnia, sleep difficulty, fatigue for 40 ~ 65 years old (middle-aged adult)

---

(%)

---

Insomnia, sleep difficulty, fatigue for older than 65 years old (older adult)

---

(%)

---

Financial concern related to cancer care for 0 ~ 14 or 15 years old (pediatric)

---

(%)

---

---

Financial concern related to cancer care for 15 or 16  
~ 39 years old (adolescent/young adult)

---

(%)

---

Financial concern related to cancer care for 40 ~ 65  
years old (middle-aged adult)

---

(%)

---

Financial concern related to cancer care for older  
than 65 years old (older adult)

---

(%)

---

Personal care for daily living for 0 ~ 14 or 15 years  
old (pediatric)

---

(%)

---

Personal care for daily living for 15 or 16 ~ 39  
years old (adolescent/young adult)

---

(%)

---

Personal care for daily living for 40 ~ 65 years old  
(middle-aged adult)

---

(%)

---

Personal care for daily living for older than 65  
years old (older adult)

---

(%)

---

Balancing other social roles with a new role as a  
patient for 0 ~ 14 or 15 years old (pediatric)

---

(%)

---

Balancing other social roles with a new role as a  
patient for 15 or 16 ~ 39 years old  
(adolescent/young adult)

---

(%)

---

Balancing other social roles with a new role as a  
patient for 40 ~ 65 years old (middle-aged adult)

---

(%)

---

Balancing other social roles with a new role as a  
patient for older than 65 years old (older adult)

---

(%)

---

"[q5\_1an1]" for 0 ~ 14 or 15 years old (pediatric)

---

(%)

---

"[q5\_1an1]" for 15 or 16 ~ 39 years old  
(adolescent/young adult)

---

(%)

---

"[q5\_1an1]" for 40 ~ 65 years old (middle-aged adult)

---

(%)

---

---

"[q5\_1an1]" for older than 65 years old (older adult)

---

(%)

---

"[q5\_1ao1]" for 0 ~ 14 or 15 years old (pediatric)

---

(%)

---

"[q5\_1ao1]" for 15 or 16 ~ 39 years old  
(adolescent/young adult)

---

(%)

---

"[q5\_1ao1]" for 40 ~ 65 years old (middle-aged adult)

---

(%)

---

"[q5\_1ao1]" for older than 65 years old (older adult)

---

(%)

---

"[q5\_1ap1]" for 0 ~ 14 or 15 years old (pediatric)

---

(%)

---

"[q5\_1ap1]" for 15 or 16 ~ 39 years old  
(adolescent/young adult)

---

(%)

---

"[q5\_1ap1]" for 40 ~ 65 years old (middle-aged adult)

---

(%)

---

"[q5\_1ap1]" for older than 65 years old (older adult)

---

(%)

---

"[q5\_1aq1]" for 0 ~ 14 or 15 years old (pediatric)

---

(%)

---

"[q5\_1aq1]" for 15 or 16 ~ 39 years old  
(adolescent/young adult)

---

(%)

---

"[q5\_1aq1]" for 40 ~ 65 years old (middle-aged adult)

---

(%)

---

"[q5\_1aq1]" for older than 65 years old (older adult)

---

(%)

---

"[q5\_1ar1]" for 0 ~ 14 or 15 years old (pediatric)

---

(%)

---

---

"[q5\_1ar1]" for 15 or 16 ~ 39 years old  
(adolescent/young adult)

\_\_\_\_\_  
(%)

---

"[q5\_1ar1]" for 40 ~ 65 years old (middle-aged adult)

\_\_\_\_\_  
(%)

---

"[q5\_1ar1]" for older than 65 years old (older adult)

\_\_\_\_\_  
(%)

**Section 4: Patients and Survivors - Support Programs**

The next couple of questions are to learn about programs or services designed to address the patients'/survivors' concerns that you or your institution are providing.

- Skip
- Continue or Next

If you do wish to skip this section, please select "Skip" and click "Next Page", which will bring you to the next section of the survey.

If you want to continue to the program/service questions, please select "Continue or Next" and click "Next Page," which will bring you to the next question.

**Q7.1. Do you or your institution systematically assess each of the concerns below for cancer patients or survivors? By "systematically assess" we mean that there is a routine process for screening or inquiring about these issues for each patient.**

- |                                                                                                            |                                                                                                                                                                                                                                                                                              |
|------------------------------------------------------------------------------------------------------------|----------------------------------------------------------------------------------------------------------------------------------------------------------------------------------------------------------------------------------------------------------------------------------------------|
| Emotional distress                                                                                         | <input type="radio"/> Yes, this concern is systematically assessed for all age groups<br><input type="radio"/> Yes, but systematic assessment varies depending on the age group<br><input type="radio"/> No, the concern is not systematically assessed<br><input type="radio"/> Do not know |
| Finding meaning, spiritual concerns                                                                        | <input type="radio"/> Yes, this concern is systematically assessed for all age groups<br><input type="radio"/> Yes, but systematic assessment varies depending on the age group<br><input type="radio"/> No, the concern is not systematically assessed<br><input type="radio"/> Do not know |
| Family relationships (communication problems, conflict management, concerns about children or adolescents) | <input type="radio"/> Yes, this concern is systematically assessed for all age groups<br><input type="radio"/> Yes, but systematic assessment varies depending on the age group<br><input type="radio"/> No, the concern is not systematically assessed<br><input type="radio"/> Do not know |
| Sexuality, intimacy                                                                                        | <input type="radio"/> Yes, this concern is systematically assessed for all age groups<br><input type="radio"/> Yes, but systematic assessment varies depending on the age group<br><input type="radio"/> No, the concern is not systematically assessed<br><input type="radio"/> Do not know |
| Social relationship/isolation                                                                              | <input type="radio"/> Yes, this concern is systematically assessed for all age groups<br><input type="radio"/> Yes, but systematic assessment varies depending on the age group<br><input type="radio"/> No, the concern is not systematically assessed<br><input type="radio"/> Do not know |
| Medical care related to cancer                                                                             | <input type="radio"/> Yes, this concern is systematically assessed for all age groups<br><input type="radio"/> Yes, but systematic assessment varies depending on the age group<br><input type="radio"/> No, the concern is not systematically assessed<br><input type="radio"/> Do not know |
| Cancer-related Symptom management                                                                          | <input type="radio"/> Yes, this concern is systematically assessed for all age groups<br><input type="radio"/> Yes, but systematic assessment varies depending on the age group<br><input type="radio"/> No, the concern is not systematically assessed<br><input type="radio"/> Do not know |
| Physical functioning decline                                                                               | <input type="radio"/> Yes, this concern is systematically assessed for all age groups<br><input type="radio"/> Yes, but systematic assessment varies depending on the age group<br><input type="radio"/> No, the concern is not systematically assessed<br><input type="radio"/> Do not know |

---

|                                                           |                                                                                                                                                                                                                                                                                              |
|-----------------------------------------------------------|----------------------------------------------------------------------------------------------------------------------------------------------------------------------------------------------------------------------------------------------------------------------------------------------|
| Cognitive functioning decline                             | <input type="radio"/> Yes, this concern is systematically assessed for all age groups<br><input type="radio"/> Yes, but systematic assessment varies depending on the age group<br><input type="radio"/> No, the concern is not systematically assessed<br><input type="radio"/> Do not know |
| Insomnia, sleep difficulty, fatigue                       | <input type="radio"/> Yes, this concern is systematically assessed for all age groups<br><input type="radio"/> Yes, but systematic assessment varies depending on the age group<br><input type="radio"/> No, the concern is not systematically assessed<br><input type="radio"/> Do not know |
| Financial concern related to cancer care                  | <input type="radio"/> Yes, this concern is systematically assessed for all age groups<br><input type="radio"/> Yes, but systematic assessment varies depending on the age group<br><input type="radio"/> No, the concern is not systematically assessed<br><input type="radio"/> Do not know |
| Personal care for daily living                            | <input type="radio"/> Yes, this concern is systematically assessed for all age groups<br><input type="radio"/> Yes, but systematic assessment varies depending on the age group<br><input type="radio"/> No, the concern is not systematically assessed<br><input type="radio"/> Do not know |
| Balancing other social roles with a new role as a patient | <input type="radio"/> Yes, this concern is systematically assessed for all age groups<br><input type="radio"/> Yes, but systematic assessment varies depending on the age group<br><input type="radio"/> No, the concern is not systematically assessed<br><input type="radio"/> Do not know |
| "[q5_1an1]"                                               | <input type="radio"/> Yes, this concern is systematically assessed for all age groups<br><input type="radio"/> Yes, but systematic assessment varies depending on the age group<br><input type="radio"/> No, the concern is not systematically assessed<br><input type="radio"/> Do not know |
| "[q5_1ao1]"                                               | <input type="radio"/> Yes, this concern is systematically assessed for all age groups<br><input type="radio"/> Yes, but systematic assessment varies depending on the age group<br><input type="radio"/> No, the concern is not systematically assessed<br><input type="radio"/> Do not know |
| "[q5_1ap1]"                                               | <input type="radio"/> Yes, this concern is systematically assessed for all age groups<br><input type="radio"/> Yes, but systematic assessment varies depending on the age group<br><input type="radio"/> No, the concern is not systematically assessed<br><input type="radio"/> Do not know |

---



---

"[q5\_1aq1]"

- Yes, this concern is systematically assessed for all age groups
  - Yes, but systematic assessment varies depending on the age group
  - No, the concern is not systematically assessed
  - Do not know
- 

"[q5\_1ar1]"

- Yes, this concern is systematically assessed for all age groups
- Yes, but systematic assessment varies depending on the age group
- No, the concern is not systematically assessed
- Do not know

**Q7.2. Now please check (✓) the box for the age group(s) for which you or your institution systematically assesses the concerns below.**

|                                                                                                            |                                                                                                                                                                                                                                                                              |
|------------------------------------------------------------------------------------------------------------|------------------------------------------------------------------------------------------------------------------------------------------------------------------------------------------------------------------------------------------------------------------------------|
| Emotional distress                                                                                         | <input type="checkbox"/> 0 ~ 14 or 15 years old (pediatric)<br><input type="checkbox"/> 15 or 16 ~ 39 years old (adolescent/young adult)<br><input type="checkbox"/> 40 ~ 65 years old (middle-aged adult)<br><input type="checkbox"/> older than 65 years old (older adult) |
| Finding meaning, spiritual concerns                                                                        | <input type="checkbox"/> 0 ~ 14 or 15 years old (pediatric)<br><input type="checkbox"/> 15 or 16 ~ 39 years old (adolescent/young adult)<br><input type="checkbox"/> 40 ~ 65 years old (middle-aged adult)<br><input type="checkbox"/> older than 65 years old (older adult) |
| Family relationships (communication problems, conflict management, concerns about children or adolescents) | <input type="checkbox"/> 0 ~ 14 or 15 years old (pediatric)<br><input type="checkbox"/> 15 or 16 ~ 39 years old (adolescent/young adult)<br><input type="checkbox"/> 40 ~ 65 years old (middle-aged adult)<br><input type="checkbox"/> older than 65 years old (older adult) |
| Sexuality, intimacy                                                                                        | <input type="checkbox"/> 0 ~ 14 or 15 years old (pediatric)<br><input type="checkbox"/> 15 or 16 ~ 39 years old (adolescent/young adult)<br><input type="checkbox"/> 40 ~ 65 years old (middle-aged adult)<br><input type="checkbox"/> older than 65 years old (older adult) |
| Social relationships/isolation                                                                             | <input type="checkbox"/> 0 ~ 14 or 15 years old (pediatric)<br><input type="checkbox"/> 15 or 16 ~ 39 years old (adolescent/young adult)<br><input type="checkbox"/> 40 ~ 65 years old (middle-aged adult)<br><input type="checkbox"/> older than 65 years old (older adult) |
| Medical care related to cancer                                                                             | <input type="checkbox"/> 0 ~ 14 or 15 years old (pediatric)<br><input type="checkbox"/> 15 or 16 ~ 39 years old (adolescent/young adult)<br><input type="checkbox"/> 40 ~ 65 years old (middle-aged adult)<br><input type="checkbox"/> older than 65 years old (older adult) |
| Cancer-related symptom management                                                                          | <input type="checkbox"/> 0 ~ 14 or 15 years old (pediatric)<br><input type="checkbox"/> 15 or 16 ~ 39 years old (adolescent/young adult)<br><input type="checkbox"/> 40 ~ 65 years old (middle-aged adult)<br><input type="checkbox"/> older than 65 years old (older adult) |
| Physical functioning decline                                                                               | <input type="checkbox"/> 0 ~ 14 or 15 years old (pediatric)<br><input type="checkbox"/> 15 or 16 ~ 39 years old (adolescent/young adult)<br><input type="checkbox"/> 40 ~ 65 years old (middle-aged adult)<br><input type="checkbox"/> older than 65 years old (older adult) |
| Cognitive functioning decline                                                                              | <input type="checkbox"/> 0 ~ 14 or 15 years old (pediatric)<br><input type="checkbox"/> 15 or 16 ~ 39 years old (adolescent/young adult)<br><input type="checkbox"/> 40 ~ 65 years old (middle-aged adult)<br><input type="checkbox"/> older than 65 years old (older adult) |
| Insomnia, sleep difficulty, fatigue                                                                        | <input type="checkbox"/> 0 ~ 14 or 15 years old (pediatric)<br><input type="checkbox"/> 15 or 16 ~ 39 years old (adolescent/young adult)<br><input type="checkbox"/> 40 ~ 65 years old (middle-aged adult)<br><input type="checkbox"/> older than 65 years old (older adult) |
| Financial concern related to cancer care                                                                   | <input type="checkbox"/> 0 ~ 14 or 15 years old (pediatric)<br><input type="checkbox"/> 15 or 16 ~ 39 years old (adolescent/young adult)<br><input type="checkbox"/> 40 ~ 65 years old (middle-aged adult)<br><input type="checkbox"/> older than 65 years old (older adult) |

---

|                                                           |                                                                                                                                                                                                                                                                              |
|-----------------------------------------------------------|------------------------------------------------------------------------------------------------------------------------------------------------------------------------------------------------------------------------------------------------------------------------------|
| Personal care for daily living                            | <input type="checkbox"/> 0 ~ 14 or 15 years old (pediatric)<br><input type="checkbox"/> 15 or 16 ~ 39 years old (adolescent/young adult)<br><input type="checkbox"/> 40 ~ 65 years old (middle-aged adult)<br><input type="checkbox"/> older than 65 years old (older adult) |
| Balancing other social roles with a new role as a patient | <input type="checkbox"/> 0 ~ 14 or 15 years old (pediatric)<br><input type="checkbox"/> 15 or 16 ~ 39 years old (adolescent/young adult)<br><input type="checkbox"/> 40 ~ 65 years old (middle-aged adult)<br><input type="checkbox"/> older than 65 years old (older adult) |
| "[q5_1an1]"                                               | <input type="checkbox"/> 0 ~ 14 or 15 years old (pediatric)<br><input type="checkbox"/> 15 or 16 ~ 39 years old (adolescent/young adult)<br><input type="checkbox"/> 40 ~ 65 years old (middle-aged adult)<br><input type="checkbox"/> older than 65 years old (older adult) |
| "[q5_1ao1]"                                               | <input type="checkbox"/> 0 ~ 14 or 15 years old (pediatric)<br><input type="checkbox"/> 15 or 16 ~ 39 years old (adolescent/young adult)<br><input type="checkbox"/> 40 ~ 65 years old (middle-aged adult)<br><input type="checkbox"/> older than 65 years old (older adult) |
| "[q5_1ap1]"                                               | <input type="checkbox"/> 0 ~ 14 or 15 years old (pediatric)<br><input type="checkbox"/> 15 or 16 ~ 39 years old (adolescent/young adult)<br><input type="checkbox"/> 40 ~ 65 years old (middle-aged adult)<br><input type="checkbox"/> older than 65 years old (older adult) |
| "[q5_1aq1]"                                               | <input type="checkbox"/> 0 ~ 14 or 15 years old (pediatric)<br><input type="checkbox"/> 15 or 16 ~ 39 years old (adolescent/young adult)<br><input type="checkbox"/> 40 ~ 65 years old (middle-aged adult)<br><input type="checkbox"/> older than 65 years old (older adult) |
| "[q5_1ar1]"                                               | <input type="checkbox"/> 0 ~ 14 or 15 years old (pediatric)<br><input type="checkbox"/> 15 or 16 ~ 39 years old (adolescent/young adult)<br><input type="checkbox"/> 40 ~ 65 years old (middle-aged adult)<br><input type="checkbox"/> older than 65 years old (older adult) |

---

**Q8.1. Do you or your institution provide any services to address each of the concerns below for cancer patients/survivors?**

- |                                                                                                            |                                                                                                                                                                                                                                                                                |
|------------------------------------------------------------------------------------------------------------|--------------------------------------------------------------------------------------------------------------------------------------------------------------------------------------------------------------------------------------------------------------------------------|
| Emotional distress                                                                                         | <input type="radio"/> Yes, service for this concern is provided for all age groups<br><input type="radio"/> Yes, but service provision varies depending on the age group<br><input type="radio"/> No, service for concern is not provided<br><input type="radio"/> Do not know |
| Finding meaning, spiritual concerns                                                                        | <input type="radio"/> Yes, service for this concern is provided for all age groups<br><input type="radio"/> Yes, but service provision varies depending on the age group<br><input type="radio"/> No, service for concern is not provided<br><input type="radio"/> Do not know |
| Family relationships (communication problems, conflict management, concerns about children or adolescents) | <input type="radio"/> Yes, service for this concern is provided for all age groups<br><input type="radio"/> Yes, but service provision varies depending on the age group<br><input type="radio"/> No, service for concern is not provided<br><input type="radio"/> Do not know |
| Sexuality, intimacy                                                                                        | <input type="radio"/> Yes, service for this concern is provided for all age groups<br><input type="radio"/> Yes, but service provision varies depending on the age group<br><input type="radio"/> No, service for concern is not provided<br><input type="radio"/> Do not know |
| Social relationship/isolation                                                                              | <input type="radio"/> Yes, service for this concern is provided for all age groups<br><input type="radio"/> Yes, but service provision varies depending on the age group<br><input type="radio"/> No, service for concern is not provided<br><input type="radio"/> Do not know |
| Medical care related to cancer                                                                             | <input type="radio"/> Yes, service for this concern is provided for all age groups<br><input type="radio"/> Yes, but service provision varies depending on the age group<br><input type="radio"/> No, service for concern is not provided<br><input type="radio"/> Do not know |
| Cancer-related Symptom management                                                                          | <input type="radio"/> Yes, service for this concern is provided for all age groups<br><input type="radio"/> Yes, but service provision varies depending on the age group<br><input type="radio"/> No, service for concern is not provided<br><input type="radio"/> Do not know |
| Physical functioning decline                                                                               | <input type="radio"/> Yes, service for this concern is provided for all age groups<br><input type="radio"/> Yes, but service provision varies depending on the age group<br><input type="radio"/> No, service for concern is not provided<br><input type="radio"/> Do not know |

---

|                                                           |                                                                                                                                                                                                                                                                                |
|-----------------------------------------------------------|--------------------------------------------------------------------------------------------------------------------------------------------------------------------------------------------------------------------------------------------------------------------------------|
| Cognitive functioning decline                             | <input type="radio"/> Yes, service for this concern is provided for all age groups<br><input type="radio"/> Yes, but service provision varies depending on the age group<br><input type="radio"/> No, service for concern is not provided<br><input type="radio"/> Do not know |
| Insomnia, sleep difficulty, fatigue                       | <input type="radio"/> Yes, service for this concern is provided for all age groups<br><input type="radio"/> Yes, but service provision varies depending on the age group<br><input type="radio"/> No, service for concern is not provided<br><input type="radio"/> Do not know |
| Financial concern related to cancer care                  | <input type="radio"/> Yes, service for this concern is provided for all age groups<br><input type="radio"/> Yes, but service provision varies depending on the age group<br><input type="radio"/> No, service for concern is not provided<br><input type="radio"/> Do not know |
| Personal care for daily living                            | <input type="radio"/> Yes, service for this concern is provided for all age groups<br><input type="radio"/> Yes, but service provision varies depending on the age group<br><input type="radio"/> No, service for concern is not provided<br><input type="radio"/> Do not know |
| Balancing other social roles with a new role as a patient | <input type="radio"/> Yes, service for this concern is provided for all age groups<br><input type="radio"/> Yes, but service provision varies depending on the age group<br><input type="radio"/> No, service for concern is not provided<br><input type="radio"/> Do not know |
| "[q5_1an1]"                                               | <input type="radio"/> Yes, service for this concern is provided for all age groups<br><input type="radio"/> Yes, but service provision varies depending on the age group<br><input type="radio"/> No, service for concern is not provided<br><input type="radio"/> Do not know |
| "[q5_1ao1]"                                               | <input type="radio"/> Yes, service for this concern is provided for all age groups<br><input type="radio"/> Yes, but service provision varies depending on the age group<br><input type="radio"/> No, service for concern is not provided<br><input type="radio"/> Do not know |
| "[q5_1ap1]"                                               | <input type="radio"/> Yes, service for this concern is provided for all age groups<br><input type="radio"/> Yes, but service provision varies depending on the age group<br><input type="radio"/> No, service for concern is not provided<br><input type="radio"/> Do not know |

---

---

"[q5\_1aq1]"

- Yes, service for this concern is provided for all age groups
- Yes, but service provision varies depending on the age group
- No, service for concern is not provided
- Do not know

---

"[q5\_1ar1]"

- Yes, service for this concern is provided for all age groups
- Yes, but service provision varies depending on the age group
- No, service for concern is not provided
- Do not know

**Q8.2. Now please check (✓) the box for the age group(s) for which you or your institution provides any services to address each of the concerns below.**

|                                                                                                            |                                                                                                                                                                                                                                                                              |
|------------------------------------------------------------------------------------------------------------|------------------------------------------------------------------------------------------------------------------------------------------------------------------------------------------------------------------------------------------------------------------------------|
| Emotional distress                                                                                         | <input type="checkbox"/> 0 ~ 14 or 15 years old (pediatric)<br><input type="checkbox"/> 15 or 16 ~ 39 years old (adolescent/young adult)<br><input type="checkbox"/> 40 ~ 65 years old (middle-aged adult)<br><input type="checkbox"/> older than 65 years old (older adult) |
| Finding meaning, spiritual concerns                                                                        | <input type="checkbox"/> 0 ~ 14 or 15 years old (pediatric)<br><input type="checkbox"/> 15 or 16 ~ 39 years old (adolescent/young adult)<br><input type="checkbox"/> 40 ~ 65 years old (middle-aged adult)<br><input type="checkbox"/> older than 65 years old (older adult) |
| Family relationships (communication problems, conflict management, concerns about children or adolescents) | <input type="checkbox"/> 0 ~ 14 or 15 years old (pediatric)<br><input type="checkbox"/> 15 or 16 ~ 39 years old (adolescent/young adult)<br><input type="checkbox"/> 40 ~ 65 years old (middle-aged adult)<br><input type="checkbox"/> older than 65 years old (older adult) |
| Sexuality, intimacy                                                                                        | <input type="checkbox"/> 0 ~ 14 or 15 years old (pediatric)<br><input type="checkbox"/> 15 or 16 ~ 39 years old (adolescent/young adult)<br><input type="checkbox"/> 40 ~ 65 years old (middle-aged adult)<br><input type="checkbox"/> older than 65 years old (older adult) |
| Social relationships/isolation                                                                             | <input type="checkbox"/> 0 ~ 14 or 15 years old (pediatric)<br><input type="checkbox"/> 15 or 16 ~ 39 years old (adolescent/young adult)<br><input type="checkbox"/> 40 ~ 65 years old (middle-aged adult)<br><input type="checkbox"/> older than 65 years old (older adult) |
| Medical care related to cancer                                                                             | <input type="checkbox"/> 0 ~ 14 or 15 years old (pediatric)<br><input type="checkbox"/> 15 or 16 ~ 39 years old (adolescent/young adult)<br><input type="checkbox"/> 40 ~ 65 years old (middle-aged adult)<br><input type="checkbox"/> older than 65 years old (older adult) |
| Cancer-related symptom management                                                                          | <input type="checkbox"/> 0 ~ 14 or 15 years old (pediatric)<br><input type="checkbox"/> 15 or 16 ~ 39 years old (adolescent/young adult)<br><input type="checkbox"/> 40 ~ 65 years old (middle-aged adult)<br><input type="checkbox"/> older than 65 years old (older adult) |
| Physical functioning decline                                                                               | <input type="checkbox"/> 0 ~ 14 or 15 years old (pediatric)<br><input type="checkbox"/> 15 or 16 ~ 39 years old (adolescent/young adult)<br><input type="checkbox"/> 40 ~ 65 years old (middle-aged adult)<br><input type="checkbox"/> older than 65 years old (older adult) |
| Cognitive functioning decline                                                                              | <input type="checkbox"/> 0 ~ 14 or 15 years old (pediatric)<br><input type="checkbox"/> 15 or 16 ~ 39 years old (adolescent/young adult)<br><input type="checkbox"/> 40 ~ 65 years old (middle-aged adult)<br><input type="checkbox"/> older than 65 years old (older adult) |
| Insomnia, sleep difficulty, fatigue                                                                        | <input type="checkbox"/> 0 ~ 14 or 15 years old (pediatric)<br><input type="checkbox"/> 15 or 16 ~ 39 years old (adolescent/young adult)<br><input type="checkbox"/> 40 ~ 65 years old (middle-aged adult)<br><input type="checkbox"/> older than 65 years old (older adult) |
| Financial concern related to cancer care                                                                   | <input type="checkbox"/> 0 ~ 14 or 15 years old (pediatric)<br><input type="checkbox"/> 15 or 16 ~ 39 years old (adolescent/young adult)<br><input type="checkbox"/> 40 ~ 65 years old (middle-aged adult)<br><input type="checkbox"/> older than 65 years old (older adult) |

---

|                                                           |                                                                                                                                                                                                                                                                              |
|-----------------------------------------------------------|------------------------------------------------------------------------------------------------------------------------------------------------------------------------------------------------------------------------------------------------------------------------------|
| Personal care for daily living                            | <input type="checkbox"/> 0 ~ 14 or 15 years old (pediatric)<br><input type="checkbox"/> 15 or 16 ~ 39 years old (adolescent/young adult)<br><input type="checkbox"/> 40 ~ 65 years old (middle-aged adult)<br><input type="checkbox"/> older than 65 years old (older adult) |
| Balancing other social roles with a new role as a patient | <input type="checkbox"/> 0 ~ 14 or 15 years old (pediatric)<br><input type="checkbox"/> 15 or 16 ~ 39 years old (adolescent/young adult)<br><input type="checkbox"/> 40 ~ 65 years old (middle-aged adult)<br><input type="checkbox"/> older than 65 years old (older adult) |
| "[q5_1an1]"                                               | <input type="checkbox"/> 0 ~ 14 or 15 years old (pediatric)<br><input type="checkbox"/> 15 or 16 ~ 39 years old (adolescent/young adult)<br><input type="checkbox"/> 40 ~ 65 years old (middle-aged adult)<br><input type="checkbox"/> older than 65 years old (older adult) |
| "[q5_1ao1]"                                               | <input type="checkbox"/> 0 ~ 14 or 15 years old (pediatric)<br><input type="checkbox"/> 15 or 16 ~ 39 years old (adolescent/young adult)<br><input type="checkbox"/> 40 ~ 65 years old (middle-aged adult)<br><input type="checkbox"/> older than 65 years old (older adult) |
| "[q5_1ap1]"                                               | <input type="checkbox"/> 0 ~ 14 or 15 years old (pediatric)<br><input type="checkbox"/> 15 or 16 ~ 39 years old (adolescent/young adult)<br><input type="checkbox"/> 40 ~ 65 years old (middle-aged adult)<br><input type="checkbox"/> older than 65 years old (older adult) |
| "[q5_1aq1]"                                               | <input type="checkbox"/> 0 ~ 14 or 15 years old (pediatric)<br><input type="checkbox"/> 15 or 16 ~ 39 years old (adolescent/young adult)<br><input type="checkbox"/> 40 ~ 65 years old (middle-aged adult)<br><input type="checkbox"/> older than 65 years old (older adult) |
| "[q5_1ar1]"                                               | <input type="checkbox"/> 0 ~ 14 or 15 years old (pediatric)<br><input type="checkbox"/> 15 or 16 ~ 39 years old (adolescent/young adult)<br><input type="checkbox"/> 40 ~ 65 years old (middle-aged adult)<br><input type="checkbox"/> older than 65 years old (older adult) |

---



**Q9.1. What kinds of services do you or your institution provide to help cancer patients or survivors manage the following concerns?**

**Please first check (✓) all boxes that apply if you or your institution does provide the service listed below to address the concern for cancer patients/survivors.**

**Then, answer whether that same service to address the concern is provided for all age groups, or if the service provision varies depending on the age group.**

Emotional distress

Psychotherapy or Psychological Counseling  
 Support Group or Forums  
 Booklets or Audio/Video Self-Help Materials  
 Pharmacologic  
 Other

Is Psychotherapy or Psychological Counseling for provided for all age groups?  Yes, it is provided for all age groups  
 No, it varies depending on the age group

Is Support Group or Forums provided for all age groups?  Yes, it is provided for all age groups  
 No, it varies depending on the age group

Is Booklets or Audio/Video Self-Help Materials provided for all age groups?  Yes, it is provided for all age groups  
 No, it varies depending on the age group

Is Pharmacologic service provided for all age groups?  Yes, it is provided for all age groups  
 No, it varies depending on the age group

Is Other provided for all age groups?  Yes, it is provided for all age groups  
 No, it varies depending on the age group

Please specify what "Other" is

\_\_\_\_\_

Finding meaning, spiritual concerns

Psychotherapy or Psychological Counseling  
 Support Group or Forums  
 Booklets or Audio/Video Self-Help Materials  
 Pharmacologic  
 Other

Is Psychotherapy or Psychological Counseling for provided for all age groups?  Yes, it is provided for all age groups  
 No, it varies depending on the age group

Is Support Group or Forums provided for all age groups?  Yes, it is provided for all age groups  
 No, it varies depending on the age group

Is Booklets or Audio/Video Self-Help Materials provided for all age groups?  Yes, it is provided for all age groups  
 No, it varies depending on the age group

Is Pharmacologic service provided for all age groups?  Yes, it is provided for all age groups  
 No, it varies depending on the age group

Is Other provided for all age groups?  Yes, it is provided for all age groups  
 No, it varies depending on the age group

Please specify what "Other" is

---

Family relationships (communication problems, conflict management, concerns about children or adolescents)

- Psychotherapy or Psychological Counseling  
 Support Group or Forums  
 Booklets or Audio/Video Self-Help Materials  
 Pharmacologic  
 Other

Is Psychotherapy or Psychological Counseling for provided for all age groups?

- Yes, it is provided for all age groups  
 No, it varies depending on the age group

Is Support Group or Forums provided for all age groups?

- Yes, it is provided for all age groups  
 No, it varies depending on the age group

Is Booklets or Audio/Video Self-Help Materials provided for all age groups?

- Yes, it is provided for all age groups  
 No, it varies depending on the age group

Is Pharmacologic service provided for all age groups?

- Yes, it is provided for all age groups  
 No, it varies depending on the age group

Is Other provided for all age groups?

- Yes, it is provided for all age groups  
 No, it varies depending on the age group

Please specify what "Other" is

---

Sexuality, intimacy

- Psychotherapy or Psychological Counseling  
 Support Group or Forums  
 Booklets or Audio/Video Self-Help Materials  
 Pharmacologic  
 Other

Is Psychotherapy or Psychological Counseling for provided for all age groups?

- Yes, it is provided for all age groups  
 No, it varies depending on the age group

Is Support Group or Forums provided for all age groups?

- Yes, it is provided for all age groups  
 No, it varies depending on the age group

Is Booklets or Audio/Video Self-Help Materials provided for all age groups?

- Yes, it is provided for all age groups  
 No, it varies depending on the age group

Is Pharmacologic service provided for all age groups?

- Yes, it is provided for all age groups  
 No, it varies depending on the age group

Is Other provided for all age groups?

- Yes, it is provided for all age groups  
 No, it varies depending on the age group

Please specify what "Other" is

---

Social relationships/isolation

- Psychotherapy or Psychological Counseling  
 Support Group or Forums  
 Booklets or Audio/Video Self-Help Materials  
 Pharmacologic  
 Other

Is Psychotherapy or Psychological Counseling for provided for all age groups?

- Yes, it is provided for all age groups  
 No, it varies depending on the age group

Is Support Group or Forums provided for all age groups?

- Yes, it is provided for all age groups  
 No, it varies depending on the age group

Is Booklets or Audio/Video Self-Help Materials provided for all age groups?

- Yes, it is provided for all age groups  
 No, it varies depending on the age group

Is Pharmacologic service provided for all age groups?

- Yes, it is provided for all age groups  
 No, it varies depending on the age group

Is Other provided for all age groups?

- Yes, it is provided for all age groups  
 No, it varies depending on the age group

Please specify what "Other" is

\_\_\_\_\_

Medical care related to cancer

- Psychotherapy or Psychological Counseling  
 Support Group or Forums  
 Booklets or Audio/Video Self-Help Materials  
 Pharmacologic  
 Other

Is Psychotherapy or Psychological Counseling for provided for all age groups?

- Yes, it is provided for all age groups  
 No, it varies depending on the age group

Is Support Group or Forums provided for all age groups?

- Yes, it is provided for all age groups  
 No, it varies depending on the age group

Is Booklets or Audio/Video Self-Help Materials provided for all age groups?

- Yes, it is provided for all age groups  
 No, it varies depending on the age group

Is Pharmacologic service provided for all age groups?

- Yes, it is provided for all age groups  
 No, it varies depending on the age group

Is Other provided for all age groups?

- Yes, it is provided for all age groups  
 No, it varies depending on the age group

Please specify what "Other" is

\_\_\_\_\_

Cancer-related symptom management

- Psychotherapy or Psychological Counseling  
 Support Group or Forums  
 Booklets or Audio/Video Self-Help Materials  
 Pharmacologic  
 Other

Is Psychotherapy or Psychological Counseling for provided for all age groups?

- Yes, it is provided for all age groups  
 No, it varies depending on the age group

Is Support Group or Forums provided for all age groups?

- Yes, it is provided for all age groups  
 No, it varies depending on the age group

Is Booklets or Audio/Video Self-Help Materials provided for all age groups?

- Yes, it is provided for all age groups  
 No, it varies depending on the age group

---

Is Pharmacologic service provided for all age groups?

- Yes, it is provided for all age groups  
 No, it varies depending on the age group

---

Is Other provided for all age groups?

- Yes, it is provided for all age groups  
 No, it varies depending on the age group

---

Please specify what "Other" is

---

---

Physical functioning decline

- Psychotherapy or Psychological Counseling  
 Support Group or Forums  
 Booklets or Audio/Video Self-Help Materials  
 Pharmacologic  
 Other

---

Is Psychotherapy or Psychological Counseling for provided for all age groups?

- Yes, it is provided for all age groups  
 No, it varies depending on the age group

---

Is Support Group or Forums provided for all age groups?

- Yes, it is provided for all age groups  
 No, it varies depending on the age group

---

Is Booklets or Audio/Video Self-Help Materials provided for all age groups?

- Yes, it is provided for all age groups  
 No, it varies depending on the age group

---

Is Pharmacologic service provided for all age groups?

- Yes, it is provided for all age groups  
 No, it varies depending on the age group

---

Is Other provided for all age groups?

- Yes, it is provided for all age groups  
 No, it varies depending on the age group

---

Please specify what "Other" is

---

---

Cognitive functioning decline

- Psychotherapy or Psychological Counseling  
 Support Group or Forums  
 Booklets or Audio/Video Self-Help Materials  
 Pharmacologic  
 Other

---

Is Psychotherapy or Psychological Counseling for provided for all age groups?

- Yes, it is provided for all age groups  
 No, it varies depending on the age group

---

Is Support Group or Forums provided for all age groups?

- Yes, it is provided for all age groups  
 No, it varies depending on the age group

---

Is Booklets or Audio/Video Self-Help Materials provided for all age groups?

- Yes, it is provided for all age groups  
 No, it varies depending on the age group

---

Is Pharmacologic service provided for all age groups?

- Yes, it is provided for all age groups  
 No, it varies depending on the age group

---

Is Other provided for all age groups?

- Yes, it is provided for all age groups  
 No, it varies depending on the age group

---

Please specify what "Other" is

---

Insomnia, sleep difficulty, fatigue

Psychotherapy or Psychological Counseling  
 Support Group or Forums  
 Booklets or Audio/Video Self-Help Materials  
 Pharmacologic  
 Other

Is Psychotherapy or Psychological Counseling for provided for all age groups?

Yes, it is provided for all age groups  
 No, it varies depending on the age group

Is Support Group or Forums provided for all age groups?

Yes, it is provided for all age groups  
 No, it varies depending on the age group

Is Booklets or Audio/Video Self-Help Materials provided for all age groups?

Yes, it is provided for all age groups  
 No, it varies depending on the age group

Is Pharmacologic service provided for all age groups?

Yes, it is provided for all age groups  
 No, it varies depending on the age group

Is Other provided for all age groups?

Yes, it is provided for all age groups  
 No, it varies depending on the age group

Please specify what "Other" is

\_\_\_\_\_

Financial concern related to cancer care

Psychotherapy or Psychological Counseling  
 Support Group or Forums  
 Booklets or Audio/Video Self-Help Materials  
 Pharmacologic  
 Other

Is Psychotherapy or Psychological Counseling for provided for all age groups?

Yes, it is provided for all age groups  
 No, it varies depending on the age group

Is Support Group or Forums provided for all age groups?

Yes, it is provided for all age groups  
 No, it varies depending on the age group

Is Booklets or Audio/Video Self-Help Materials provided for all age groups?

Yes, it is provided for all age groups  
 No, it varies depending on the age group

Is Pharmacologic service provided for all age groups?

Yes, it is provided for all age groups  
 No, it varies depending on the age group

Is Other provided for all age groups?

Yes, it is provided for all age groups  
 No, it varies depending on the age group

Please specify what "Other" is

\_\_\_\_\_

Personal care for daily living

Psychotherapy or Psychological Counseling  
 Support Group or Forums  
 Booklets or Audio/Video Self-Help Materials  
 Pharmacologic  
 Other

Is Psychotherapy or Psychological Counseling for provided for all age groups?

Yes, it is provided for all age groups  
 No, it varies depending on the age group

Is Support Group or Forums provided for all age groups?  Yes, it is provided for all age groups  
 No, it varies depending on the age group

Is Booklets or Audio/Video Self-Help Materials provided for all age groups?  Yes, it is provided for all age groups  
 No, it varies depending on the age group

Is Pharmacologic service provided for all age groups?  Yes, it is provided for all age groups  
 No, it varies depending on the age group

Is Other provided for all age groups?  Yes, it is provided for all age groups  
 No, it varies depending on the age group

Please specify what "Other" is \_\_\_\_\_

Balancing other social roles with a new role as a patient  Psychotherapy or Psychological Counseling  
 Support Group or Forums  
 Booklets or Audio/Video Self-Help Materials  
 Pharmacologic  
 Other

Is Psychotherapy or Psychological Counseling for provided for all age groups?  Yes, it is provided for all age groups  
 No, it varies depending on the age group

Is Support Group or Forums provided for all age groups?  Yes, it is provided for all age groups  
 No, it varies depending on the age group

Is Booklets or Audio/Video Self-Help Materials provided for all age groups?  Yes, it is provided for all age groups  
 No, it varies depending on the age group

Is Pharmacologic service provided for all age groups?  Yes, it is provided for all age groups  
 No, it varies depending on the age group

Is Other provided for all age groups?  Yes, it is provided for all age groups  
 No, it varies depending on the age group

Please specify what "Other" is \_\_\_\_\_

"[q5\_1an1]"  Psychotherapy or Psychological Counseling  
 Support Group or Forums  
 Booklets or Audio/Video Self-Help Materials  
 Pharmacologic  
 Other

Is Psychotherapy or Psychological Counseling for provided for all age groups?  Yes, it is provided for all age groups  
 No, it varies depending on the age group

Is Support Group or Forums provided for all age groups?  Yes, it is provided for all age groups  
 No, it varies depending on the age group

Is Booklets or Audio/Video Self-Help Materials provided for all age groups?  Yes, it is provided for all age groups  
 No, it varies depending on the age group

Is Pharmacologic service provided for all age groups?  Yes, it is provided for all age groups  
 No, it varies depending on the age group

---

Is Other provided for all age groups?

- Yes, it is provided for all age groups  
 No, it varies depending on the age group
- 

Please specify what "Other" is

---

"[q5\_1ao1]"

- Psychotherapy or Psychological Counseling  
 Support Group or Forums  
 Booklets or Audio/Video Self-Help Materials  
 Pharmacologic  
 Other
- 

Is Psychotherapy or Psychological Counseling for provided for all age groups?

- Yes, it is provided for all age groups  
 No, it varies depending on the age group
- 

Is Support Group or Forums provided for all age groups?

- Yes, it is provided for all age groups  
 No, it varies depending on the age group
- 

Is Booklets or Audio/Video Self-Help Materials provided for all age groups?

- Yes, it is provided for all age groups  
 No, it varies depending on the age group
- 

Is Pharmacologic service provided for all age groups?

- Yes, it is provided for all age groups  
 No, it varies depending on the age group
- 

Is Other provided for all age groups?

- Yes, it is provided for all age groups  
 No, it varies depending on the age group
- 

Please specify what "Other" is

---

"[q5\_1ap1]"

- Psychotherapy or Psychological Counseling  
 Support Group or Forums  
 Booklets or Audio/Video Self-Help Materials  
 Pharmacologic  
 Other
- 

Is Psychotherapy or Psychological Counseling for provided for all age groups?

- Yes, it is provided for all age groups  
 No, it varies depending on the age group
- 

Is Support Group or Forums provided for all age groups?

- Yes, it is provided for all age groups  
 No, it varies depending on the age group
- 

Is Booklets or Audio/Video Self-Help Materials provided for all age groups?

- Yes, it is provided for all age groups  
 No, it varies depending on the age group
- 

Is Pharmacologic service provided for all age groups?

- Yes, it is provided for all age groups  
 No, it varies depending on the age group
- 

Is Other provided for all age groups?

- Yes, it is provided for all age groups  
 No, it varies depending on the age group
- 

Please specify what "Other" is

---

"[q5\_1aq1]"

- Psychotherapy or Psychological Counseling  
 Support Group or Forums  
 Booklets or Audio/Video Self-Help Materials  
 Pharmacologic  
 Other

Is Psychotherapy or Psychological Counseling for provided for all age groups?

- Yes, it is provided for all age groups  
 No, it varies depending on the age group

Is Support Group or Forums provided for all age groups?

- Yes, it is provided for all age groups  
 No, it varies depending on the age group

Is Booklets or Audio/Video Self-Help Materials provided for all age groups?

- Yes, it is provided for all age groups  
 No, it varies depending on the age group

Is Pharmacologic service provided for all age groups?

- Yes, it is provided for all age groups  
 No, it varies depending on the age group

Is Other provided for all age groups?

- Yes, it is provided for all age groups  
 No, it varies depending on the age group

Please specify what "Other" is

\_\_\_\_\_

"[q5\_1ar1]"

- Psychotherapy or Psychological Counseling  
 Support Group or Forums  
 Booklets or Audio/Video Self-Help Materials  
 Pharmacologic  
 Other

Is Psychotherapy or Psychological Counseling for provided for all age groups?

- Yes, it is provided for all age groups  
 No, it varies depending on the age group

Is Support Group or Forums provided for all age groups?

- Yes, it is provided for all age groups  
 No, it varies depending on the age group

Is Booklets or Audio/Video Self-Help Materials provided for all age groups?

- Yes, it is provided for all age groups  
 No, it varies depending on the age group

Is Pharmacologic service provided for all age groups?

- Yes, it is provided for all age groups  
 No, it varies depending on the age group

Is Other provided for all age groups?

- Yes, it is provided for all age groups  
 No, it varies depending on the age group

Please specify what "Other" is

\_\_\_\_\_



**Q9.2. Now please check (✓) the box for the age group(s) for which the kinds of services that you or your institution provides to address the specific concern listed below.**

Psychotherapy or Psychological Counseling for managing Emotional Distress

- 0 ~ 14 or 15 years old (pediatric)  
 15 or 16 ~ 39 years old (adolescent/young adult)  
 40 ~ 65 years old (middle-aged adult)  
 older than 65 years old (older adult)

Support Group or Forums for managing Emotional Distress

- 0 ~ 14 or 15 years old (pediatric)  
 15 or 16 ~ 39 years old (adolescent/young adult)  
 40 ~ 65 years old (middle-aged adult)  
 older than 65 years old (older adult)

Booklets or Audio/Video Self-Help Materials for managing Emotional Distress

- 0 ~ 14 or 15 years old (pediatric)  
 15 or 16 ~ 39 years old (adolescent/young adult)  
 40 ~ 65 years old (middle-aged adult)  
 older than 65 years old (older adult)

Pharmacologic service for managing Emotional Distress

- 0 ~ 14 or 15 years old (pediatric)  
 15 or 16 ~ 39 years old (adolescent/young adult)  
 40 ~ 65 years old (middle-aged adult)  
 older than 65 years old (older adult)

"[q9\_1a5o]" for managing Emotional Distress

- 0 ~ 14 or 15 years old (pediatric)  
 15 or 16 ~ 39 years old (adolescent/young adult)  
 40 ~ 65 years old (middle-aged adult)  
 older than 65 years old (older adult)

Psychotherapy or Psychological counseling for managing Finding Meaning, Spiritual Concerns

- 0 ~ 14 or 15 years old (pediatric)  
 15 or 16 ~ 39 years old (adolescent/young adult)  
 40 ~ 65 years old (middle-aged adult)  
 older than 65 years old (older adult)

Support Group or Forums for managing Finding Meaning, Spiritual Concerns

- 0 ~ 14 or 15 years old (pediatric)  
 15 or 16 ~ 39 years old (adolescent/young adult)  
 40 ~ 65 years old (middle-aged adult)  
 older than 65 years old (older adult)

Booklets or Audio/Video Self-Help Materials for managing Finding Meaning, Spiritual Concerns

- 0 ~ 14 or 15 years old (pediatric)  
 15 or 16 ~ 39 years old (adolescent/young adult)  
 40 ~ 65 years old (middle-aged adult)  
 older than 65 years old (older adult)

Pharmacologic service for managing Finding Meaning, Spiritual Concerns

- 0 ~ 14 or 15 years old (pediatric)  
 15 or 16 ~ 39 years old (adolescent/young adult)  
 40 ~ 65 years old (middle-aged adult)  
 older than 65 years old (older adult)

"[q9\_1b5o]" for managing Finding Meaning, Spiritual Concerns

- 0 ~ 14 or 15 years old (pediatric)  
 15 or 16 ~ 39 years old (adolescent/young adult)  
 40 ~ 65 years old (middle-aged adult)  
 older than 65 years old (older adult)

Psychotherapy or Psychological Counseling for managing Family Relationships (communication problems, conflict management, concerns about children or adolescents)

- 0 ~ 14 or 15 years old (pediatric)  
 15 or 16 ~ 39 years old (adolescent/young adult)  
 40 ~ 65 years old (middle-aged adult)  
 older than 65 years old (older adult)

Support Group or Forums for managing Family Relationships (communication problems, conflict management, concerns about children or adolescents)

- 0 ~ 14 or 15 years old (pediatric)  
 15 or 16 ~ 39 years old (adolescent/young adult)  
 40 ~ 65 years old (middle-aged adult)  
 older than 65 years old (older adult)

Booklets or Audio/Video Self-Help Materials for managing Family Relationships (communication problems, conflict management, concerns about children or adolescents)

- 0 ~ 14 or 15 years old (pediatric)  
 15 or 16 ~ 39 years old (adolescent/young adult)  
 40 ~ 65 years old (middle-aged adult)  
 older than 65 years old (older adult)

Pharmacologic service for managing Family Relationships (communication problems, conflict management, concerns about children or adolescents)

- 0 ~ 14 or 15 years old (pediatric)  
 15 or 16 ~ 39 years old (adolescent/young adult)  
 40 ~ 65 years old (middle-aged adult)  
 older than 65 years old (older adult)

"[q9\_1c5o]" for managing Family Relationships (communication problems, conflict management, concerns about children or adolescents)

- 0 ~ 14 or 15 years old (pediatric)  
 15 or 16 ~ 39 years old (adolescent/young adult)  
 40 ~ 65 years old (middle-aged adult)  
 older than 65 years old (older adult)

Psychotherapy or Psychological Counseling for managing Sexuality, Intimacy

- 0 ~ 14 or 15 years old (pediatric)  
 15 or 16 ~ 39 years old (adolescent/young adult)  
 40 ~ 65 years old (middle-aged adult)  
 older than 65 years old (older adult)

Support Group or Forums for managing Sexuality, Intimacy

- 0 ~ 14 or 15 years old (pediatric)  
 15 or 16 ~ 39 years old (adolescent/young adult)  
 40 ~ 65 years old (middle-aged adult)  
 older than 65 years old (older adult)

Booklets or Audio/Video Self-Help Materials for managing Sexuality, Intimacy

- 0 ~ 14 or 15 years old (pediatric)  
 15 or 16 ~ 39 years old (adolescent/young adult)  
 40 ~ 65 years old (middle-aged adult)  
 older than 65 years old (older adult)

Pharmacologic service for managing Sexuality, Intimacy

- 0 ~ 14 or 15 years old (pediatric)  
 15 or 16 ~ 39 years old (adolescent/young adult)  
 40 ~ 65 years old (middle-aged adult)  
 older than 65 years old (older adult)

"[q9\_1d5o]" for managing Sexuality, Intimacy

- 0 ~ 14 or 15 years old (pediatric)  
 15 or 16 ~ 39 years old (adolescent/young adult)  
 40 ~ 65 years old (middle-aged adult)  
 older than 65 years old (older adult)

Psychotherapy or Psychological Counseling for managing Social Relationships/Isolation

- 0 ~ 14 or 15 years old (pediatric)  
 15 or 16 ~ 39 years old (adolescent/young adult)  
 40 ~ 65 years old (middle-aged adult)  
 older than 65 years old (older adult)

Support Group or Forums for managing Social Relationships/Isolation

- 0 ~ 14 or 15 years old (pediatric)  
 15 or 16 ~ 39 years old (adolescent/young adult)  
 40 ~ 65 years old (middle-aged adult)  
 older than 65 years old (older adult)

|                                                                                         |                                                                                                                                                                                                                                                                              |
|-----------------------------------------------------------------------------------------|------------------------------------------------------------------------------------------------------------------------------------------------------------------------------------------------------------------------------------------------------------------------------|
| Booklets or Audio/Video Self-Help Materials for managing Social Relationships/Isolation | <input type="checkbox"/> 0 ~ 14 or 15 years old (pediatric)<br><input type="checkbox"/> 15 or 16 ~ 39 years old (adolescent/young adult)<br><input type="checkbox"/> 40 ~ 65 years old (middle-aged adult)<br><input type="checkbox"/> older than 65 years old (older adult) |
| Pharmacologic service for managing Social Relationships/Isolation                       | <input type="checkbox"/> 0 ~ 14 or 15 years old (pediatric)<br><input type="checkbox"/> 15 or 16 ~ 39 years old (adolescent/young adult)<br><input type="checkbox"/> 40 ~ 65 years old (middle-aged adult)<br><input type="checkbox"/> older than 65 years old (older adult) |
| "[q9_1e5o]" for managing Social Relationships/Isolation                                 | <input type="checkbox"/> 0 ~ 14 or 15 years old (pediatric)<br><input type="checkbox"/> 15 or 16 ~ 39 years old (adolescent/young adult)<br><input type="checkbox"/> 40 ~ 65 years old (middle-aged adult)<br><input type="checkbox"/> older than 65 years old (older adult) |
| Psychotherapy or Psychological Counseling for managing Medical Care Related to Cancer   | <input type="checkbox"/> 0 ~ 14 or 15 years old (pediatric)<br><input type="checkbox"/> 15 or 16 ~ 39 years old (adolescent/young adult)<br><input type="checkbox"/> 40 ~ 65 years old (middle-aged adult)<br><input type="checkbox"/> older than 65 years old (older adult) |
| Support Group or Forums for managing Medical Care Related to Cancer                     | <input type="checkbox"/> 0 ~ 14 or 15 years old (pediatric)<br><input type="checkbox"/> 15 or 16 ~ 39 years old (adolescent/young adult)<br><input type="checkbox"/> 40 ~ 65 years old (middle-aged adult)<br><input type="checkbox"/> older than 65 years old (older adult) |
| Booklets or Audio/Video Self-Help Materials for managing Medical Care Related to Cancer | <input type="checkbox"/> 0 ~ 14 or 15 years old (pediatric)<br><input type="checkbox"/> 15 or 16 ~ 39 years old (adolescent/young adult)<br><input type="checkbox"/> 40 ~ 65 years old (middle-aged adult)<br><input type="checkbox"/> older than 65 years old (older adult) |
| Pharmacologic service for managing Medical Care Related to Cancer                       | <input type="checkbox"/> 0 ~ 14 or 15 years old (pediatric)<br><input type="checkbox"/> 15 or 16 ~ 39 years old (adolescent/young adult)<br><input type="checkbox"/> 40 ~ 65 years old (middle-aged adult)<br><input type="checkbox"/> older than 65 years old (older adult) |
| "[q9_1f5o]" for managing Medical Care Related to Cancer                                 | <input type="checkbox"/> 0 ~ 14 or 15 years old (pediatric)<br><input type="checkbox"/> 15 or 16 ~ 39 years old (adolescent/young adult)<br><input type="checkbox"/> 40 ~ 65 years old (middle-aged adult)<br><input type="checkbox"/> older than 65 years old (older adult) |
| Psychotherapy or Psychological Counseling for managing Cancer-Related Symptoms          | <input type="checkbox"/> 0 ~ 14 or 15 years old (pediatric)<br><input type="checkbox"/> 15 or 16 ~ 39 years old (adolescent/young adult)<br><input type="checkbox"/> 40 ~ 65 years old (middle-aged adult)<br><input type="checkbox"/> older than 65 years old (older adult) |
| Support Group or Forums for managing Cancer-Related Symptoms                            | <input type="checkbox"/> 0 ~ 14 or 15 years old (pediatric)<br><input type="checkbox"/> 15 or 16 ~ 39 years old (adolescent/young adult)<br><input type="checkbox"/> 40 ~ 65 years old (middle-aged adult)<br><input type="checkbox"/> older than 65 years old (older adult) |
| Booklets or Audio/Video Self-Help Materials for managing Cancer-Related Symptoms        | <input type="checkbox"/> 0 ~ 14 or 15 years old (pediatric)<br><input type="checkbox"/> 15 or 16 ~ 39 years old (adolescent/young adult)<br><input type="checkbox"/> 40 ~ 65 years old (middle-aged adult)<br><input type="checkbox"/> older than 65 years old (older adult) |

|                                                                                        |                                                                                                                                                                                                                                                                              |
|----------------------------------------------------------------------------------------|------------------------------------------------------------------------------------------------------------------------------------------------------------------------------------------------------------------------------------------------------------------------------|
| Pharmacologic service for managing Cancer-Related Symptoms                             | <input type="checkbox"/> 0 ~ 14 or 15 years old (pediatric)<br><input type="checkbox"/> 15 or 16 ~ 39 years old (adolescent/young adult)<br><input type="checkbox"/> 40 ~ 65 years old (middle-aged adult)<br><input type="checkbox"/> older than 65 years old (older adult) |
| "[q9_1g5o]" for managing Cancer-Related Symptoms                                       | <input type="checkbox"/> 0 ~ 14 or 15 years old (pediatric)<br><input type="checkbox"/> 15 or 16 ~ 39 years old (adolescent/young adult)<br><input type="checkbox"/> 40 ~ 65 years old (middle-aged adult)<br><input type="checkbox"/> older than 65 years old (older adult) |
| Psychotherapy or Psychological Counseling for managing Physical Functioning Decline    | <input type="checkbox"/> 0 ~ 14 or 15 years old (pediatric)<br><input type="checkbox"/> 15 or 16 ~ 39 years old (adolescent/young adult)<br><input type="checkbox"/> 40 ~ 65 years old (middle-aged adult)<br><input type="checkbox"/> older than 65 years old (older adult) |
| Support Group or Forums for managing Physical Functioning Decline                      | <input type="checkbox"/> 0 ~ 14 or 15 years old (pediatric)<br><input type="checkbox"/> 15 or 16 ~ 39 years old (adolescent/young adult)<br><input type="checkbox"/> 40 ~ 65 years old (middle-aged adult)<br><input type="checkbox"/> older than 65 years old (older adult) |
| Booklets or Audio/Video Self-Help Materials for managing Physical Functioning Decline  | <input type="checkbox"/> 0 ~ 14 or 15 years old (pediatric)<br><input type="checkbox"/> 15 or 16 ~ 39 years old (adolescent/young adult)<br><input type="checkbox"/> 40 ~ 65 years old (middle-aged adult)<br><input type="checkbox"/> older than 65 years old (older adult) |
| Pharmacologic service for managing Physical Functioning Decline                        | <input type="checkbox"/> 0 ~ 14 or 15 years old (pediatric)<br><input type="checkbox"/> 15 or 16 ~ 39 years old (adolescent/young adult)<br><input type="checkbox"/> 40 ~ 65 years old (middle-aged adult)<br><input type="checkbox"/> older than 65 years old (older adult) |
| "[q9_1h5o]" for managing Physical Functioning Decline                                  | <input type="checkbox"/> 0 ~ 14 or 15 years old (pediatric)<br><input type="checkbox"/> 15 or 16 ~ 39 years old (adolescent/young adult)<br><input type="checkbox"/> 40 ~ 65 years old (middle-aged adult)<br><input type="checkbox"/> older than 65 years old (older adult) |
| Psychotherapy or Psychological Counseling for managing Cognitive Functioning Decline   | <input type="checkbox"/> 0 ~ 14 or 15 years old (pediatric)<br><input type="checkbox"/> 15 or 16 ~ 39 years old (adolescent/young adult)<br><input type="checkbox"/> 40 ~ 65 years old (middle-aged adult)<br><input type="checkbox"/> older than 65 years old (older adult) |
| Support Group or Forums for managing Cognitive Functioning Decline                     | <input type="checkbox"/> 0 ~ 14 or 15 years old (pediatric)<br><input type="checkbox"/> 15 or 16 ~ 39 years old (adolescent/young adult)<br><input type="checkbox"/> 40 ~ 65 years old (middle-aged adult)<br><input type="checkbox"/> older than 65 years old (older adult) |
| Booklets or Audio/Video Self-Help Materials for managing Cognitive Functioning Decline | <input type="checkbox"/> 0 ~ 14 or 15 years old (pediatric)<br><input type="checkbox"/> 15 or 16 ~ 39 years old (adolescent/young adult)<br><input type="checkbox"/> 40 ~ 65 years old (middle-aged adult)<br><input type="checkbox"/> older than 65 years old (older adult) |
| Pharmacologic service for managing Cognitive Functioning Decline                       | <input type="checkbox"/> 0 ~ 14 or 15 years old (pediatric)<br><input type="checkbox"/> 15 or 16 ~ 39 years old (adolescent/young adult)<br><input type="checkbox"/> 40 ~ 65 years old (middle-aged adult)<br><input type="checkbox"/> older than 65 years old (older adult) |

"[q9\_1i5o]" for managing Cognitive Functioning Decline

- 0 ~ 14 or 15 years old (pediatric)  
 15 or 16 ~ 39 years old (adolescent/young adult)  
 40 ~ 65 years old (middle-aged adult)  
 older than 65 years old (older adult)

Psychotherapy or Psychological Counseling for managing Insomnia, Sleep Difficulty, Fatigue

- 0 ~ 14 or 15 years old (pediatric)  
 15 or 16 ~ 39 years old (adolescent/young adult)  
 40 ~ 65 years old (middle-aged adult)  
 older than 65 years old (older adult)

Support Group or Forums for managing Insomnia, Sleep Difficulty, Fatigue

- 0 ~ 14 or 15 years old (pediatric)  
 15 or 16 ~ 39 years old (adolescent/young adult)  
 40 ~ 65 years old (middle-aged adult)  
 older than 65 years old (older adult)

Booklets or Audio/Video Self-Help Materials for managing Insomnia, Sleep Difficulty, Fatigue

- 0 ~ 14 or 15 years old (pediatric)  
 15 or 16 ~ 39 years old (adolescent/young adult)  
 40 ~ 65 years old (middle-aged adult)  
 older than 65 years old (older adult)

Pharmacologic service for managing Insomnia, Sleep Difficulty, Fatigue

- 0 ~ 14 or 15 years old (pediatric)  
 15 or 16 ~ 39 years old (adolescent/young adult)  
 40 ~ 65 years old (middle-aged adult)  
 older than 65 years old (older adult)

"[q9\_1j5o]" for managing Insomnia, Sleep Difficulty, Fatigue

- 0 ~ 14 or 15 years old (pediatric)  
 15 or 16 ~ 39 years old (adolescent/young adult)  
 40 ~ 65 years old (middle-aged adult)  
 older than 65 years old (older adult)

Psychotherapy or Psychological Counseling for managing Financial Concern Stemming from Cancer Care

- 0 ~ 14 or 15 years old (pediatric)  
 15 or 16 ~ 39 years old (adolescent/young adult)  
 40 ~ 65 years old (middle-aged adult)  
 older than 65 years old (older adult)

Support Group or Forums for managing Financial Concern Stemming from Cancer Care

- 0 ~ 14 or 15 years old (pediatric)  
 15 or 16 ~ 39 years old (adolescent/young adult)  
 40 ~ 65 years old (middle-aged adult)  
 older than 65 years old (older adult)

Booklets or Audio/Video Self-Help Materials for managing Financial Concern Stemming from Cancer Care

- 0 ~ 14 or 15 years old (pediatric)  
 15 or 16 ~ 39 years old (adolescent/young adult)  
 40 ~ 65 years old (middle-aged adult)  
 older than 65 years old (older adult)

Pharmacologic service for managing Financial Concern Stemming from Cancer Care

- 0 ~ 14 or 15 years old (pediatric)  
 15 or 16 ~ 39 years old (adolescent/young adult)  
 40 ~ 65 years old (middle-aged adult)  
 older than 65 years old (older adult)

"[q9\_1k5o]" for managing Financial Concern Stemming from Cancer Care

- 0 ~ 14 or 15 years old (pediatric)  
 15 or 16 ~ 39 years old (adolescent/young adult)  
 40 ~ 65 years old (middle-aged adult)  
 older than 65 years old (older adult)

|                                                                                                                    |                                                                                                                                                                                                                                                                              |
|--------------------------------------------------------------------------------------------------------------------|------------------------------------------------------------------------------------------------------------------------------------------------------------------------------------------------------------------------------------------------------------------------------|
| Psychotherapy or Psychological Counseling for managing Personal Care for Daily Living                              | <input type="checkbox"/> 0 ~ 14 or 15 years old (pediatric)<br><input type="checkbox"/> 15 or 16 ~ 39 years old (adolescent/young adult)<br><input type="checkbox"/> 40 ~ 65 years old (middle-aged adult)<br><input type="checkbox"/> older than 65 years old (older adult) |
| Support Group or Forums for managing Personal Care for Daily Living                                                | <input type="checkbox"/> 0 ~ 14 or 15 years old (pediatric)<br><input type="checkbox"/> 15 or 16 ~ 39 years old (adolescent/young adult)<br><input type="checkbox"/> 40 ~ 65 years old (middle-aged adult)<br><input type="checkbox"/> older than 65 years old (older adult) |
| Booklets or Audio/Video Self-Help Materials for managing Personal Care for Daily Living                            | <input type="checkbox"/> 0 ~ 14 or 15 years old (pediatric)<br><input type="checkbox"/> 15 or 16 ~ 39 years old (adolescent/young adult)<br><input type="checkbox"/> 40 ~ 65 years old (middle-aged adult)<br><input type="checkbox"/> older than 65 years old (older adult) |
| Pharmacologic service for managing Personal Care for Daily Living                                                  | <input type="checkbox"/> 0 ~ 14 or 15 years old (pediatric)<br><input type="checkbox"/> 15 or 16 ~ 39 years old (adolescent/young adult)<br><input type="checkbox"/> 40 ~ 65 years old (middle-aged adult)<br><input type="checkbox"/> older than 65 years old (older adult) |
| "[q9_1l5o]" for managing Personal Care for Daily Living                                                            | <input type="checkbox"/> 0 ~ 14 or 15 years old (pediatric)<br><input type="checkbox"/> 15 or 16 ~ 39 years old (adolescent/young adult)<br><input type="checkbox"/> 40 ~ 65 years old (middle-aged adult)<br><input type="checkbox"/> older than 65 years old (older adult) |
| Psychotherapy or Psychological Counseling for managing Balancing Other Social Roles with a New Role as a Patient   | <input type="checkbox"/> 0 ~ 14 or 15 years old (pediatric)<br><input type="checkbox"/> 15 or 16 ~ 39 years old (adolescent/young adult)<br><input type="checkbox"/> 40 ~ 65 years old (middle-aged adult)<br><input type="checkbox"/> older than 65 years old (older adult) |
| Support Group or Forums for managing Balancing Other Social Roles with a New Role as a Patient                     | <input type="checkbox"/> 0 ~ 14 or 15 years old (pediatric)<br><input type="checkbox"/> 15 or 16 ~ 39 years old (adolescent/young adult)<br><input type="checkbox"/> 40 ~ 65 years old (middle-aged adult)<br><input type="checkbox"/> older than 65 years old (older adult) |
| Booklets or Audio/Video Self-Help Materials for managing Balancing Other Social Roles with a New Role as a Patient | <input type="checkbox"/> 0 ~ 14 or 15 years old (pediatric)<br><input type="checkbox"/> 15 or 16 ~ 39 years old (adolescent/young adult)<br><input type="checkbox"/> 40 ~ 65 years old (middle-aged adult)<br><input type="checkbox"/> older than 65 years old (older adult) |
| Pharmacologic service for managing Balancing Other Social Roles with a New Role as a Patient                       | <input type="checkbox"/> 0 ~ 14 or 15 years old (pediatric)<br><input type="checkbox"/> 15 or 16 ~ 39 years old (adolescent/young adult)<br><input type="checkbox"/> 40 ~ 65 years old (middle-aged adult)<br><input type="checkbox"/> older than 65 years old (older adult) |
| "[q9_1m5o]" for managing Balancing Other Social Roles with a New Role as a Patient                                 | <input type="checkbox"/> 0 ~ 14 or 15 years old (pediatric)<br><input type="checkbox"/> 15 or 16 ~ 39 years old (adolescent/young adult)<br><input type="checkbox"/> 40 ~ 65 years old (middle-aged adult)<br><input type="checkbox"/> older than 65 years old (older adult) |
| Psychotherapy or Psychological Counseling for managing "[q5_1an1]"                                                 | <input type="checkbox"/> 0 ~ 14 or 15 years old (pediatric)<br><input type="checkbox"/> 15 or 16 ~ 39 years old (adolescent/young adult)<br><input type="checkbox"/> 40 ~ 65 years old (middle-aged adult)<br><input type="checkbox"/> older than 65 years old (older adult) |



---

|                                                  |                                                                                                                                                                                                                                                                              |
|--------------------------------------------------|------------------------------------------------------------------------------------------------------------------------------------------------------------------------------------------------------------------------------------------------------------------------------|
| Support Group or Forums for managing "[q5_1an1]" | <input type="checkbox"/> 0 ~ 14 or 15 years old (pediatric)<br><input type="checkbox"/> 15 or 16 ~ 39 years old (adolescent/young adult)<br><input type="checkbox"/> 40 ~ 65 years old (middle-aged adult)<br><input type="checkbox"/> older than 65 years old (older adult) |
|--------------------------------------------------|------------------------------------------------------------------------------------------------------------------------------------------------------------------------------------------------------------------------------------------------------------------------------|

---

|                                                                      |                                                                                                                                                                                                                                                                              |
|----------------------------------------------------------------------|------------------------------------------------------------------------------------------------------------------------------------------------------------------------------------------------------------------------------------------------------------------------------|
| Booklets or Audio/Video Self-Help Materials for managing "[q5_1an1]" | <input type="checkbox"/> 0 ~ 14 or 15 years old (pediatric)<br><input type="checkbox"/> 15 or 16 ~ 39 years old (adolescent/young adult)<br><input type="checkbox"/> 40 ~ 65 years old (middle-aged adult)<br><input type="checkbox"/> older than 65 years old (older adult) |
|----------------------------------------------------------------------|------------------------------------------------------------------------------------------------------------------------------------------------------------------------------------------------------------------------------------------------------------------------------|

---

|                                                |                                                                                                                                                                                                                                                                              |
|------------------------------------------------|------------------------------------------------------------------------------------------------------------------------------------------------------------------------------------------------------------------------------------------------------------------------------|
| Pharmacologic service for managing "[q5_1an1]" | <input type="checkbox"/> 0 ~ 14 or 15 years old (pediatric)<br><input type="checkbox"/> 15 or 16 ~ 39 years old (adolescent/young adult)<br><input type="checkbox"/> 40 ~ 65 years old (middle-aged adult)<br><input type="checkbox"/> older than 65 years old (older adult) |
|------------------------------------------------|------------------------------------------------------------------------------------------------------------------------------------------------------------------------------------------------------------------------------------------------------------------------------|

---

|                                      |                                                                                                                                                                                                                                                                              |
|--------------------------------------|------------------------------------------------------------------------------------------------------------------------------------------------------------------------------------------------------------------------------------------------------------------------------|
| "[q9_1n5o]" for managing "[q5_1an1]" | <input type="checkbox"/> 0 ~ 14 or 15 years old (pediatric)<br><input type="checkbox"/> 15 or 16 ~ 39 years old (adolescent/young adult)<br><input type="checkbox"/> 40 ~ 65 years old (middle-aged adult)<br><input type="checkbox"/> older than 65 years old (older adult) |
|--------------------------------------|------------------------------------------------------------------------------------------------------------------------------------------------------------------------------------------------------------------------------------------------------------------------------|

---

|                                                                    |                                                                                                                                                                                                                                                                              |
|--------------------------------------------------------------------|------------------------------------------------------------------------------------------------------------------------------------------------------------------------------------------------------------------------------------------------------------------------------|
| Psychotherapy or Psychological Counseling for managing "[q5_1ao1]" | <input type="checkbox"/> 0 ~ 14 or 15 years old (pediatric)<br><input type="checkbox"/> 15 or 16 ~ 39 years old (adolescent/young adult)<br><input type="checkbox"/> 40 ~ 65 years old (middle-aged adult)<br><input type="checkbox"/> older than 65 years old (older adult) |
|--------------------------------------------------------------------|------------------------------------------------------------------------------------------------------------------------------------------------------------------------------------------------------------------------------------------------------------------------------|

---

|                                                  |                                                                                                                                                                                                                                                                              |
|--------------------------------------------------|------------------------------------------------------------------------------------------------------------------------------------------------------------------------------------------------------------------------------------------------------------------------------|
| Support Group or Forums for managing "[q5_1ao1]" | <input type="checkbox"/> 0 ~ 14 or 15 years old (pediatric)<br><input type="checkbox"/> 15 or 16 ~ 39 years old (adolescent/young adult)<br><input type="checkbox"/> 40 ~ 65 years old (middle-aged adult)<br><input type="checkbox"/> older than 65 years old (older adult) |
|--------------------------------------------------|------------------------------------------------------------------------------------------------------------------------------------------------------------------------------------------------------------------------------------------------------------------------------|

---

|                                                                      |                                                                                                                                                                                                                                                                              |
|----------------------------------------------------------------------|------------------------------------------------------------------------------------------------------------------------------------------------------------------------------------------------------------------------------------------------------------------------------|
| Booklets or Audio/Video Self-Help Materials for managing "[q5_1ao1]" | <input type="checkbox"/> 0 ~ 14 or 15 years old (pediatric)<br><input type="checkbox"/> 15 or 16 ~ 39 years old (adolescent/young adult)<br><input type="checkbox"/> 40 ~ 65 years old (middle-aged adult)<br><input type="checkbox"/> older than 65 years old (older adult) |
|----------------------------------------------------------------------|------------------------------------------------------------------------------------------------------------------------------------------------------------------------------------------------------------------------------------------------------------------------------|

---

|                                                |                                                                                                                                                                                                                                                                              |
|------------------------------------------------|------------------------------------------------------------------------------------------------------------------------------------------------------------------------------------------------------------------------------------------------------------------------------|
| Pharmacologic service for managing "[q5_1ao1]" | <input type="checkbox"/> 0 ~ 14 or 15 years old (pediatric)<br><input type="checkbox"/> 15 or 16 ~ 39 years old (adolescent/young adult)<br><input type="checkbox"/> 40 ~ 65 years old (middle-aged adult)<br><input type="checkbox"/> older than 65 years old (older adult) |
|------------------------------------------------|------------------------------------------------------------------------------------------------------------------------------------------------------------------------------------------------------------------------------------------------------------------------------|

---

|                                      |                                                                                                                                                                                                                                                                              |
|--------------------------------------|------------------------------------------------------------------------------------------------------------------------------------------------------------------------------------------------------------------------------------------------------------------------------|
| "[q9_1o5o]" for managing "[q5_1ao1]" | <input type="checkbox"/> 0 ~ 14 or 15 years old (pediatric)<br><input type="checkbox"/> 15 or 16 ~ 39 years old (adolescent/young adult)<br><input type="checkbox"/> 40 ~ 65 years old (middle-aged adult)<br><input type="checkbox"/> older than 65 years old (older adult) |
|--------------------------------------|------------------------------------------------------------------------------------------------------------------------------------------------------------------------------------------------------------------------------------------------------------------------------|

---

|                                                                    |                                                                                                                                                                                                                                                                              |
|--------------------------------------------------------------------|------------------------------------------------------------------------------------------------------------------------------------------------------------------------------------------------------------------------------------------------------------------------------|
| Psychotherapy or Psychological Counseling for managing "[q5_1ap1]" | <input type="checkbox"/> 0 ~ 14 or 15 years old (pediatric)<br><input type="checkbox"/> 15 or 16 ~ 39 years old (adolescent/young adult)<br><input type="checkbox"/> 40 ~ 65 years old (middle-aged adult)<br><input type="checkbox"/> older than 65 years old (older adult) |
|--------------------------------------------------------------------|------------------------------------------------------------------------------------------------------------------------------------------------------------------------------------------------------------------------------------------------------------------------------|

---

|                                                  |                                                                                                                                                                                                                                                                              |
|--------------------------------------------------|------------------------------------------------------------------------------------------------------------------------------------------------------------------------------------------------------------------------------------------------------------------------------|
| Support Group or Forums for managing "[q5_1ap1]" | <input type="checkbox"/> 0 ~ 14 or 15 years old (pediatric)<br><input type="checkbox"/> 15 or 16 ~ 39 years old (adolescent/young adult)<br><input type="checkbox"/> 40 ~ 65 years old (middle-aged adult)<br><input type="checkbox"/> older than 65 years old (older adult) |
|--------------------------------------------------|------------------------------------------------------------------------------------------------------------------------------------------------------------------------------------------------------------------------------------------------------------------------------|

---

10/24/2018 7:05pm

projectredcap.org

The logo for REDCap, featuring the word "REDCap" in a bold, sans-serif font. The "R" is red, and the "E", "D", "C", and "a" are black. The "p" is also black. To the right of the text is a red circular icon with a white shape inside, resembling a stylized 'C' or a medical symbol.

|                                                                      |                                                                                                                                                                                                                                                                              |
|----------------------------------------------------------------------|------------------------------------------------------------------------------------------------------------------------------------------------------------------------------------------------------------------------------------------------------------------------------|
| Booklets or Audio/Video Self-Help Materials for managing "[q5_1ap1]" | <input type="checkbox"/> 0 ~ 14 or 15 years old (pediatric)<br><input type="checkbox"/> 15 or 16 ~ 39 years old (adolescent/young adult)<br><input type="checkbox"/> 40 ~ 65 years old (middle-aged adult)<br><input type="checkbox"/> older than 65 years old (older adult) |
| Pharmacologic service for managing "[q5_1ap1]"                       | <input type="checkbox"/> 0 ~ 14 or 15 years old (pediatric)<br><input type="checkbox"/> 15 or 16 ~ 39 years old (adolescent/young adult)<br><input type="checkbox"/> 40 ~ 65 years old (middle-aged adult)<br><input type="checkbox"/> older than 65 years old (older adult) |
| "[q9_1p5o]" for managing "[q5_1ap1]"                                 | <input type="checkbox"/> 0 ~ 14 or 15 years old (pediatric)<br><input type="checkbox"/> 15 or 16 ~ 39 years old (adolescent/young adult)<br><input type="checkbox"/> 40 ~ 65 years old (middle-aged adult)<br><input type="checkbox"/> older than 65 years old (older adult) |
| Psychotherapy or Psychological Counseling for managing "[q5_1aq1]"   | <input type="checkbox"/> 0 ~ 14 or 15 years old (pediatric)<br><input type="checkbox"/> 15 or 16 ~ 39 years old (adolescent/young adult)<br><input type="checkbox"/> 40 ~ 65 years old (middle-aged adult)<br><input type="checkbox"/> older than 65 years old (older adult) |
| Support Group or Forums for managing "[q5_1aq1]"                     | <input type="checkbox"/> 0 ~ 14 or 15 years old (pediatric)<br><input type="checkbox"/> 15 or 16 ~ 39 years old (adolescent/young adult)<br><input type="checkbox"/> 40 ~ 65 years old (middle-aged adult)<br><input type="checkbox"/> older than 65 years old (older adult) |
| Booklets or Audio/Video Self-Help Materials for managing "[q5_1aq1]" | <input type="checkbox"/> 0 ~ 14 or 15 years old (pediatric)<br><input type="checkbox"/> 15 or 16 ~ 39 years old (adolescent/young adult)<br><input type="checkbox"/> 40 ~ 65 years old (middle-aged adult)<br><input type="checkbox"/> older than 65 years old (older adult) |
| Pharmacologic service for managing "[q5_1aq1]"                       | <input type="checkbox"/> 0 ~ 14 or 15 years old (pediatric)<br><input type="checkbox"/> 15 or 16 ~ 39 years old (adolescent/young adult)<br><input type="checkbox"/> 40 ~ 65 years old (middle-aged adult)<br><input type="checkbox"/> older than 65 years old (older adult) |
| "[q9_1q5o]" for managing "[q5_1aq1]"                                 | <input type="checkbox"/> 0 ~ 14 or 15 years old (pediatric)<br><input type="checkbox"/> 15 or 16 ~ 39 years old (adolescent/young adult)<br><input type="checkbox"/> 40 ~ 65 years old (middle-aged adult)<br><input type="checkbox"/> older than 65 years old (older adult) |
| Psychotherapy or Psychological Counseling for managing "[q5_1ar1]"   | <input type="checkbox"/> 0 ~ 14 or 15 years old (pediatric)<br><input type="checkbox"/> 15 or 16 ~ 39 years old (adolescent/young adult)<br><input type="checkbox"/> 40 ~ 65 years old (middle-aged adult)<br><input type="checkbox"/> older than 65 years old (older adult) |
| Support Group or Forums for managing "[q5_1ar1]"                     | <input type="checkbox"/> 0 ~ 14 or 15 years old (pediatric)<br><input type="checkbox"/> 15 or 16 ~ 39 years old (adolescent/young adult)<br><input type="checkbox"/> 40 ~ 65 years old (middle-aged adult)<br><input type="checkbox"/> older than 65 years old (older adult) |
| Booklets or Audio/Video Self-Help Materials for managing "[q5_1ar1]" | <input type="checkbox"/> 0 ~ 14 or 15 years old (pediatric)<br><input type="checkbox"/> 15 or 16 ~ 39 years old (adolescent/young adult)<br><input type="checkbox"/> 40 ~ 65 years old (middle-aged adult)<br><input type="checkbox"/> older than 65 years old (older adult) |



---

Pharmacologic service for managing "[q5\_1ar1]"

- 0 ~ 14 or 15 years old (pediatric)
- 15 or 16 ~ 39 years old (adolescent/young adult)
- 40 ~ 65 years old (middle-aged adult)
- older than 65 years old (older adult)

---

"[q9\_1r5o]" for managing "[q5\_1ar1]"

- 0 ~ 14 or 15 years old (pediatric)
- 15 or 16 ~ 39 years old (adolescent/young adult)
- 40 ~ 65 years old (middle-aged adult)
- older than 65 years old (older adult)

**Q10. How often do you or someone else at your institution communicate with family members/caregivers as part of the patient's individual treatment? (e.g., to provide psychoeducation, enlist assistance in supporting the patient, offer a family meeting to discuss psychosocial treatment plan)**

- Regularly
- Occasionally
- Rarely
- Never

**Section 5. Family Members and Family Caregivers - Their Patients' Age Groups Across Illness Trajectory**

Q11. Do you work with family members or family caregivers of cancer patients/survivors?

- Yes
- No

**Q11.1. This question asks you how much of your time and effort you spend for family members or family caregivers of cancer patients/survivors who are in different phases of their illness trajectory, such as patients who are (a) recently diagnosed or in treatment, (b) in remission and no longer receiving treatment, or (c) in end-of-life care.**

**In a typical month of your work that are related to family members or family caregivers of cancer patients/survivors, does the proportion of time and effort you spend with the following groups of family members/caregivers differ depending on their patient's age group?**

**For each item below, if the proportion of time and effort you spend with family members/caregivers differs depending on the age group, select "Yes, proportion differs depending on their patients' age group."**

**If the proportion of time and effort you spend with family members/caregivers are the same for all age groups of their patients/survivors, select "No, proportion is the same for all patient age groups". Then write the proportion in the box next to, "Please write the proportion for all patient age groups."**

Family members or family caregivers of cancer patients/survivors who are recently diagnosed or in treatment

- Yes, proportion differs depending on their patient's age group  
 No, proportion is the same for family members/caregivers of all patient age groups

Please write the proportion for family members/caregivers of all patient age groups

\_\_\_\_\_  
(%)

Family members or family caregivers of cancer patients/survivors who are off treatment (in remission)

- Yes, proportion differs depending on their patient's age group  
 No, proportion is the same for family members/caregivers of all patient age groups

Please write the proportion for family members/caregivers of all patient age groups

\_\_\_\_\_  
(%)

Family members or family caregivers of cancer patients/survivors who are in end-of-life care

- Yes, proportion differs depending on their patient's age group  
 No, proportion is the same for family members/caregivers of all patient age groups

Please write the proportion for family members/caregivers of all patient age groups

\_\_\_\_\_  
(%)

**Q11.2. A. In a typical month of your work that are related to family members/caregivers of cancer patients/survivors, what proportion of that time and effort do you spend with family members/caregivers of cancer patients who are recently diagnosed or in treatment in the following age groups?**

**Please select the age group(s) which applies to write the percentage of time and effort you spend in a typical month for that age group you work with.**

Family members/caregivers of 0 ~ 14 or 15 years old patients (pediatric group)

\_\_\_\_\_ (%)

Family members/caregivers of 15 or 16 ~ 39 years old patients (adolescent and young adult group)

\_\_\_\_\_ (%)

Family members/caregivers of 40 ~ 65 years old patients (middle-aged adult group)

\_\_\_\_\_ (%)

Family members/caregivers of older than 65 years old patients (older adult group)

\_\_\_\_\_ (%)

**Q11.2. B. In a typical month of your work that are related to family members/caregivers of cancer patients/survivors, what proportion of that time and effort do you spend with family members/caregivers of cancer patients who are in remission and no longer receiving treatment in the following age groups?**

**Please select the age group(s) which applies to write the percentage of time and effort you spend in a typical month for that age group you work with.**

Family members/caregivers of 0 ~ 14 or 15 years old patients (pediatric group)

\_\_\_\_\_ (%)

Family members/caregivers of 15 or 16 ~ 39 years old patients (adolescent and young adult group)

\_\_\_\_\_ (%)

Family members/caregivers of 40 ~ 65 years old patients (middle-aged adult group)

\_\_\_\_\_ (%)

Family members/caregivers of older than 65 years old patients (older adult group)

\_\_\_\_\_ (%)

**Q11.2.C. In a typical month of your work that are related to family members/caregivers of cancer patients/survivors, what proportion of that time and effort do you spend with family members/caregivers of cancer patients who are in end-of-life care in the following age groups?**

**Please select the age group(s) which applies to write the percentage of time and effort you spend in a typical month for that age group you work with.**

Family members/caregivers of 0 ~ 14 or 15 years old patients (pediatric group)

\_\_\_\_\_ (%)

Family members/caregivers of 15 or 16 ~ 39 years old patients (adolescent and young adult group)

\_\_\_\_\_ (%)

Family members/caregivers of 40 ~ 65 years old patients (middle-aged adult group)

\_\_\_\_\_ (%)

Family members/caregivers of older than 65 years old patients (older adult group)

\_\_\_\_\_ (%)

**Q12.1. In your work with family members/caregivers of cancer patients or survivors, please indicate that the family members/caregivers' concerns below are either applicable for all family members/caregivers of all patient age groups you are working with, applicable to none of the family members/caregivers, or whether your response would vary depending on their patients' age group (pediatric, vs adolescent and young adult, vs middle aged adult, vs older adult).**

|                                                                                                            | Applicable for family caregivers of patients in all age groups | Not Applicable for any family caregivers | It depends on their patient's age group |
|------------------------------------------------------------------------------------------------------------|----------------------------------------------------------------|------------------------------------------|-----------------------------------------|
| Emotional distress                                                                                         | <input type="radio"/>                                          | <input type="radio"/>                    | <input type="radio"/>                   |
| Finding meaning, spiritual concerns                                                                        | <input type="radio"/>                                          | <input type="radio"/>                    | <input type="radio"/>                   |
| Family relationships (communication problems, conflict management, concerns about children or adolescents) | <input type="radio"/>                                          | <input type="radio"/>                    | <input type="radio"/>                   |
| Sexuality, intimacy                                                                                        | <input type="radio"/>                                          | <input type="radio"/>                    | <input type="radio"/>                   |
| Social relationships/isolation                                                                             | <input type="radio"/>                                          | <input type="radio"/>                    | <input type="radio"/>                   |
| Medical care related to cancer                                                                             | <input type="radio"/>                                          | <input type="radio"/>                    | <input type="radio"/>                   |
| Cancer-related symptom management                                                                          | <input type="radio"/>                                          | <input type="radio"/>                    | <input type="radio"/>                   |
| Physical functioning decline                                                                               | <input type="radio"/>                                          | <input type="radio"/>                    | <input type="radio"/>                   |
| Cognitive functioning decline                                                                              | <input type="radio"/>                                          | <input type="radio"/>                    | <input type="radio"/>                   |
| Insomnia, sleep difficulty, fatigue                                                                        | <input type="radio"/>                                          | <input type="radio"/>                    | <input type="radio"/>                   |
| Financial concern stemming from cancer care                                                                | <input type="radio"/>                                          | <input type="radio"/>                    | <input type="radio"/>                   |
| Personal care for daily living                                                                             | <input type="radio"/>                                          | <input type="radio"/>                    | <input type="radio"/>                   |
| Balancing other social roles with a new role as a family caregiver                                         | <input type="radio"/>                                          | <input type="radio"/>                    | <input type="radio"/>                   |
| Grief/bereavement                                                                                          | <input type="radio"/>                                          | <input type="radio"/>                    | <input type="radio"/>                   |
| Something else not listed?                                                                                 | <input type="radio"/>                                          | <input type="radio"/>                    | <input type="radio"/>                   |

(If not, click "Not Applicable for any group". If so, click either "Applicable for all age groups" or "It depends on the age group". Then, you will be asked to write what it is.)

Please specify what "something else" is

---



---

|                            | Applicable for family caregivers of patients in all age groups | Not Applicable for any family caregivers | It depends on their patient's age group |
|----------------------------|----------------------------------------------------------------|------------------------------------------|-----------------------------------------|
| Something else not listed? | <input checked="" type="radio"/>                               | <input type="radio"/>                    | <input type="radio"/>                   |

(First choose if this is applicable to any age group. Then, you will be asked to write what it is.)

---

Please specify what "something else" is \_\_\_\_\_

---

|                            | Applicable for family caregivers of patients in all age groups | Not Applicable for any family caregivers | It depends on their patient's age group |
|----------------------------|----------------------------------------------------------------|------------------------------------------|-----------------------------------------|
| Something else not listed? | <input type="radio"/>                                          | <input type="radio"/>                    | <input type="radio"/>                   |

(First choose if this is applicable to any age group. Then, you will be asked to write what it is.)

---

Please specify what "something else" is \_\_\_\_\_

---

|                            | Applicable for family caregivers of patients in all age groups | Not Applicable for any family caregivers | It depends on their patient's age group |
|----------------------------|----------------------------------------------------------------|------------------------------------------|-----------------------------------------|
| Something else not listed? | <input type="radio"/>                                          | <input type="radio"/>                    | <input type="radio"/>                   |

(First choose if this is applicable to any age group. Then, you will be asked to write what it is.)

---

Please specify what "something else" is \_\_\_\_\_

---

|                            | Applicable for family caregivers of patients in all age groups | Not Applicable for any family caregivers | It depends on their patient's age group |
|----------------------------|----------------------------------------------------------------|------------------------------------------|-----------------------------------------|
| Something else not listed? | <input type="radio"/>                                          | <input type="radio"/>                    | <input type="radio"/>                   |

(First choose if this is applicable to any age group. Then, you will be asked to write what it is.)

---

Please specify what "something else" is \_\_\_\_\_

**Q12.2. Now, please think about how much time and effort you spend in a typical month to address the following concerns of family members/caregivers of cancer patients/survivors. Does proportion of time and effort you spend in a typical month to address the following concerns differ depending on their patients' age group?**

**For each item below, if the proportion of time and effort you spend with family members/caregivers differs depending on their patient's age group, select "Yes, proportion differs depending on their patient's age group."**

**If the proportion of time and effort you spend with family members/caregivers are the same for all age groups of patients/survivors, select "No, proportion is the same for all patient age groups". Then, write the proportion in the box next to, "Please write the proportion for all patient age groups."**

**If any concern is applicable but you do not spend any time and effort on that concern, please write "0".**

Emotional distress

- Yes, proportion differs depending on their patient's age group  
 No, proportion is the same for all patient age groups

Please write the proportion for family members/caregivers of all age groups

\_\_\_\_\_ (%)

Finding meaning, spiritual concerns

- Yes, proportion differs depending on their patient's age group  
 No, proportion is the same for all patient age groups

Please write the proportion for family members/caregivers of all age groups

\_\_\_\_\_ (%)

Family relationships (communication problems, conflict management, concerns about children or adolescents)

- Yes, proportion differs depending on their patient's age group  
 No, proportion is the same for all patient age groups

Please write the proportion for family members/caregivers of all age groups

\_\_\_\_\_ (%)

Sexuality, intimacy

- Yes, proportion differs depending on their patient's age group  
 No, proportion is the same for all patient age groups

Please write the proportion for family members/caregivers of all age groups

\_\_\_\_\_ (%)

---

Social relationships/isolation

Yes, proportion differs depending on their patient's age group

No, proportion is the same for all patient age groups

---

Please write the proportion for family members/caregivers of all age groups

\_\_\_\_\_

(%)

---

Medical care related to cancer

- Yes, proportion differs depending on their patient's age group
- No, proportion is the same for all patient age groups
- 

Please write the proportion for family members/caregivers of all age groups

\_\_\_\_\_

(%)

---

Cancer-related symptom management

- Yes, proportion differs depending on their patient's age group
- No, proportion is the same for all patient age groups
- 

Please write the proportion for family members/caregivers of all age groups

\_\_\_\_\_

(%)

---

Physical functioning decline

- Yes, proportion differs depending on their patient's age group
- No, proportion is the same for all patient age groups
- 

Please write the proportion for family members/caregivers of all age groups

\_\_\_\_\_

(%)

---

Cognitive functioning decline

- Yes, proportion differs depending on their patient's age group
- No, proportion is the same for all patient age groups
- 

Please write the proportion for family members/caregivers of all age groups

\_\_\_\_\_

(%)

---

Insomnia, sleep difficulty, fatigue

- Yes, proportion differs depending on their patient's age group
- No, proportion is the same for all patient age groups
- 

Please write the proportion for family members/caregivers of all age groups

\_\_\_\_\_

(%)

---

Financial concern stemming from cancer care

- Yes, proportion differs depending on their patient's age group
- No, proportion is the same for all patient age groups

Please write the proportion for family members/caregivers of all age groups

\_\_\_\_\_ (%)

Personal care for daily living

- Yes, proportion differs depending on their patient's age group  
 No, proportion is the same for all patient age groups

Please write the proportion for family members/caregivers of all age groups

\_\_\_\_\_ (%)

Balancing other social roles with a new role as a family caregiver

- Yes, proportion differs depending on their patient's age group  
 No, proportion is the same for all patient age groups

Please write the proportion for family members/caregivers of all age groups

\_\_\_\_\_ (%)

Grief/bereavement

- Yes, proportion differs depending on their patient's age group  
 No, proportion is the same for all patient age groups

Please write the proportion for family members/caregivers of all age groups

\_\_\_\_\_ (%)

"[q12\_1an1]"

- Yes, proportion differs depending on the age group  
 No, proportion is the same for all age groups

Please write the proportion for family members/caregivers of all age groups

\_\_\_\_\_ (%)

"[q12\_1ao1]"

- Yes, proportion differs depending on the age group  
 No, proportion is the same for all age groups

Please write the proportion for family members/caregivers of all age groups

\_\_\_\_\_ (%)

"[q12\_1ap1]"

- Yes, proportion differs depending on the age group  
 No, proportion is the same for all age groups

Please write the proportion for family members/caregivers of all age groups

\_\_\_\_\_ (%)

"[q12\_1aq1]"

- Yes, proportion differs depending on the age group  
 No, proportion is the same for all age groups

---

Please write the proportion for family members/caregivers of all age groups

\_\_\_\_\_

(%)

---

"[q12\_1ar1]"

- Yes, proportion differs depending on the age group
- No, proportion is the same for all age groups

---

Please write the proportion for family members/caregivers of all age groups

\_\_\_\_\_

**Q12.3. In your work with family members/caregivers of cancer patients and survivors who are in different age groups, please write the percentage of time and effort you spend in a typical month to address each concern for family members/caregivers of the patient's age group.**

**If you do not spend any time and effort on that concern for that age group, please write "0".**

Emotional distress of family members/caregivers of patients who are 0 ~ 14 or 15 years old (pediatric)

\_\_\_\_\_ (%)

Emotional distress of family members/caregivers of patients who are 15 or 16 ~ 39 years old (adolescent/young adult)

\_\_\_\_\_ (%)

Emotional distress of family members/caregivers of patients who are 40 ~ 65 years old (middle-aged adult)

\_\_\_\_\_ (%)

Emotional distress of family members/caregivers of patients who are older than 65 years old (older adult)

\_\_\_\_\_ (%)

Finding meaning, spiritual concerns of family members/caregivers of patients who are 0 ~ 14 or 15 years old (pediatric)

\_\_\_\_\_ (%)

Finding meaning, spiritual concerns of family members/caregivers of patients who are 15 or 16 ~ 39 years old (adolescent/young adult)

\_\_\_\_\_ (%)

Finding meaning, spiritual concerns of family members/caregivers of patients who are 40 ~ 65 years old (middle-aged adult)

\_\_\_\_\_ (%)

Finding meaning, spiritual concerns of family members/caregivers of patients who are older than 65 years old (older adult)

\_\_\_\_\_ (%)

Family relationships (communication problems, conflict management, concerns about children or adolescents) of family members/caregivers of patients who are 0 ~ 14 or 15 years old (pediatric)

\_\_\_\_\_ (%)

Family relationships (communication problems, conflict management, concerns about children or adolescents) of family members/caregivers of patients who are 15 or 16 ~ 39 years old (adolescent/young adult)

\_\_\_\_\_ (%)

Family relationships (communication problems, conflict management, concerns about children or adolescents) of family members/caregivers of patients who are 40 ~ 65 years old (middle-aged adult)

\_\_\_\_\_ (%)

---

Family relationships (communication problems, conflict management, concerns about children or adolescents) of family members/caregivers of patients who are older than 65 years old (older adult)

---

(%)

---

Sexuality, intimacy of family members/caregivers of patients who are 0 ~ 14 or 15 years old (pediatric)

---

(%)

---

Sexuality, intimacy of family members/caregivers of patients who are 15 or 16 ~ 39 years old (adolescent/young adult)

---

(%)

---

Sexuality, intimacy of family members/caregivers of patients who are 40 ~ 65 years old (middle-aged adult)

---

(%)

---

Sexuality, intimacy of family members/caregivers of patients who are older than 65 years old (older adult)

---

(%)

---

Social relationships/isolation of family members/caregivers of patients who are 0 ~ 14 or 15 years old (pediatric)

---

(%)

---

Social relationships/isolation of family members/caregivers of patients who are 15 or 16 ~ 39 years old (adolescent/young adult)

---

(%)

---

Social relationships/isolation of family members/caregivers of patients who are 40 ~ 65 years old (middle-aged adult)

---

(%)

---

Social relationships/isolation of family members/caregivers of patients who are older than 65 years old (older adult)

---

(%)

---

Medical care related to cancer of family members/caregivers of patients who are 0 ~ 14 or 15 years old (pediatric)

---

(%)

---

Medical care related to cancer of family members/caregivers of patients who are 15 or 16 ~ 39 years old (adolescent/young adult)

---

(%)

---

Medical care related to cancer of family members/caregivers of patients who are 40 ~ 65 years old (middle-aged adult)

---

(%)

---

Medical care related to cancer of family members/caregivers of patients who are older than 65 years old (older adult)

---

(%)

---

Cancer-related symptom management of family members/caregivers of patients who are 0 ~ 14 or 15 years old (pediatric)

---

(%)

---

Cancer-related symptom management of family members/caregivers of patients who are 15 or 16 ~ 39 years old (adolescent/young adult)

---

(%)

---

Cancer-related symptom management of family members/caregivers of patients who are 40 ~ 65 years old (middle-aged adult)

---

(%)

---

Cancer-related symptom management of family members/caregivers of patients who are older than 65 years old (older adult)

---

(%)

---

Physical functioning decline of family members/caregivers of patients who are 0 ~ 14 or 15 years old (pediatric)

---

(%)

---

Physical functioning decline of family members/caregivers of patients who are 15 or 16 ~ 39 years old (adolescent/young adult)

---

(%)

---

Physical functioning decline of family members/caregivers of patients who are 40 ~ 65 years old (middle-aged adult)

---

(%)

---

Physical functioning decline of family members/caregivers of patients who are older than 65 years old (older adult)

---

(%)

---

Cognitive functioning decline of family members/caregivers of patients who are 0 ~ 14 or 15 years old (pediatric)

---

(%)

---

Cognitive functioning decline of family members/caregivers of patients who are 15 or 16 ~ 39 years old (adolescent/young adult)

---

(%)

---

Cognitive functioning decline of family members/caregivers of patients who are 40 ~ 65 years old (middle-aged adult)

---

(%)

---

Cognitive functioning decline of family members/caregivers of patients who are older than 65 years old (older adult)

---

(%)

---

Insomnia, sleep difficulty, fatigue of family members/caregivers of patients who are 0 ~ 14 or 15 years old (pediatric)

---

(%)

---

Insomnia, sleep difficulty, fatigue of family members/caregivers of patients who are 15 or 16 ~ 39 years old (adolescent/young adult)

---

(%)

---

Insomnia, sleep difficulty, fatigue of family members/caregivers of patients who are 40 ~ 65 years old (middle-aged adult)

---

(%)

---



---

|                                                                                                                                                |           |
|------------------------------------------------------------------------------------------------------------------------------------------------|-----------|
| Insomnia, sleep difficulty, fatigue of family members/caregivers of patients who are older than 65 years old (older adult)                     | _____ (%) |
| Financial concern stemming from cancer care of family members/caregivers of patients who are 0 ~ 14 or 15 years old (pediatric)                | _____ (%) |
| Financial concern stemming from cancer care of family members/caregivers of patients who are 15 or 16 ~ 39 years old (adolescent/young adult)  | _____ (%) |
| Financial concern stemming from cancer care of family members/caregivers of patients who are 40 ~ 65 years old (middle-aged adult)             | _____ (%) |
| Financial concern stemming from cancer care of family members/caregivers of patients who are older than 65 years old (older adult)             | _____ (%) |
| Personal care for daily living of family members/caregivers of patients who are 0 ~ 14 or 15 years old (pediatric)                             | _____ (%) |
| Personal care for daily living of family members/caregivers of patients who are 15 or 16 ~ 39 years old (adolescent/young adult)               | _____ (%) |
| Personal care for daily living of family members/caregivers of patients who are 40 ~ 65 years old (middle-aged adult)                          | _____ (%) |
| Personal care for daily living of family members/caregivers of patients who are older than 65 years old (older adult)                          | _____ (%) |
| Balancing other social roles with a new role as family members/caregivers of patients who are 0 ~ 14 or 15 years old (pediatric)               | _____ (%) |
| Balancing other social roles with a new role as family members/caregivers of patients who are 15 or 16 ~ 39 years old (adolescent/young adult) | _____ (%) |
| Balancing other social roles with a new role as family members/caregivers of patients who are 40 ~ 65 years old (middle-aged adult)            | _____ (%) |
| Balancing other social roles with a new role as family members/caregivers of patients who are older than 65 years old (older adult)            | _____ (%) |
| Grief/bereavement of family members/caregivers of patients who are 0 ~ 14 or 15 years old (pediatric)                                          | _____ (%) |

---

---

Grief/bereavement of family members/caregivers of patients who are 15 or 16 ~ 39 years old (adolescent/young adult)

---

(%)

---

Grief/bereavement of family members/caregivers of patients who are 40 ~ 65 years old (middle-aged adult)

---

(%)

---

Grief/bereavement of family members/caregivers of patients who are older than 65 years old (older adult)

---

(%)

---

"[q12\_1an1]" of family members/caregivers of patients who are 0 ~ 14 or 15 years old (pediatric)

---

(%)

---

"[q12\_1an1]" of family members/caregivers of patients who are 15 or 16 ~ 39 years old (adolescent/young adult)

---

(%)

---

"[q12\_1an1]" of family members/caregivers of patients who are 40 ~ 65 years old (middle-aged adult)

---

(%)

---

"[q12\_1an1]" of family members/caregivers of patients who are older than 65 years old (older adult)

---

(%)

---

"[q12\_1ao1]" of family members/caregivers of patients who are 0 ~ 14 or 15 years old (pediatric)

---

(%)

---

"[q12\_1ao1]" of family members/caregivers of patients who are 15 or 16 ~ 39 years old (adolescent/young adult)

---

(%)

---

"[q12\_1ao1]" of family members/caregivers of patients who are 40 ~ 65 years old (middle-aged adult)

---

(%)

---

"[q12\_1ao1]" of family members/caregivers of patients who are older than 65 years old (older adult)

---

(%)

---

"[q12\_1ap1]" of family members/caregivers of patients who are 0 ~ 14 or 15 years old (pediatric)

---

(%)

---

"[q12\_1ap1]" of family members/caregivers of patients who are 15 or 16 ~ 39 years old (adolescent/young adult)

---

(%)

---

"[q12\_1ap1]" of family members/caregivers of patients who are 40 ~ 65 years old (middle-aged adult)

---

(%)

---

---

"[q12\_1ap1]" of family members/caregivers of patients  
who are older than 65 years old (older adult)

---

(%)

---

"[q12\_1aq1]" of family members/caregivers of patients  
who are 0 ~ 14 or 15 years old (pediatric)

---

(%)

---

"[q12\_1aq1]" of family members/caregivers of patients  
who are 15 or 16 ~ 39 years old (adolescent/young  
adult)

---

(%)

---

"[q12\_1aq1]" of family members/caregivers of patients  
who are 40 ~ 65 years old (middle-aged adult)

---

(%)

---

"[q12\_1aq1]" of family members/caregivers of patients  
who are older than 65 years old (older adult)

---

(%)

---

"[q12\_1ar1]" of family members/caregivers of patients  
who are 0 ~ 14 or 15 years old (pediatric)

---

(%)

---

"[q12\_1ar1]" of family members/caregivers of patients  
who are 15 or 16 ~ 39 years old (adolescent/young  
adult)

---

(%)

---

"[q12\_1ar1]" of family members/caregivers of patients  
who are 40 ~ 65 years old (middle-aged adult)

---

(%)

---

"[q12\_1ar1]" of family members/caregivers of patients  
who are older than 65 years old (older adult)

---

(%)

---

**Section 6: Family Members and Family Caregivers - Understanding Their Concerns**

The next couple of questions are to learn about the concerns of family members or family caregivers.

- Skip
- Continue or Next

If you do wish to skip this section, please select "Skip" in the right column, then click "Next Page" in the bottom of this page, which will bring you to the next section of the survey.

If you want to continue to the family caregivers' concerns, please select "Continue" in the right column, then click "Next Page" in the bottom of this page, which will bring you to the next question.

**Q13. What approaches are used by you or your institution to identify families/caregivers in need of support? (Mark all that are applicable)**

- No specific measurement or assessment done
- Questionnaire distress screening
- Interview and discussion
- Referral by oncology provider/nurse
- Self-referral

---

Please indicate type of questionnaire administered

\_\_\_\_\_

**Q14.1. Now we are asking your opinion about the concerns of family members/caregivers being addressed properly or the needs of family members/caregivers being met. First, please evaluate if the degree to which you think each of the concerns of family members/caregivers patients/survivors is addressed properly or the need is met, differs depending on their patient's age group.**

**For each item below, if the degree that the family members'/caregivers' concern being addressed or the need being met differs depending on the patient's age group, select "Yes, the degree differs depending on their patient's age group."**

**If the degree that the concern is being addressed or the need being met is the same for all age groups of patients/survivors, select "No, the degree is the same for all age groups." Then, write the degree in the box next to, "Please write the degree for all age groups." For each concern, use a scale from 100 (the concern is completely addressed; the need is fully being met) to 0 (the concern is completely unaddressed; the need is not being met at all).**

Emotional distress

- Yes, degree differs depending on their patient's age group  
 No, degree is the same for all patient age groups

Please write the degree for family members/caregivers of all patient age groups

\_\_\_\_\_

Finding meaning, spiritual concerns

- Yes, degree differs depending on their patient's age group  
 No, degree is the same for all patient age groups

Please write the degree for family members/caregivers of all patient age groups

\_\_\_\_\_

Family relationships (communication problems, conflict management, concerns about children or adolescents)

- Yes, degree differs depending on their patient's age group  
 No, degree is the same for all patient age groups

Please write the degree for family members/caregivers of all patient age groups

\_\_\_\_\_

Sexuality, intimacy

- Yes, degree differs depending on their patient's age group  
 No, degree is the same for all patient age groups

Please write the degree for family members/caregivers of all patient age groups

\_\_\_\_\_

Social relationships/isolation

- Yes, degree differs depending on their patient's age group  
 No, degree is the same for all patient age groups

Please write the degree for family members/caregivers of all patient age groups

\_\_\_\_\_

---

Medical care related to cancer

Yes, degree differs depending on their patient's age group  
 No, degree is the same for all patient age groups

---

Please write the degree for family members/caregivers of all patient age groups

\_\_\_\_\_

---

Cancer-related symptom management

Yes, degree differs depending on their patient's age group  
 No, degree is the same for all patient age groups

---

Please write the degree for family members/caregivers of all patient age groups

\_\_\_\_\_

---

Physical functioning decline

Yes, degree differs depending on their patient's age group  
 No, degree is the same for all patient age groups

---

Please write the degree for family members/caregivers of all patient age groups

\_\_\_\_\_

---

Cognitive functioning decline

Yes, degree differs depending on their patient's age group  
 No, degree is the same for all patient age groups

---

Please write the degree for family members/caregivers of all patient age groups

\_\_\_\_\_

---

Insomnia, sleep difficulty, fatigue

Yes, degree differs depending on their patient's age group  
 No, degree is the same for all patient age groups

---

Please write the degree for family members/caregivers of all patient age groups

\_\_\_\_\_

---

Financial concern stemming from cancer care

Yes, degree differs depending on their patient's age group  
 No, degree is the same for all patient age groups

---

Please write the degree for family members/caregivers of all patient age groups

\_\_\_\_\_

---

Personal care for daily living

Yes, degree differs depending on their patient's age group  
 No, degree is the same for all patient age groups

---

Please write the degree for family members/caregivers of all patient age groups

\_\_\_\_\_

---

Balancing other social roles with a new role as a family caregiver

Yes, degree differs depending on their patient's age group  
 No, degree is the same for all patient age groups

---

Please write the degree for family members/caregivers of all patient age groups

\_\_\_\_\_

---

---

Grief/bereavement

- Yes, degree differs depending on their patient's age group
- No, degree is the same for all patient age groups

---

Please write the degree for family members/caregivers of all patient age groups

\_\_\_\_\_

---

"[q12\_1an1]"

- Yes, degree differs depending on their patient's age group
- No, degree is the same for all patient age groups

---

Please write the degree for family members/caregivers of all patient age groups

\_\_\_\_\_

---

"[q12\_1ao1]"

- Yes, degree differs depending on their patient's age group
- No, degree is the same for all patient age groups

---

Please write the degree for family members/caregivers of all patient age groups

\_\_\_\_\_

---

"[q12\_1ap1]"

- Yes, degree differs depending on their patient's age group
- No, degree is the same for all patient age groups

---

Please write the degree for family members/caregivers of all patient age groups

\_\_\_\_\_

---

"[q12\_1aq1]"

- Yes, degree differs depending on their patient's age group
- No, degree is the same for all patient age groups

---

Please write the degree for family members/caregivers of all patient age groups

\_\_\_\_\_

---

"[q12\_1ar1]"

- Yes, degree differs depending on their patient's age group
- No, degree is the same for all patient age groups

---

Please write the degree for family members/caregivers of all patient age groups

\_\_\_\_\_



**Q14.2. In your work with family members/caregivers of cancer patients and survivors who are in different age groups, please write the degree to which you think each concern of family members/caregivers is addressed properly, or the need is met. For each concern, use a scale from 100 (the concern is completely addressed; the need is fully being met) to 0 (the concern is completely unaddressed; the need is not being met at all).**

Emotional distress of family members/caregivers of patients who are 0 ~ 14 or 15 years old (pediatric)

\_\_\_\_\_ (%)

Emotional distress of family members/caregivers of patients who are 15 or 16 ~ 39 years old (adolescent/young adult)

\_\_\_\_\_ (%)

Emotional distress of family members/caregivers of patients who are 40 ~ 65 years old (middle-aged adult)

\_\_\_\_\_ (%)

Emotional distress of family members/caregivers of patients who are older than 65 years old (older adult)

\_\_\_\_\_ (%)

Finding meaning, spiritual concerns of family members/caregivers of patients who are 0 ~ 14 or 15 years old (pediatric)

\_\_\_\_\_ (%)

Finding meaning, spiritual concerns of family members/caregivers of patients who are 15 or 16 ~ 39 years old (adolescent/young adult)

\_\_\_\_\_ (%)

Finding meaning, spiritual concerns of family members/caregivers of patients who are 40 ~ 65 years old (middle-aged adult)

\_\_\_\_\_ (%)

Finding meaning, spiritual concerns of family members/caregivers of patients who are older than 65 years old (older adult)

\_\_\_\_\_ (%)

Family relationships (communication problems, conflict management, concerns about children or adolescents) of family members/caregivers of patients who are 0 ~ 14 or 15 years old (pediatric)

\_\_\_\_\_ (%)

Family relationships (communication problems, conflict management, concerns about children or adolescents) of family members/caregivers of patients who are 15 or 16 ~ 39 years old (adolescent/young adult)

\_\_\_\_\_ (%)

Family relationships (communication problems, conflict management, concerns about children or adolescents) of family members/caregivers of patients who are 40 ~ 65 years old (middle-aged adult)

\_\_\_\_\_ (%)

---

Family relationships (communication problems, conflict management, concerns about children or adolescents) of family members/caregivers of patients who are older than 65 years old (older adult)

---

(%)

---

Sexuality, intimacy of family members/caregivers of patients who are 0 ~ 14 or 15 years old (pediatric)

---

(%)

---

Sexuality, intimacy of family members/caregivers of patients who are 15 or 16 ~ 39 years old (adolescent/young adult)

---

(%)

---

Sexuality, intimacy of family members/caregivers of patients who are 40 ~ 65 years old (middle-aged adult)

---

(%)

---

Sexuality, intimacy of family members/caregivers of patients who are older than 65 years old (older adult)

---

(%)

---

Social relationships/isolation of family members/caregivers of patients who are 0 ~ 14 or 15 years old (pediatric)

---

(%)

---

Social relationships/isolation of family members/caregivers of patients who are 15 or 16 ~ 39 years old (adolescent/young adult)

---

(%)

---

Social relationships/isolation of family members/caregivers of patients who are 40 ~ 65 years old (middle-aged adult)

---

(%)

---

Social relationships/isolation of family members/caregivers of patients who are older than 65 years old (older adult)

---

(%)

---

Medical care related to cancer of family members/caregivers of patients who are 0 ~ 14 or 15 years old (pediatric)

---

(%)

---

Medical care related to cancer of family members/caregivers of patients who are 15 or 16 ~ 39 years old (adolescent/young adult)

---

(%)

---

Medical care related to cancer of family members/caregivers of patients who are 40 ~ 65 years old (middle-aged adult)

---

(%)

---

Medical care related to cancer of family members/caregivers of patients who are older than 65 years old (older adult)

---

(%)

---

Cancer-related symptom management of family members/caregivers of patients who are 0 ~ 14 or 15 years old (pediatric)

---

(%)

---

Cancer-related symptom management of family members/caregivers of patients who are 15 or 16 ~ 39 years old (adolescent/young adult)

---

(%)

---

Cancer-related symptom management of family members/caregivers of patients who are 40 ~ 65 years old (middle-aged adult)

---

(%)

---

Cancer-related symptom management of family members/caregivers of patients who are older than 65 years old (older adult)

---

(%)

---

Physical functioning decline of family members/caregivers of patients who are 0 ~ 14 or 15 years old (pediatric)

---

(%)

---

Physical functioning decline of family members/caregivers of patients who are 15 or 16 ~ 39 years old (adolescent/young adult)

---

(%)

---

Physical functioning decline of family members/caregivers of patients who are 40 ~ 65 years old (middle-aged adult)

---

(%)

---

Physical functioning decline of family members/caregivers of patients who are older than 65 years old (older adult)

---

(%)

---

Cognitive functioning decline of family members/caregivers of patients who are 0 ~ 14 or 15 years old (pediatric)

---

(%)

---

Cognitive functioning decline of family members/caregivers of patients who are 15 or 16 ~ 39 years old (adolescent/young adult)

---

(%)

---

Cognitive functioning decline of family members/caregivers of patients who are 40 ~ 65 years old (middle-aged adult)

---

(%)

---

Cognitive functioning decline of family members/caregivers of patients who are older than 65 years old (older adult)

---

(%)

---

Insomnia, sleep difficulty, fatigue of family members/caregivers of patients who are 0 ~ 14 or 15 years old (pediatric)

---

(%)

---

Insomnia, sleep difficulty, fatigue of family members/caregivers of patients who are 15 or 16 ~ 39 years old (adolescent/young adult)

---

(%)

---

Insomnia, sleep difficulty, fatigue of family members/caregivers of patients who are 40 ~ 65 years old (middle-aged adult)

---

(%)

---

---

Insomnia, sleep difficulty, fatigue of family members/caregivers of patients who are older than 65 years old (older adult)

---

(%)

---

Financial concern stemming from cancer care of family members/caregivers of patients who are 0 ~ 14 or 15 years old (pediatric)

---

(%)

---

Financial concern stemming from cancer care of family members/caregivers of patients who are 15 or 16 ~ 39 years old (adolescent/young adult)

---

(%)

---

Financial concern stemming from cancer care of family members/caregivers of patients who are 40 ~ 65 years old (middle-aged adult)

---

(%)

---

Financial concern stemming from cancer care of family members/caregivers of patients who are older than 65 years old (older adult)

---

(%)

---

Personal care for daily living of family members/caregivers of patients who are 0 ~ 14 or 15 years old (pediatric)

---

(%)

---

Personal care for daily living of family members/caregivers of patients who are 15 or 16 ~ 39 years old (adolescent/young adult)

---

(%)

---

Personal care for daily living of family members/caregivers of patients who are 40 ~ 65 years old (middle-aged adult)

---

(%)

---

Personal care for daily living of family members/caregivers of patients who are older than 65 years old (older adult)

---

(%)

---

Balancing other social roles with a new role as family members/caregivers of patients who are 0 ~ 14 or 15 years old (pediatric)

---

(%)

---

Balancing other social roles with a new role as family members/caregivers of patients who are 15 or 16 ~ 39 years old (adolescent/young adult)

---

(%)

---

Balancing other social roles with a new role as family members/caregivers of patients who are 40 ~ 65 years old (middle-aged adult)

---

(%)

---

Balancing other social roles with a new role as family members/caregivers of patients who are older than 65 years old (older adult)

---

(%)

---

Grief/bereavement of family members/caregivers of patients who are 0 ~ 14 or 15 years old (pediatric)

---

(%)

---

---

Grief/bereavement of family members/caregivers of patients who are 15 or 16 ~ 39 years old (adolescent/young adult) \_\_\_\_\_  
(%)

---

Grief/bereavement of family members/caregivers of patients who are 40 ~ 65 years old (middle-aged adult) \_\_\_\_\_  
(%)

---

Grief/bereavement of family members/caregivers of patients who are older than 65 years old (older adult) \_\_\_\_\_  
(%)

---

"[q12\_1an1]" of family members/caregivers of patients who are 0 ~ 14 or 15 years old (pediatric) \_\_\_\_\_  
(%)

---

"[q12\_1an1]" of family members/caregivers of patients who are 15 or 16 ~ 39 years old (adolescent/young adult) \_\_\_\_\_  
(%)

---

"[q12\_1an1]" of family members/caregivers of patients who are 40 ~ 65 years old (middle-aged adult) \_\_\_\_\_  
(%)

---

"[q12\_1an1]" of family members/caregivers of patients who are older than 65 years old (older adult) \_\_\_\_\_  
(%)

---

"[q12\_1ao1]" of family members/caregivers of patients who are 0 ~ 14 or 15 years old (pediatric) \_\_\_\_\_  
(%)

---

"[q12\_1ao1]" of family members/caregivers of patients who are 15 or 16 ~ 39 years old (adolescent/young adult) \_\_\_\_\_  
(%)

---

"[q12\_1ao1]" of family members/caregivers of patients who are 40 ~ 65 years old (middle-aged adult) \_\_\_\_\_  
(%)

---

"[q12\_1ao1]" of family members/caregivers of patients who are older than 65 years old (older adult) \_\_\_\_\_  
(%)

---

"[q12\_1ap1]" of family members/caregivers of patients who are 0 ~ 14 or 15 years old (pediatric) \_\_\_\_\_  
(%)

---

"[q12\_1ap1]" of family members/caregivers of patients who are 15 or 16 ~ 39 years old (adolescent/young adult) \_\_\_\_\_  
(%)

---

"[q12\_1ap1]" of family members/caregivers of patients who are 40 ~ 65 years old (middle-aged adult) \_\_\_\_\_  
(%)

---

"[q12\_1ap1]" of family members/caregivers of patients  
who are older than 65 years old (older adult)

---

(%)

---

"[q12\_1aq1]" of family members/caregivers of patients  
who are 0 ~ 14 or 15 years old (pediatric)

---

(%)

---

"[q12\_1aq1]" of family members/caregivers of patients  
who are 15 or 16 ~ 39 years old (adolescent/young  
adult)

---

(%)

---

"[q12\_1aq1]" of family members/caregivers of patients  
who are 40 ~ 65 years old (middle-aged adult)

---

(%)

---

"[q12\_1aq1]" of family members/caregivers of patients  
who are older than 65 years old (older adult)

---

(%)

---

"[q12\_1ar1]" of family members/caregivers of patients  
who are 0 ~ 14 or 15 years old (pediatric)

---

(%)

---

"[q12\_1ar1]" of family members/caregivers of patients  
who are 15 or 16 ~ 39 years old (adolescent/young  
adult)

---

(%)

---

"[q12\_1ar1]" of family members/caregivers of patients  
who are 40 ~ 65 years old (middle-aged adult)

---

(%)

---

"[q12\_1ar1]" of family members/caregivers of patients  
who are older than 65 years old (older adult)

---

(%)

---

**Section 7: Family Members and Family Caregivers - Support Programs**

The next couple of questions are to learn about programs or services designed to address the family members'/family caregivers' concerns that you or your institution are providing.

- Skip
- Continue or Next

If you do wish to skip this section, please select "Skip" and click "Next Page", which will bring you to the next section of the survey.

If you want to continue to the program/service questions, please select "Continue or Next" and click "Next Page," which will bring you to the next question.

**Q15.1. Do you or your institution systematically assess each of the concerns below for family members or family caregivers of cancer patients or survivors? By "systematically assess" we mean that there is a routine process for screening or inquiring about these issues for each family member or family caregiver.**

Emotional distress

- Yes, this concern is systematically assessed for family members/caregivers of all patient age groups
- Yes, but systematic assessment varies depending on their patient's age group
- No, the concern is not systematically assessed
- Do not know

Finding meaning, spiritual concerns

- Yes, this concern is systematically assessed for family members/caregivers of all patient age groups
- Yes, but systematic assessment varies depending on their patient's age group
- No, the concern is not systematically assessed
- Do not know

Family relationships (communication problems, conflict management, concerns about children or adolescents)

- Yes, this concern is systematically assessed for family members/caregivers of all patient age groups
- Yes, but systematic assessment varies depending on their patient's age group
- No, the concern is not systematically assessed
- Do not know

Sexuality, intimacy

- Yes, this concern is systematically assessed for family members/caregivers of all patient age groups
- Yes, but systematic assessment varies depending on their patient's age group
- No, the concern is not systematically assessed
- Do not know

Social relationship/isolation

- Yes, this concern is systematically assessed for family members/caregivers of all patient age groups
- Yes, but systematic assessment varies depending on their patient's age group
- No, the concern is not systematically assessed
- Do not know

Medical care related to cancer

- Yes, this concern is systematically assessed for family members/caregivers of all patient age groups
- Yes, but systematic assessment varies depending on their patient's age group
- No, the concern is not systematically assessed
- Do not know

Cancer-related Symptom management

- Yes, this concern is systematically assessed for family members/caregivers of all patient age groups
- Yes, but systematic assessment varies depending on their patient's age group
- No, the concern is not systematically assessed
- Do not know



---

|                                                                    |                                                                                                                                                                                                                                                                                                                                               |
|--------------------------------------------------------------------|-----------------------------------------------------------------------------------------------------------------------------------------------------------------------------------------------------------------------------------------------------------------------------------------------------------------------------------------------|
| Physical functioning decline                                       | <input type="radio"/> Yes, this concern is systematically assessed for family members/caregivers of all patient age groups<br><input type="radio"/> Yes, but systematic assessment varies depending on their patient's age group<br><input type="radio"/> No, the concern is not systematically assessed<br><input type="radio"/> Do not know |
| Cognitive functioning decline                                      | <input type="radio"/> Yes, this concern is systematically assessed for family members/caregivers of all patient age groups<br><input type="radio"/> Yes, but systematic assessment varies depending on their patient's age group<br><input type="radio"/> No, the concern is not systematically assessed<br><input type="radio"/> Do not know |
| Insomnia, sleep difficulty, fatigue                                | <input type="radio"/> Yes, this concern is systematically assessed for family members/caregivers of all patient age groups<br><input type="radio"/> Yes, but systematic assessment varies depending on their patient's age group<br><input type="radio"/> No, the concern is not systematically assessed<br><input type="radio"/> Do not know |
| Financial concern stemming from cancer care                        | <input type="radio"/> Yes, this concern is systematically assessed for family members/caregivers of all patient age groups<br><input type="radio"/> Yes, but systematic assessment varies depending on their patient's age group<br><input type="radio"/> No, the concern is not systematically assessed<br><input type="radio"/> Do not know |
| Personal care for daily living                                     | <input type="radio"/> Yes, this concern is systematically assessed for family members/caregivers of all patient age groups<br><input type="radio"/> Yes, but systematic assessment varies depending on their patient's age group<br><input type="radio"/> No, the concern is not systematically assessed<br><input type="radio"/> Do not know |
| Balancing other social roles with a new role as a family caregiver | <input type="radio"/> Yes, this concern is systematically assessed for family members/caregivers of all patient age groups<br><input type="radio"/> Yes, but systematic assessment varies depending on their patient's age group<br><input type="radio"/> No, the concern is not systematically assessed<br><input type="radio"/> Do not know |
| Grief/bereavement                                                  | <input type="radio"/> Yes, this concern is systematically assessed for family members/caregivers of all patient age groups<br><input type="radio"/> Yes, but systematic assessment varies depending on their patient's age group<br><input type="radio"/> No, the concern is not systematically assessed<br><input type="radio"/> Do not know |
| "[q12_1an1]"                                                       | <input type="radio"/> Yes, this concern is systematically assessed for family members/caregivers of all patient age groups<br><input type="radio"/> Yes, but systematic assessment varies depending on their patient's age group<br><input type="radio"/> No, the concern is not systematically assessed<br><input type="radio"/> Do not know |

---

---

"[q12\_1ao1]"

- Yes, this concern is systematically assessed for family members/caregivers of all patient age groups
- Yes, but systematic assessment varies depending on their patient's age group
- No, the concern is not systematically assessed
- Do not know

---

"[q12\_1ap1]"

- Yes, this concern is systematically assessed for family members/caregivers of all patient age groups
- Yes, but systematic assessment varies depending on their patient's age group
- No, the concern is not systematically assessed
- Do not know

---

"[q12\_1aq1]"

- Yes, this concern is systematically assessed for family members/caregivers of all patient age groups
- Yes, but systematic assessment varies depending on their patient's age group
- No, the concern is not systematically assessed
- Do not know

---

"[q12\_1ar1]"

- Yes, this concern is systematically assessed for family members/caregivers of all patient age groups
- Yes, but systematic assessment varies depending on their patient's age group
- No, the concern is not systematically assessed
- Do not know

**Q15.2. Now please check (✓) the box for the age group(s) for which you or your institution systematically assesses family members'/caregivers' concerns the concerns below.**

Emotional distress

- family members/caregivers of 0 ~ 14 or 15 years old patient (pediatric)
- family members/caregivers of 15 or 16 ~ 39 years old patient (adolescent/young adult)
- family members/caregivers of 40 ~ 65 years old patient (middle-aged adult)
- family members/caregivers of older than 65 years old patient (older adult)

Finding meaning, spiritual concerns

- family members/caregivers of 0 ~ 14 or 15 years old patient (pediatric)
- family members/caregivers of 15 or 16 ~ 39 years old patient (adolescent/young adult)
- family members/caregivers of 40 ~ 65 years old patient (middle-aged adult)
- family members/caregivers of older than 65 years old patient (older adult)

Family relationships (communication problems, conflict management, concerns about children or adolescents)

- family members/caregivers of 0 ~ 14 or 15 years old patient (pediatric)
- family members/caregivers of 15 or 16 ~ 39 years old patient (adolescent/young adult)
- family members/caregivers of 40 ~ 65 years old patient (middle-aged adult)
- family members/caregivers of older than 65 years old patient (older adult)

Sexuality, intimacy

- family members/caregivers of 0 ~ 14 or 15 years old patient (pediatric)
- family members/caregivers of 15 or 16 ~ 39 years old patient (adolescent/young adult)
- family members/caregivers of 40 ~ 65 years old patient (middle-aged adult)
- family members/caregivers of older than 65 years old patient (older adult)

Social relationships/isolation

- family members/caregivers of 0 ~ 14 or 15 years old patient (pediatric)
- family members/caregivers of 15 or 16 ~ 39 years old patient (adolescent/young adult)
- family members/caregivers of 40 ~ 65 years old patient (middle-aged adult)
- family members/caregivers of older than 65 years old patient (older adult)

Medical care related to cancer

- family members/caregivers of 0 ~ 14 or 15 years old patient (pediatric)
- family members/caregivers of 15 or 16 ~ 39 years old patient (adolescent/young adult)
- family members/caregivers of 40 ~ 65 years old patient (middle-aged adult)
- family members/caregivers of older than 65 years old patient (older adult)

---

|                                             |                                                                                                                                                                                                                                                                                                                                                                                                                                  |
|---------------------------------------------|----------------------------------------------------------------------------------------------------------------------------------------------------------------------------------------------------------------------------------------------------------------------------------------------------------------------------------------------------------------------------------------------------------------------------------|
| Cancer-related symptom management           | <input type="checkbox"/> family members/caregivers of 0 ~ 14 or 15 years old patient (pediatric)<br><input type="checkbox"/> family members/caregivers of 15 or 16 ~ 39 years old patient (adolescent/young adult)<br><input type="checkbox"/> family members/caregivers of 40 ~ 65 years old patient (middle-aged adult)<br><input type="checkbox"/> family members/caregivers of older than 65 years old patient (older adult) |
| Physical functioning decline                | <input type="checkbox"/> family members/caregivers of 0 ~ 14 or 15 years old patient (pediatric)<br><input type="checkbox"/> family members/caregivers of 15 or 16 ~ 39 years old patient (adolescent/young adult)<br><input type="checkbox"/> family members/caregivers of 40 ~ 65 years old patient (middle-aged adult)<br><input type="checkbox"/> family members/caregivers of older than 65 years old patient (older adult) |
| Cognitive functioning decline               | <input type="checkbox"/> family members/caregivers of 0 ~ 14 or 15 years old patient (pediatric)<br><input type="checkbox"/> family members/caregivers of 15 or 16 ~ 39 years old patient (adolescent/young adult)<br><input type="checkbox"/> family members/caregivers of 40 ~ 65 years old patient (middle-aged adult)<br><input type="checkbox"/> family members/caregivers of older than 65 years old patient (older adult) |
| Insomnia, sleep difficulty, fatigue         | <input type="checkbox"/> family members/caregivers of 0 ~ 14 or 15 years old patient (pediatric)<br><input type="checkbox"/> family members/caregivers of 15 or 16 ~ 39 years old patient (adolescent/young adult)<br><input type="checkbox"/> family members/caregivers of 40 ~ 65 years old patient (middle-aged adult)<br><input type="checkbox"/> family members/caregivers of older than 65 years old patient (older adult) |
| Financial concern stemming from cancer care | <input type="checkbox"/> family members/caregivers of 0 ~ 14 or 15 years old patient (pediatric)<br><input type="checkbox"/> family members/caregivers of 15 or 16 ~ 39 years old patient (adolescent/young adult)<br><input type="checkbox"/> family members/caregivers of 40 ~ 65 years old patient (middle-aged adult)<br><input type="checkbox"/> family members/caregivers of older than 65 years old patient (older adult) |
| Personal care for daily living              | <input type="checkbox"/> family members/caregivers of 0 ~ 14 or 15 years old patient (pediatric)<br><input type="checkbox"/> family members/caregivers of 15 or 16 ~ 39 years old patient (adolescent/young adult)<br><input type="checkbox"/> family members/caregivers of 40 ~ 65 years old patient (middle-aged adult)<br><input type="checkbox"/> family members/caregivers of older than 65 years old patient (older adult) |

---

---

Balancing other social roles with a new role as a family caregiver

- family members/caregivers of 0 ~ 14 or 15 years old patient (pediatric)
- family members/caregivers of 15 or 16 ~ 39 years old patient (adolescent/young adult)
- family members/caregivers of 40 ~ 65 years old patient (middle-aged adult)
- family members/caregivers of older than 65 years old patient (older adult)

---

Grief/bereavement

- family members/caregivers of 0 ~ 14 or 15 years old patient (pediatric)
- family members/caregivers of 15 or 16 ~ 39 years old patient (adolescent/young adult)
- family members/caregivers of 40 ~ 65 years old patient (middle-aged adult)
- family members/caregivers of older than 65 years old patient (older adult)

---

"[q12\_1an1]"

- family members/caregivers of 0 ~ 14 or 15 years old patient (pediatric)
- family members/caregivers of 15 or 16 ~ 39 years old patient (adolescent/young adult)
- family members/caregivers of 40 ~ 65 years old patient (middle-aged adult)
- family members/caregivers of older than 65 years old patient (older adult)

---

"[q12\_1ao1]"

- family members/caregivers of 0 ~ 14 or 15 years old patient (pediatric)
- family members/caregivers of 15 or 16 ~ 39 years old patient (adolescent/young adult)
- family members/caregivers of 40 ~ 65 years old patient (middle-aged adult)
- family members/caregivers of older than 65 years old patient (older adult)

---

"[q12\_1ap1]"

- family members/caregivers of 0 ~ 14 or 15 years old patient (pediatric)
- family members/caregivers of 15 or 16 ~ 39 years old patient (adolescent/young adult)
- family members/caregivers of 40 ~ 65 years old patient (middle-aged adult)
- family members/caregivers of older than 65 years old patient (older adult)

---

"[q12\_1aq1]"

- family members/caregivers of 0 ~ 14 or 15 years old patient (pediatric)
- family members/caregivers of 15 or 16 ~ 39 years old patient (adolescent/young adult)
- family members/caregivers of 40 ~ 65 years old patient (middle-aged adult)
- family members/caregivers of older than 65 years old patient (older adult)

---

"[q12\_1ar1]"

- family members/caregivers of 0 ~ 14 or 15 years old patient (pediatric)
- family members/caregivers of 15 or 16 ~ 39 years old patient (adolescent/young adult)
- family members/caregivers of 40 ~ 65 years old patient (middle-aged adult)
- family members/caregivers of older than 65 years old patient (older adult)

**Q16.1. Do you or your institution provide any services to address each of the concerns below for family members/caregivers of cancer patients/survivors?**

- 
- |                                                                                                            |                                                                                                                                                                                                                                                                                                                                 |
|------------------------------------------------------------------------------------------------------------|---------------------------------------------------------------------------------------------------------------------------------------------------------------------------------------------------------------------------------------------------------------------------------------------------------------------------------|
| Emotional distress                                                                                         | <input type="radio"/> Yes, service for this concern is provided for family members/caregivers of all patient age groups<br><input type="radio"/> Yes, but service provision varies depending on their patient's age group<br><input type="radio"/> No, service for concern is not provided<br><input type="radio"/> Do not know |
| <hr/>                                                                                                      |                                                                                                                                                                                                                                                                                                                                 |
| Finding meaning, spiritual concerns                                                                        | <input type="radio"/> Yes, service for this concern is provided for family members/caregivers of all patient age groups<br><input type="radio"/> Yes, but service provision varies depending on their patient's age group<br><input type="radio"/> No, service for concern is not provided<br><input type="radio"/> Do not know |
| <hr/>                                                                                                      |                                                                                                                                                                                                                                                                                                                                 |
| Family relationships (communication problems, conflict management, concerns about children or adolescents) | <input type="radio"/> Yes, service for this concern is provided for family members/caregivers of all patient age groups<br><input type="radio"/> Yes, but service provision varies depending on their patient's age group<br><input type="radio"/> No, service for concern is not provided<br><input type="radio"/> Do not know |
| <hr/>                                                                                                      |                                                                                                                                                                                                                                                                                                                                 |
| Sexuality, intimacy                                                                                        | <input type="radio"/> Yes, service for this concern is provided for family members/caregivers of all patient age groups<br><input type="radio"/> Yes, but service provision varies depending on their patient's age group<br><input type="radio"/> No, service for concern is not provided<br><input type="radio"/> Do not know |
| <hr/>                                                                                                      |                                                                                                                                                                                                                                                                                                                                 |
| Social relationship/isolation                                                                              | <input type="radio"/> Yes, service for this concern is provided for family members/caregivers of all patient age groups<br><input type="radio"/> Yes, but service provision varies depending on their patient's age group<br><input type="radio"/> No, service for concern is not provided<br><input type="radio"/> Do not know |
| <hr/>                                                                                                      |                                                                                                                                                                                                                                                                                                                                 |
| Medical care related to cancer                                                                             | <input type="radio"/> Yes, service for this concern is provided for family members/caregivers of all patient age groups<br><input type="radio"/> Yes, but service provision varies depending on their patient's age group<br><input type="radio"/> No, service for concern is not provided<br><input type="radio"/> Do not know |
| <hr/>                                                                                                      |                                                                                                                                                                                                                                                                                                                                 |
| Cancer-related Symptom management                                                                          | <input type="radio"/> Yes, service for this concern is provided for family members/caregivers of all patient age groups<br><input type="radio"/> Yes, but service provision varies depending on their patient's age group<br><input type="radio"/> No, service for concern is not provided<br><input type="radio"/> Do not know |
| <hr/>                                                                                                      |                                                                                                                                                                                                                                                                                                                                 |
| Physical functioning decline                                                                               | <input type="radio"/> Yes, service for this concern is provided for family members/caregivers of all patient age groups<br><input type="radio"/> Yes, but service provision varies depending on their patient's age group<br><input type="radio"/> No, service for concern is not provided<br><input type="radio"/> Do not know |

---

|                                                                    |                                                                                                                                                                                                                                                                                                                                 |
|--------------------------------------------------------------------|---------------------------------------------------------------------------------------------------------------------------------------------------------------------------------------------------------------------------------------------------------------------------------------------------------------------------------|
| Cognitive functioning decline                                      | <input type="radio"/> Yes, service for this concern is provided for family members/caregivers of all patient age groups<br><input type="radio"/> Yes, but service provision varies depending on their patient's age group<br><input type="radio"/> No, service for concern is not provided<br><input type="radio"/> Do not know |
| Insomnia, sleep difficulty, fatigue                                | <input type="radio"/> Yes, service for this concern is provided for family members/caregivers of all patient age groups<br><input type="radio"/> Yes, but service provision varies depending on their patient's age group<br><input type="radio"/> No, service for concern is not provided<br><input type="radio"/> Do not know |
| Financial concern stemming from cancer care                        | <input type="radio"/> Yes, service for this concern is provided for family members/caregivers of all patient age groups<br><input type="radio"/> Yes, but service provision varies depending on their patient's age group<br><input type="radio"/> No, service for concern is not provided<br><input type="radio"/> Do not know |
| Personal care for daily living                                     | <input type="radio"/> Yes, service for this concern is provided for family members/caregivers of all patient age groups<br><input type="radio"/> Yes, but service provision varies depending on their patient's age group<br><input type="radio"/> No, service for concern is not provided<br><input type="radio"/> Do not know |
| Balancing other social roles with a new role as a family caregiver | <input type="radio"/> Yes, service for this concern is provided for family members/caregivers of all patient age groups<br><input type="radio"/> Yes, but service provision varies depending on their patient's age group<br><input type="radio"/> No, service for concern is not provided<br><input type="radio"/> Do not know |
| Grief/bereavement                                                  | <input type="radio"/> Yes, service for this concern is provided for family members/caregivers of all patient age groups<br><input type="radio"/> Yes, but service provision varies depending on their patient's age group<br><input type="radio"/> No, service for concern is not provided<br><input type="radio"/> Do not know |
| "[q12_1an1]"                                                       | <input type="radio"/> Yes, service for this concern is provided for family members/caregivers of all patient age groups<br><input type="radio"/> Yes, but service provision varies depending on their patient's age group<br><input type="radio"/> No, service for concern is not provided<br><input type="radio"/> Do not know |
| "[q12_1ao1]"                                                       | <input type="radio"/> Yes, service for this concern is provided for family members/caregivers of all patient age groups<br><input type="radio"/> Yes, but service provision varies depending on their patient's age group<br><input type="radio"/> No, service for concern is not provided<br><input type="radio"/> Do not know |

---



---

"[q12\_1ap1]"

- Yes, service for this concern is provided for family members/caregivers of all patient age groups
- Yes, but service provision varies depending on their patient's age group
- No, service for concern is not provided
- Do not know

---

"[q12\_1aq1]"

- Yes, service for this concern is provided for family members/caregivers of all patient age groups
- Yes, but service provision varies depending on their patient's age group
- No, service for concern is not provided
- Do not know

---

"[q12\_1ar1]"

- Yes, service for this concern is provided for family members/caregivers of all patient age groups
- Yes, but service provision varies depending on their patient's age group
- No, service for concern is not provided
- Do not know

**Q16.2. Now please check (✓) the box for the age group(s) for which you or your institution provides any services to address each of the concerns below.**

Emotional distress

- family members/caregivers of 0 ~ 14 or 15 years old patient (pediatric)
- family members/caregivers of 15 or 16 ~ 39 years old patient (adolescent/young adult)
- family members/caregivers of 40 ~ 65 years old patient (middle-aged adult)
- family members/caregivers of older than 65 years old patient (older adult)

Finding meaning, spiritual concerns

- family members/caregivers of 0 ~ 14 or 15 years old patient (pediatric)
- family members/caregivers of 15 or 16 ~ 39 years old patient (adolescent/young adult)
- family members/caregivers of 40 ~ 65 years old patient (middle-aged adult)
- family members/caregivers of older than 65 years old patient (older adult)

Family relationships (communication problems, conflict management, concerns about children or adolescents)

- family members/caregivers of 0 ~ 14 or 15 years old patient (pediatric)
- family members/caregivers of 15 or 16 ~ 39 years old patient (adolescent/young adult)
- family members/caregivers of 40 ~ 65 years old patient (middle-aged adult)
- family members/caregivers of older than 65 years old patient (older adult)

Sexuality, intimacy

- family members/caregivers of 0 ~ 14 or 15 years old patient (pediatric)
- family members/caregivers of 15 or 16 ~ 39 years old patient (adolescent/young adult)
- family members/caregivers of 40 ~ 65 years old patient (middle-aged adult)
- family members/caregivers of older than 65 years old patient (older adult)

Social relationships/isolation

- family members/caregivers of 0 ~ 14 or 15 years old patient (pediatric)
- family members/caregivers of 15 or 16 ~ 39 years old patient (adolescent/young adult)
- family members/caregivers of 40 ~ 65 years old patient (middle-aged adult)
- family members/caregivers of older than 65 years old patient (older adult)

Medical care related to cancer

- family members/caregivers of 0 ~ 14 or 15 years old patient (pediatric)
- family members/caregivers of 15 or 16 ~ 39 years old patient (adolescent/young adult)
- family members/caregivers of 40 ~ 65 years old patient (middle-aged adult)
- family members/caregivers of older than 65 years old patient (older adult)

---

|                                             |                                                                                                                                                                                                                                                                                                                                                                                                                                  |
|---------------------------------------------|----------------------------------------------------------------------------------------------------------------------------------------------------------------------------------------------------------------------------------------------------------------------------------------------------------------------------------------------------------------------------------------------------------------------------------|
| Cancer-related symptom management           | <input type="checkbox"/> family members/caregivers of 0 ~ 14 or 15 years old patient (pediatric)<br><input type="checkbox"/> family members/caregivers of 15 or 16 ~ 39 years old patient (adolescent/young adult)<br><input type="checkbox"/> family members/caregivers of 40 ~ 65 years old patient (middle-aged adult)<br><input type="checkbox"/> family members/caregivers of older than 65 years old patient (older adult) |
| Physical functioning decline                | <input type="checkbox"/> family members/caregivers of 0 ~ 14 or 15 years old patient (pediatric)<br><input type="checkbox"/> family members/caregivers of 15 or 16 ~ 39 years old patient (adolescent/young adult)<br><input type="checkbox"/> family members/caregivers of 40 ~ 65 years old patient (middle-aged adult)<br><input type="checkbox"/> family members/caregivers of older than 65 years old patient (older adult) |
| Cognitive functioning decline               | <input type="checkbox"/> family members/caregivers of 0 ~ 14 or 15 years old patient (pediatric)<br><input type="checkbox"/> family members/caregivers of 15 or 16 ~ 39 years old patient (adolescent/young adult)<br><input type="checkbox"/> family members/caregivers of 40 ~ 65 years old patient (middle-aged adult)<br><input type="checkbox"/> family members/caregivers of older than 65 years old patient (older adult) |
| Insomnia, sleep difficulty, fatigue         | <input type="checkbox"/> family members/caregivers of 0 ~ 14 or 15 years old patient (pediatric)<br><input type="checkbox"/> family members/caregivers of 15 or 16 ~ 39 years old patient (adolescent/young adult)<br><input type="checkbox"/> family members/caregivers of 40 ~ 65 years old patient (middle-aged adult)<br><input type="checkbox"/> family members/caregivers of older than 65 years old patient (older adult) |
| Financial concern stemming from cancer care | <input type="checkbox"/> family members/caregivers of 0 ~ 14 or 15 years old patient (pediatric)<br><input type="checkbox"/> family members/caregivers of 15 or 16 ~ 39 years old patient (adolescent/young adult)<br><input type="checkbox"/> family members/caregivers of 40 ~ 65 years old patient (middle-aged adult)<br><input type="checkbox"/> family members/caregivers of older than 65 years old patient (older adult) |
| Personal care for daily living              | <input type="checkbox"/> family members/caregivers of 0 ~ 14 or 15 years old patient (pediatric)<br><input type="checkbox"/> family members/caregivers of 15 or 16 ~ 39 years old patient (adolescent/young adult)<br><input type="checkbox"/> family members/caregivers of 40 ~ 65 years old patient (middle-aged adult)<br><input type="checkbox"/> family members/caregivers of older than 65 years old patient (older adult) |

---

Balancing other social roles with a new role as a family caregiver

- family members/caregivers of 0 ~ 14 or 15 years old patient (pediatric)
- family members/caregivers of 15 or 16 ~ 39 years old patient (adolescent/young adult)
- family members/caregivers of 40 ~ 65 years old patient (middle-aged adult)
- family members/caregivers of older than 65 years old patient (older adult)

Grief/bereavement

- family members/caregivers of 0 ~ 14 or 15 years old patient (pediatric)
- family members/caregivers of 15 or 16 ~ 39 years old patient (adolescent/young adult)
- family members/caregivers of 40 ~ 65 years old patient (middle-aged adult)
- family members/caregivers of older than 65 years old patient (older adult)

"[q12\_1an1]"

- family members/caregivers of 0 ~ 14 or 15 years old patient (pediatric)
- family members/caregivers of 15 or 16 ~ 39 years old patient (adolescent/young adult)
- family members/caregivers of 40 ~ 65 years old patient (middle-aged adult)
- family members/caregivers of older than 65 years old patient (older adult)

"[q12\_1ao1]"

- family members/caregivers of 0 ~ 14 or 15 years old patient (pediatric)
- family members/caregivers of 15 or 16 ~ 39 years old patient (adolescent/young adult)
- family members/caregivers of 40 ~ 65 years old patient (middle-aged adult)
- family members/caregivers of older than 65 years old patient (older adult)

"[q12\_1ap1]"

- family members/caregivers of 0 ~ 14 or 15 years old patient (pediatric)
- family members/caregivers of 15 or 16 ~ 39 years old patient (adolescent/young adult)
- family members/caregivers of 40 ~ 65 years old patient (middle-aged adult)
- family members/caregivers of older than 65 years old patient (older adult)

"[q12\_1aq1]"

- family members/caregivers of 0 ~ 14 or 15 years old patient (pediatric)
- family members/caregivers of 15 or 16 ~ 39 years old patient (adolescent/young adult)
- family members/caregivers of 40 ~ 65 years old patient (middle-aged adult)
- family members/caregivers of older than 65 years old patient (older adult)

---

"[q12\_1ar1]"

- family members/caregivers of 0 ~ 14 or 15 years old patient (pediatric)
- family members/caregivers of 15 or 16 ~ 39 years old patient (adolescent/young adult)
- family members/caregivers of 40 ~ 65 years old patient (middle-aged adult)
- family members/caregivers of older than 65 years old patient (older adult)

**Q17.1. What kinds of services do you or your institution provide to help family members/caregivers of cancer patients or survivors manage the following concerns?**

**Please first check (✓) all boxes that apply if you or your institution does provide the service listed below to address the concern for family members/caregivers.**

**Then, answer whether that same service to address the family member's/caregiver's concern is provided for all age groups, or if the service provision varies depending on their patient's age group.**

Emotional distress

- Psychotherapy or Psychological Counseling  
 Support Group or Forums  
 Booklets or Audio/Video Self-Help Materials  
 Pharmacologic  
 Other

Is Psychotherapy or Psychological Counseling provided for family members/caregivers of patients in all age groups?

- Yes, it is provided for family members/caregivers of patients in all age groups  
 No, it varies depending on their patient's age group

Is Support Group or Forums provided for family members/caregivers of patients in all age groups?

- Yes, it is provided for family members/caregivers of patients in all age groups  
 No, it varies depending on their patient's age group

Is Booklets or Audio/Video Self-Help Materials provided for family members/caregivers of patients in all age groups?

- Yes, it is provided for family members/caregivers of patients in all age groups  
 No, it varies depending on their patient's age group

Is Pharmacologic service provided for family members/caregivers of patients in all age groups?

- Yes, it is provided for family members/caregivers of patients in all age groups  
 No, it varies depending on their patient's age group

Is Other provided for family members/caregivers of patients in all age groups?

- Yes, it is provided for family members/caregivers of patients in all age groups  
 No, it varies depending on their patient's age group

Please specify what "Other" is

\_\_\_\_\_

Finding meaning, spiritual concerns

- Psychotherapy or Psychological Counseling  
 Support Group or Forums  
 Booklets or Audio/Video Self-Help Materials  
 Pharmacologic  
 Other

Is Psychotherapy or Psychological Counseling provided for family members/caregivers of patients in all age groups?

- Yes, it is provided for family members/caregivers of patients in all age groups  
 No, it varies depending on their patient's age group

---

Is Support Group or Forums provided for family members/caregivers of patients in all age groups?

- Yes, it is provided for family members/caregivers of patients in all age groups
- No, it varies depending on their patient's age group

---

Is Booklets or Audio/Video Self-Help Materials provided for family members/caregivers of patients in all age groups?

- Yes, it is provided for family members/caregivers of patients in all age groups
- No, it varies depending on their patient's age group

---

Is Pharmacologic service provided for family members/caregivers of patients in all age groups?

- Yes, it is provided for family members/caregivers of patients in all age groups
- No, it varies depending on their patient's age group

---

Is Other provided for family members/caregivers of patients in all age groups?

- Yes, it is provided for family members/caregivers of patients in all age groups
- No, it varies depending on their patient's age group

---

Please specify what "Other" is

---



---

Family relationships (communication problems, conflict management, concerns about children or adolescents)

- Psychotherapy or Psychological Counseling
- Support Group or Forums
- Booklets or Audio/Video Self-Help Materials
- Pharmacologic
- Other

---

Is Psychotherapy or Psychological Counseling provided for family members/caregivers of patients in all age groups?

- Yes, it is provided for family members/caregivers of patients in all age groups
- No, it varies depending on their patient's age group

---

Is Support Group or Forums provided for family members/caregivers of patients in all age groups?

- Yes, it is provided for family members/caregivers of patients in all age groups
- No, it varies depending on their patient's age group

---

Is Booklets or Audio/Video Self-Help Materials provided for family members/caregivers of patients in all age groups?

- Yes, it is provided for family members/caregivers of patients in all age groups
- No, it varies depending on their patient's age group

---

Is Pharmacologic service provided for family members/caregivers of patients in all age groups?

- Yes, it is provided for family members/caregivers of patients in all age groups
- No, it varies depending on their patient's age group

---

Is Other provided for family members/caregivers of patients in all age groups?

- Yes, it is provided for family members/caregivers of patients in all age groups
- No, it varies depending on their patient's age group

---

Please specify what "Other" is

---

|                                                                                                                      |                                                                                                                                                                                                                                                                            |
|----------------------------------------------------------------------------------------------------------------------|----------------------------------------------------------------------------------------------------------------------------------------------------------------------------------------------------------------------------------------------------------------------------|
| Sexuality, intimacy                                                                                                  | <input type="checkbox"/> Psychotherapy or Psychological Counseling<br><input type="checkbox"/> Support Group or Forums<br><input type="checkbox"/> Booklets or Audio/Video Self-Help Materials<br><input type="checkbox"/> Pharmacologic<br><input type="checkbox"/> Other |
| Is Psychotherapy or Psychological Counseling provided for family members/caregivers of patients in all age groups?   | <input type="radio"/> Yes, it is provided for family members/caregivers of patients in all age groups<br><input type="radio"/> No, it varies depending on their patient's age group                                                                                        |
| Is Support Group or Forums provided for family members/caregivers of patients in all age groups?                     | <input type="radio"/> Yes, it is provided for family members/caregivers of patients in all age groups<br><input type="radio"/> No, it varies depending on their patient's age group                                                                                        |
| Is Booklets or Audio/Video Self-Help Materials provided for family members/caregivers of patients in all age groups? | <input type="radio"/> Yes, it is provided for family members/caregivers of patients in all age groups<br><input type="radio"/> No, it varies depending on their patient's age group                                                                                        |
| Is Pharmacologic service provided for family members/caregivers of patients in all age groups?                       | <input type="radio"/> Yes, it is provided for family members/caregivers of patients in all age groups<br><input type="radio"/> No, it varies depending on their patient's age group                                                                                        |
| Is Other provided for family members/caregivers of patients in all age groups?                                       | <input type="radio"/> Yes, it is provided for family members/caregivers of patients in all age groups<br><input type="radio"/> No, it varies depending on their patient's age group                                                                                        |
| Please specify what "Other" is                                                                                       | _____                                                                                                                                                                                                                                                                      |
| Social relationships/isolation                                                                                       | <input type="checkbox"/> Psychotherapy or Psychological Counseling<br><input type="checkbox"/> Support Group or Forums<br><input type="checkbox"/> Booklets or Audio/Video Self-Help Materials<br><input type="checkbox"/> Pharmacologic<br><input type="checkbox"/> Other |
| Is Psychotherapy or Psychological Counseling provided for family members/caregivers of patients in all age groups?   | <input type="radio"/> Yes, it is provided for family members/caregivers of patients in all age groups<br><input type="radio"/> No, it varies depending on their patient's age group                                                                                        |
| Is Support Group or Forums provided for family members/caregivers of patients in all age groups?                     | <input type="radio"/> Yes, it is provided for family members/caregivers of patients in all age groups<br><input type="radio"/> No, it varies depending on their patient's age group                                                                                        |
| Is Booklets or Audio/Video Self-Help Materials provided for family members/caregivers of patients in all age groups? | <input type="radio"/> Yes, it is provided for family members/caregivers of patients in all age groups<br><input type="radio"/> No, it varies depending on their patient's age group                                                                                        |



---

Is Pharmacologic service provided for family members/caregivers of patients in all age groups?

- Yes, it is provided for family members/caregivers of patients in all age groups
- No, it varies depending on their patient's age group

---

Is Other provided for family members/caregivers of patients in all age groups?

- Yes, it is provided for family members/caregivers of patients in all age groups
- No, it varies depending on their patient's age group

---

Please specify what "Other" is

---



---

Medical care related to cancer

- Psychotherapy or Psychological Counseling
- Support Group or Forums
- Booklets or Audio/Video Self-Help Materials
- Pharmacologic
- Other

---

Is Psychotherapy or Psychological Counseling provided for family members/caregivers of patients in all age groups?

- Yes, it is provided for family members/caregivers of patients in all age groups
- No, it varies depending on their patient's age group

---

Is Support Group or Forums provided for family members/caregivers of patients in all age groups?

- Yes, it is provided for family members/caregivers of patients in all age groups
- No, it varies depending on their patient's age group

---

Is Booklets or Audio/Video Self-Help Materials provided for family members/caregivers of patients in all age groups?

- Yes, it is provided for family members/caregivers of patients in all age groups
- No, it varies depending on their patient's age group

---

Is Pharmacologic service provided for family members/caregivers of patients in all age groups?

- Yes, it is provided for family members/caregivers of patients in all age groups
- No, it varies depending on their patient's age group

---

Is Other provided for family members/caregivers of patients in all age groups?

- Yes, it is provided for family members/caregivers of patients in all age groups
- No, it varies depending on their patient's age group

---

Please specify what "Other" is

---



---

Cancer-related symptom management

- Psychotherapy or Psychological Counseling
- Support Group or Forums
- Booklets or Audio/Video Self-Help Materials
- Pharmacologic
- Other

---

Is Psychotherapy or Psychological Counseling provided for family members/caregivers of patients in all age groups?

- Yes, it is provided for family members/caregivers of patients in all age groups
- No, it varies depending on their patient's age group

---

Is Support Group or Forums provided for family members/caregivers of patients in all age groups?

- Yes, it is provided for family members/caregivers of patients in all age groups
- No, it varies depending on their patient's age group

---

Is Booklets or Audio/Video Self-Help Materials provided for family members/caregivers of patients in all age groups?

- Yes, it is provided for family members/caregivers of patients in all age groups
- No, it varies depending on their patient's age group

---

Is Pharmacologic service provided for family members/caregivers of patients in all age groups?

- Yes, it is provided for family members/caregivers of patients in all age groups
- No, it varies depending on their patient's age group

---

Is Other provided for family members/caregivers of patients in all age groups?

- Yes, it is provided for family members/caregivers of patients in all age groups
- No, it varies depending on their patient's age group

---

Please specify what "Other" is

---



---

Physical functioning decline

- Psychotherapy or Psychological Counseling
- Support Group or Forums
- Booklets or Audio/Video Self-Help Materials
- Pharmacologic
- Other

---

Is Psychotherapy or Psychological Counseling provided for family members/caregivers of patients in all age groups?

- Yes, it is provided for family members/caregivers of patients in all age groups
- No, it varies depending on their patient's age group

---

Is Support Group or Forums provided for family members/caregivers of patients in all age groups?

- Yes, it is provided for family members/caregivers of patients in all age groups
- No, it varies depending on their patient's age group

---

Is Booklets or Audio/Video Self-Help Materials provided for family members/caregivers of patients in all age groups?

- Yes, it is provided for family members/caregivers of patients in all age groups
- No, it varies depending on their patient's age group

---

Is Pharmacologic service provided for family members/caregivers of patients in all age groups?

- Yes, it is provided for family members/caregivers of patients in all age groups
- No, it varies depending on their patient's age group

---

Is Other provided for family members/caregivers of patients in all age groups?

- Yes, it is provided for family members/caregivers of patients in all age groups
- No, it varies depending on their patient's age group

---

Please specify what "Other" is

---

|                                                                                                                      |                                                                                                                                                                                                                                                                            |
|----------------------------------------------------------------------------------------------------------------------|----------------------------------------------------------------------------------------------------------------------------------------------------------------------------------------------------------------------------------------------------------------------------|
| Cognitive functioning decline                                                                                        | <input type="checkbox"/> Psychotherapy or Psychological Counseling<br><input type="checkbox"/> Support Group or Forums<br><input type="checkbox"/> Booklets or Audio/Video Self-Help Materials<br><input type="checkbox"/> Pharmacologic<br><input type="checkbox"/> Other |
| Is Psychotherapy or Psychological Counseling provided for family members/caregivers of patients in all age groups?   | <input type="radio"/> Yes, it is provided for family members/caregivers of patients in all age groups<br><input type="radio"/> No, it varies depending on their patient's age group                                                                                        |
| Is Support Group or Forums provided for family members/caregivers of patients in all age groups?                     | <input type="radio"/> Yes, it is provided for family members/caregivers of patients in all age groups<br><input type="radio"/> No, it varies depending on their patient's age group                                                                                        |
| Is Booklets or Audio/Video Self-Help Materials provided for family members/caregivers of patients in all age groups? | <input type="radio"/> Yes, it is provided for family members/caregivers of patients in all age groups<br><input type="radio"/> No, it varies depending on their patient's age group                                                                                        |
| Is Pharmacologic service provided for family members/caregivers of patients in all age groups?                       | <input type="radio"/> Yes, it is provided for family members/caregivers of patients in all age groups<br><input type="radio"/> No, it varies depending on their patient's age group                                                                                        |
| Is Other provided for family members/caregivers of patients in all age groups?                                       | <input type="radio"/> Yes, it is provided for family members/caregivers of patients in all age groups<br><input type="radio"/> No, it varies depending on their patient's age group                                                                                        |
| Please specify what "Other" is                                                                                       | _____                                                                                                                                                                                                                                                                      |
| Insomnia, sleep difficulty, fatigue                                                                                  | <input type="checkbox"/> Psychotherapy or Psychological Counseling<br><input type="checkbox"/> Support Group or Forums<br><input type="checkbox"/> Booklets or Audio/Video Self-Help Materials<br><input type="checkbox"/> Pharmacologic<br><input type="checkbox"/> Other |
| Is Psychotherapy or Psychological Counseling provided for family members/caregivers of patients in all age groups?   | <input type="radio"/> Yes, it is provided for family members/caregivers of patients in all age groups<br><input type="radio"/> No, it varies depending on their patient's age group                                                                                        |
| Is Support Group or Forums provided for family members/caregivers of patients in all age groups?                     | <input type="radio"/> Yes, it is provided for family members/caregivers of patients in all age groups<br><input type="radio"/> No, it varies depending on their patient's age group                                                                                        |
| Is Booklets or Audio/Video Self-Help Materials provided for family members/caregivers of patients in all age groups? | <input type="radio"/> Yes, it is provided for family members/caregivers of patients in all age groups<br><input type="radio"/> No, it varies depending on their patient's age group                                                                                        |

---

Is Pharmacologic service provided for family members/caregivers of patients in all age groups?

- Yes, it is provided for family members/caregivers of patients in all age groups
- No, it varies depending on their patient's age group

---

Is Other provided for family members/caregivers of patients in all age groups?

- Yes, it is provided for family members/caregivers of patients in all age groups
- No, it varies depending on their patient's age group

---

Please specify what "Other" is

\_\_\_\_\_

---

Financial concern stemming from cancer care

- Psychotherapy or Psychological Counseling
- Support Group or Forums
- Booklets or Audio/Video Self-Help Materials
- Pharmacologic
- Other

---

Is Psychotherapy or Psychological Counseling provided for family members/caregivers of patients in all age groups?

- Yes, it is provided for family members/caregivers of patients in all age groups
- No, it varies depending on their patient's age group

---

Is Support Group or Forums provided for family members/caregivers of patients in all age groups?

- Yes, it is provided for family members/caregivers of patients in all age groups
- No, it varies depending on their patient's age group

---

Is Booklets or Audio/Video Self-Help Materials provided for family members/caregivers of patients in all age groups?

- Yes, it is provided for family members/caregivers of patients in all age groups
- No, it varies depending on their patient's age group

---

Is Pharmacologic service provided for family members/caregivers of patients in all age groups?

- Yes, it is provided for family members/caregivers of patients in all age groups
- No, it varies depending on their patient's age group

---

Is Other provided for family members/caregivers of patients in all age groups?

- Yes, it is provided for family members/caregivers of patients in all age groups
- No, it varies depending on their patient's age group

---

Please specify what "Other" is

\_\_\_\_\_

---

Personal care for daily living

- Psychotherapy or Psychological Counseling
- Support Group or Forums
- Booklets or Audio/Video Self-Help Materials
- Pharmacologic
- Other

---

Is Psychotherapy or Psychological Counseling provided for family members/caregivers of patients in all age groups?

- Yes, it is provided for family members/caregivers of patients in all age groups
- No, it varies depending on their patient's age group

---

Is Support Group or Forums provided for family members/caregivers of patients in all age groups?

- Yes, it is provided for family members/caregivers of patients in all age groups
- No, it varies depending on their patient's age group

---

Is Booklets or Audio/Video Self-Help Materials provided for family members/caregivers of patients in all age groups?

- Yes, it is provided for family members/caregivers of patients in all age groups
- No, it varies depending on their patient's age group

---

Is Pharmacologic service provided for family members/caregivers of patients in all age groups?

- Yes, it is provided for family members/caregivers of patients in all age groups
- No, it varies depending on their patient's age group

---

Is Other provided for family members/caregivers of patients in all age groups?

- Yes, it is provided for family members/caregivers of patients in all age groups
- No, it varies depending on their patient's age group

---

Please specify what "Other" is

---



---

Balancing other social roles with a new role as a family caregiver

- Psychotherapy or Psychological Counseling
- Support Group or Forums
- Booklets or Audio/Video Self-Help Materials
- Pharmacologic
- Other

---

Is Psychotherapy or Psychological Counseling provided for family members/caregivers of patients in all age groups?

- Yes, it is provided for family members/caregivers of patients in all age groups
- No, it varies depending on their patient's age group

---

Is Support Group or Forums provided for family members/caregivers of patients in all age groups?

- Yes, it is provided for family members/caregivers of patients in all age groups
- No, it varies depending on their patient's age group

---

Is Booklets or Audio/Video Self-Help Materials provided for family members/caregivers of patients in all age groups?

- Yes, it is provided for family members/caregivers of patients in all age groups
- No, it varies depending on their patient's age group

---

Is Pharmacologic service provided for family members/caregivers of patients in all age groups?

- Yes, it is provided for family members/caregivers of patients in all age groups
- No, it varies depending on their patient's age group

---

Is Other provided for family members/caregivers of patients in all age groups?

- Yes, it is provided for family members/caregivers of patients in all age groups
- No, it varies depending on their patient's age group

---

Please specify what "Other" is

---

|                                                                                                                      |                                                                                                                                                                                                                                                                            |
|----------------------------------------------------------------------------------------------------------------------|----------------------------------------------------------------------------------------------------------------------------------------------------------------------------------------------------------------------------------------------------------------------------|
| Grief/bereavement                                                                                                    | <input type="checkbox"/> Psychotherapy or Psychological Counseling<br><input type="checkbox"/> Support Group or Forums<br><input type="checkbox"/> Booklets or Audio/Video Self-Help Materials<br><input type="checkbox"/> Pharmacologic<br><input type="checkbox"/> Other |
| Is Psychotherapy or Psychological Counseling provided for family members/caregivers of patients in all age groups?   | <input type="radio"/> Yes, it is provided for family members/caregivers of patients in all age groups<br><input type="radio"/> No, it varies depending on their patient's age group                                                                                        |
| Is Support Group or Forums provided for family members/caregivers of patients in all age groups?                     | <input type="radio"/> Yes, it is provided for family members/caregivers of patients in all age groups<br><input type="radio"/> No, it varies depending on their patient's age group                                                                                        |
| Is Booklets or Audio/Video Self-Help Materials provided for family members/caregivers of patients in all age groups? | <input type="radio"/> Yes, it is provided for family members/caregivers of patients in all age groups<br><input type="radio"/> No, it varies depending on their patient's age group                                                                                        |
| Is Pharmacologic service provided for family members/caregivers of patients in all age groups?                       | <input type="radio"/> Yes, it is provided for family members/caregivers of patients in all age groups<br><input type="radio"/> No, it varies depending on their patient's age group                                                                                        |
| Is Other provided for family members/caregivers of patients in all age groups?                                       | <input type="radio"/> Yes, it is provided for family members/caregivers of patients in all age groups<br><input type="radio"/> No, it varies depending on their patient's age group                                                                                        |
| Please specify what "Other" is                                                                                       | _____                                                                                                                                                                                                                                                                      |
| "[q12_1an1]"                                                                                                         | <input type="checkbox"/> Psychotherapy or Psychological Counseling<br><input type="checkbox"/> Support Group or Forums<br><input type="checkbox"/> Booklets or Audio/Video Self-Help Materials<br><input type="checkbox"/> Pharmacologic<br><input type="checkbox"/> Other |
| Is Psychotherapy or Psychological Counseling provided for family members/caregivers of patients in all age groups?   | <input type="radio"/> Yes, it is provided for family members/caregivers of patients in all age groups<br><input type="radio"/> No, it varies depending on their patient's age group                                                                                        |
| Is Support Group or Forums provided for family members/caregivers of patients in all age groups?                     | <input type="radio"/> Yes, it is provided for family members/caregivers of patients in all age groups<br><input type="radio"/> No, it varies depending on their patient's age group                                                                                        |
| Is Booklets or Audio/Video Self-Help Materials provided for family members/caregivers of patients in all age groups? | <input type="radio"/> Yes, it is provided for family members/caregivers of patients in all age groups<br><input type="radio"/> No, it varies depending on their patient's age group                                                                                        |

---

Is Pharmacologic service provided for family members/caregivers of patients in all age groups?

- Yes, it is provided for family members/caregivers of patients in all age groups
- No, it varies depending on their patient's age group

---

Is Other provided for family members/caregivers of patients in all age groups?

- Yes, it is provided for family members/caregivers of patients in all age groups
- No, it varies depending on their patient's age group

---

Please specify what "Other" is

---



---

"[q12\_1ao1]"

- Psychotherapy or Psychological Counseling
- Support Group or Forums
- Booklets or Audio/Video Self-Help Materials
- Pharmacologic
- Other

---

Is Psychotherapy or Psychological Counseling provided for family members/caregivers of patients in all age groups?

- Yes, it is provided for family members/caregivers of patients in all age groups
- No, it varies depending on their patient's age group

---

Is Support Group or Forums provided for family members/caregivers of patients in all age groups?

- Yes, it is provided for family members/caregivers of patients in all age groups
- No, it varies depending on their patient's age group

---

Is Booklets or Audio/Video Self-Help Materials provided for family members/caregivers of patients in all age groups?

- Yes, it is provided for family members/caregivers of patients in all age groups
- No, it varies depending on their patient's age group

---

Is Pharmacologic service provided for family members/caregivers of patients in all age groups?

- Yes, it is provided for family members/caregivers of patients in all age groups
- No, it varies depending on their patient's age group

---

Is Other provided for family members/caregivers of patients in all age groups?

- Yes, it is provided for family members/caregivers of patients in all age groups
- No, it varies depending on their patient's age group

---

Please specify what "Other" is

---



---

"[q12\_1ap1]"

- Psychotherapy or Psychological Counseling
- Support Group or Forums
- Booklets or Audio/Video Self-Help Materials
- Pharmacologic
- Other

---

Is Psychotherapy or Psychological Counseling provided for family members/caregivers of patients in all age groups?

- Yes, it is provided for family members/caregivers of patients in all age groups
- No, it varies depending on their patient's age group

---

Is Support Group or Forums provided for family members/caregivers of patients in all age groups?

- Yes, it is provided for family members/caregivers of patients in all age groups
- No, it varies depending on their patient's age group

---

Is Booklets or Audio/Video Self-Help Materials provided for family members/caregivers of patients in all age groups?

- Yes, it is provided for family members/caregivers of patients in all age groups
- No, it varies depending on their patient's age group

---

Is Pharmacologic service provided for family members/caregivers of patients in all age groups?

- Yes, it is provided for family members/caregivers of patients in all age groups
- No, it varies depending on their patient's age group

---

Is Other provided for family members/caregivers of patients in all age groups?

- Yes, it is provided for family members/caregivers of patients in all age groups
- No, it varies depending on their patient's age group

---

Please specify what "Other" is

---



---

"[q12\_1aq1]"

- Psychotherapy or Psychological Counseling
- Support Group or Forums
- Booklets or Audio/Video Self-Help Materials
- Pharmacologic
- Other

---

Is Psychotherapy or Psychological Counseling provided for family members/caregivers of patients in all age groups?

- Yes, it is provided for family members/caregivers of patients in all age groups
- No, it varies depending on their patient's age group

---

Is Support Group or Forums provided for family members/caregivers of patients in all age groups?

- Yes, it is provided for family members/caregivers of patients in all age groups
- No, it varies depending on their patient's age group

---

Is Booklets or Audio/Video Self-Help Materials provided for family members/caregivers of patients in all age groups?

- Yes, it is provided for family members/caregivers of patients in all age groups
- No, it varies depending on their patient's age group

---

Is Pharmacologic service provided for family members/caregivers of patients in all age groups?

- Yes, it is provided for family members/caregivers of patients in all age groups
- No, it varies depending on their patient's age group

---

Is Other provided for family members/caregivers of patients in all age groups?

- Yes, it is provided for family members/caregivers of patients in all age groups
- No, it varies depending on their patient's age group

---

Please specify what "Other" is

---



---

"[q12\_1ar1]"

- Psychotherapy or Psychological Counseling
- Support Group or Forums
- Booklets or Audio/Video Self-Help Materials
- Pharmacologic
- Other

---

Is Psychotherapy or Psychological Counseling provided for family members/caregivers of patients in all age groups?

- Yes, it is provided for family members/caregivers of patients in all age groups
- No, it varies depending on their patient's age group

---

Is Support Group or Forums provided for family members/caregivers of patients in all age groups?

- Yes, it is provided for family members/caregivers of patients in all age groups
- No, it varies depending on their patient's age group

---

Is Booklets or Audio/Video Self-Help Materials provided for family members/caregivers of patients in all age groups?

- Yes, it is provided for family members/caregivers of patients in all age groups
- No, it varies depending on their patient's age group

---

Is Pharmacologic service provided for family members/caregivers of patients in all age groups?

- Yes, it is provided for family members/caregivers of patients in all age groups
- No, it varies depending on their patient's age group

---

Is Other provided for family members/caregivers of patients in all age groups?

- Yes, it is provided for family members/caregivers of patients in all age groups
- No, it varies depending on their patient's age group

---

Please specify what "Other" is

---

**Q17.2. Now please check (✓) the box for the age group(s) for which the kinds of services that you or your institution provides to address the specific concern of family members/caregivers listed below.**

Psychotherapy or Psychological Counseling for managing Emotional Distress of family members/caregivers

- family members/caregivers of 0 ~ 14 or 15 years old patient (pediatric)
- family members/caregivers of 15 or 16 ~ 39 years old (adolescent/young adult)
- family members/caregivers of 40 ~ 65 years old (middle-aged adult)
- family members/caregivers of older than 65 years old (older adult)

Support Group or Forums for managing Emotional Distress of family members/caregivers

- family members/caregivers of 0 ~ 14 or 15 years old patient (pediatric)
- family members/caregivers of 15 or 16 ~ 39 years old (adolescent/young adult)
- family members/caregivers of 40 ~ 65 years old (middle-aged adult)
- family members/caregivers of older than 65 years old (older adult)

Booklets or Audio/Video Self-Help Materials for managing Emotional Distress of family members/caregivers

- family members/caregivers of 0 ~ 14 or 15 years old patient (pediatric)
- family members/caregivers of 15 or 16 ~ 39 years old (adolescent/young adult)
- family members/caregivers of 40 ~ 65 years old (middle-aged adult)
- family members/caregivers of older than 65 years old (older adult)

Pharmacologic service for managing Emotional Distress of family members/caregivers

- family members/caregivers of 0 ~ 14 or 15 years old patient (pediatric)
- family members/caregivers of 15 or 16 ~ 39 years old (adolescent/young adult)
- family members/caregivers of 40 ~ 65 years old (middle-aged adult)
- family members/caregivers of older than 65 years old (older adult)

"[q17\_1a5o]" for managing Emotional Distress of family members/caregivers

- family members/caregivers of 0 ~ 14 or 15 years old patient (pediatric)
- family members/caregivers of 15 or 16 ~ 39 years old (adolescent/young adult)
- family members/caregivers of 40 ~ 65 years old (middle-aged adult)
- family members/caregivers of older than 65 years old (older adult)

Psychotherapy or Psychological counseling for managing Finding Meaning, Spiritual Concerns of family members/caregivers

- family members/caregivers of 0 ~ 14 or 15 years old patient (pediatric)
- family members/caregivers of 15 or 16 ~ 39 years old (adolescent/young adult)
- family members/caregivers of 40 ~ 65 years old (middle-aged adult)
- family members/caregivers of older than 65 years old (older adult)

---

Support Group or Forums for managing Finding Meaning, Spiritual Concerns of family members/caregivers

- family members/caregivers of 0 ~ 14 or 15 years old patient (pediatric)
- family members/caregivers of 15 or 16 ~ 39 years old (adolescent/young adult)
- family members/caregivers of 40 ~ 65 years old (middle-aged adult)
- family members/caregivers of older than 65 years old (older adult)

---

Booklets or Audio/Video Self-Help Materials for managing Finding Meaning, Spiritual Concerns of family members/caregivers

- family members/caregivers of 0 ~ 14 or 15 years old patient (pediatric)
- family members/caregivers of 15 or 16 ~ 39 years old (adolescent/young adult)
- family members/caregivers of 40 ~ 65 years old (middle-aged adult)
- family members/caregivers of older than 65 years old (older adult)

---

Pharmacologic service for managing Finding Meaning, Spiritual Concerns of family members/caregivers

- family members/caregivers of 0 ~ 14 or 15 years old patient (pediatric)
- family members/caregivers of 15 or 16 ~ 39 years old (adolescent/young adult)
- family members/caregivers of 40 ~ 65 years old (middle-aged adult)
- family members/caregivers of older than 65 years old (older adult)

---

"[q17\_1b5o]" for managing Finding Meaning, Spiritual Concerns of family members/caregivers

- family members/caregivers of 0 ~ 14 or 15 years old patient (pediatric)
- family members/caregivers of 15 or 16 ~ 39 years old (adolescent/young adult)
- family members/caregivers of 40 ~ 65 years old (middle-aged adult)
- family members/caregivers of older than 65 years old (older adult)

---

Psychotherapy or Psychological Counseling for managing Family Relationships (communication problems, conflict management, concerns about children or adolescents) of family members/caregivers

- family members/caregivers of 0 ~ 14 or 15 years old patient (pediatric)
- family members/caregivers of 15 or 16 ~ 39 years old (adolescent/young adult)
- family members/caregivers of 40 ~ 65 years old (middle-aged adult)
- family members/caregivers of older than 65 years old (older adult)

---

Support Group or Forums for managing Family Relationships (communication problems, conflict management, concerns about children or adolescents) of family members/caregivers

- family members/caregivers of 0 ~ 14 or 15 years old patient (pediatric)
- family members/caregivers of 15 or 16 ~ 39 years old (adolescent/young adult)
- family members/caregivers of 40 ~ 65 years old (middle-aged adult)
- family members/caregivers of older than 65 years old (older adult)

Booklets or Audio/Video Self-Help Materials for managing Family Relationships (communication problems, conflict management, concerns about children or adolescents) of family members/caregivers

- family members/caregivers of 0 ~ 14 or 15 years old patient (pediatric)
- family members/caregivers of 15 or 16 ~ 39 years old (adolescent/young adult)
- family members/caregivers of 40 ~ 65 years old (middle-aged adult)
- family members/caregivers of older than 65 years old (older adult)

Pharmacologic service for managing Family Relationships (communication problems, conflict management, concerns about children or adolescents) of family members/caregivers

- family members/caregivers of 0 ~ 14 or 15 years old patient (pediatric)
- family members/caregivers of 15 or 16 ~ 39 years old (adolescent/young adult)
- family members/caregivers of 40 ~ 65 years old (middle-aged adult)
- family members/caregivers of older than 65 years old (older adult)

"[q17\_1c5o]" for managing Family Relationships (communication problems, conflict management, concerns about children or adolescents) of family members/caregivers

- family members/caregivers of 0 ~ 14 or 15 years old patient (pediatric)
- family members/caregivers of 15 or 16 ~ 39 years old (adolescent/young adult)
- family members/caregivers of 40 ~ 65 years old (middle-aged adult)
- family members/caregivers of older than 65 years old (older adult)

Psychotherapy or Psychological Counseling for managing Sexuality, Intimacy of family members/caregivers

- family members/caregivers of 0 ~ 14 or 15 years old patient (pediatric)
- family members/caregivers of 15 or 16 ~ 39 years old (adolescent/young adult)
- family members/caregivers of 40 ~ 65 years old (middle-aged adult)
- family members/caregivers of older than 65 years old (older adult)

Support Group or Forums for managing Sexuality, Intimacy of family members/caregivers

- family members/caregivers of 0 ~ 14 or 15 years old patient (pediatric)
- family members/caregivers of 15 or 16 ~ 39 years old (adolescent/young adult)
- family members/caregivers of 40 ~ 65 years old (middle-aged adult)
- family members/caregivers of older than 65 years old (older adult)

Booklets or Audio/Video Self-Help Materials for managing Sexuality, Intimacy of family members/caregivers

- family members/caregivers of 0 ~ 14 or 15 years old patient (pediatric)
- family members/caregivers of 15 or 16 ~ 39 years old (adolescent/young adult)
- family members/caregivers of 40 ~ 65 years old (middle-aged adult)
- family members/caregivers of older than 65 years old (older adult)

---

Pharmacologic service for managing Sexuality, Intimacy of family members/caregivers

- family members/caregivers of 0 ~ 14 or 15 years old patient (pediatric)
- family members/caregivers of 15 or 16 ~ 39 years old (adolescent/young adult)
- family members/caregivers of 40 ~ 65 years old (middle-aged adult)
- family members/caregivers of older than 65 years old (older adult)

---

"[q17\_1d5o]" for managing Sexuality, Intimacy of family members/caregivers

- family members/caregivers of 0 ~ 14 or 15 years old patient (pediatric)
- family members/caregivers of 15 or 16 ~ 39 years old (adolescent/young adult)
- family members/caregivers of 40 ~ 65 years old (middle-aged adult)
- family members/caregivers of older than 65 years old (older adult)

---

Psychotherapy or Psychological Counseling for managing Social Relationships/Isolation of family members/caregivers

- family members/caregivers of 0 ~ 14 or 15 years old patient (pediatric)
- family members/caregivers of 15 or 16 ~ 39 years old (adolescent/young adult)
- family members/caregivers of 40 ~ 65 years old (middle-aged adult)
- family members/caregivers of older than 65 years old (older adult)

---

Support Group or Forums for managing Social Relationships/Isolation of family members/caregivers

- family members/caregivers of 0 ~ 14 or 15 years old patient (pediatric)
- family members/caregivers of 15 or 16 ~ 39 years old (adolescent/young adult)
- family members/caregivers of 40 ~ 65 years old (middle-aged adult)
- family members/caregivers of older than 65 years old (older adult)

---

Booklets or Audio/Video Self-Help Materials for managing Social Relationships/Isolation of family members/caregivers

- family members/caregivers of 0 ~ 14 or 15 years old patient (pediatric)
- family members/caregivers of 15 or 16 ~ 39 years old (adolescent/young adult)
- family members/caregivers of 40 ~ 65 years old (middle-aged adult)
- family members/caregivers of older than 65 years old (older adult)

---

Pharmacologic service for managing Social Relationships/Isolation of family members/caregivers

- family members/caregivers of 0 ~ 14 or 15 years old patient (pediatric)
- family members/caregivers of 15 or 16 ~ 39 years old (adolescent/young adult)
- family members/caregivers of 40 ~ 65 years old (middle-aged adult)
- family members/caregivers of older than 65 years old (older adult)

"[q17\_1e5o]" for managing Social Relationships/Isolation of family members/caregivers

- family members/caregivers of 0 ~ 14 or 15 years old patient (pediatric)
- family members/caregivers of 15 or 16 ~ 39 years old (adolescent/young adult)
- family members/caregivers of 40 ~ 65 years old (middle-aged adult)
- family members/caregivers of older than 65 years old (older adult)

Psychotherapy or Psychological Counseling for family members/caregivers managing Medical Care Related to Cancer

- family members/caregivers of 0 ~ 14 or 15 years old patient (pediatric)
- family members/caregivers of 15 or 16 ~ 39 years old (adolescent/young adult)
- family members/caregivers of 40 ~ 65 years old (middle-aged adult)
- family members/caregivers of older than 65 years old (older adult)

Support Group or Forums for family members/caregivers managing Medical Care Related to Cancer

- family members/caregivers of 0 ~ 14 or 15 years old patient (pediatric)
- family members/caregivers of 15 or 16 ~ 39 years old (adolescent/young adult)
- family members/caregivers of 40 ~ 65 years old (middle-aged adult)
- family members/caregivers of older than 65 years old (older adult)

Booklets or Audio/Video Self-Help Materials for family members/caregivers managing Medical Care Related to Cancer

- family members/caregivers of 0 ~ 14 or 15 years old patient (pediatric)
- family members/caregivers of 15 or 16 ~ 39 years old (adolescent/young adult)
- family members/caregivers of 40 ~ 65 years old (middle-aged adult)
- family members/caregivers of older than 65 years old (older adult)

Pharmacologic service for family members/caregivers managing Medical Care Related to Cancer

- family members/caregivers of 0 ~ 14 or 15 years old patient (pediatric)
- family members/caregivers of 15 or 16 ~ 39 years old (adolescent/young adult)
- family members/caregivers of 40 ~ 65 years old (middle-aged adult)
- family members/caregivers of older than 65 years old (older adult)

"[q17\_1f5o]" for family members/caregivers managing Medical Care Related to Cancer

- family members/caregivers of 0 ~ 14 or 15 years old patient (pediatric)
- family members/caregivers of 15 or 16 ~ 39 years old (adolescent/young adult)
- family members/caregivers of 40 ~ 65 years old (middle-aged adult)
- family members/caregivers of older than 65 years old (older adult)

---

Psychotherapy or Psychological Counseling for family members/caregivers managing Cancer-Related Symptoms

- family members/caregivers of 0 ~ 14 or 15 years old patient (pediatric)
- family members/caregivers of 15 or 16 ~ 39 years old (adolescent/young adult)
- family members/caregivers of 40 ~ 65 years old (middle-aged adult)
- family members/caregivers of older than 65 years old (older adult)

---

Support Group or Forums for family members/caregivers managing Cancer-Related Symptoms

- family members/caregivers of 0 ~ 14 or 15 years old patient (pediatric)
- family members/caregivers of 15 or 16 ~ 39 years old (adolescent/young adult)
- family members/caregivers of 40 ~ 65 years old (middle-aged adult)
- family members/caregivers of older than 65 years old (older adult)

---

Booklets or Audio/Video Self-Help Materials for family members/caregivers managing Cancer-Related Symptoms

- family members/caregivers of 0 ~ 14 or 15 years old patient (pediatric)
- family members/caregivers of 15 or 16 ~ 39 years old (adolescent/young adult)
- family members/caregivers of 40 ~ 65 years old (middle-aged adult)
- family members/caregivers of older than 65 years old (older adult)

---

Pharmacologic service for family members/caregivers managing Cancer-Related Symptoms

- family members/caregivers of 0 ~ 14 or 15 years old patient (pediatric)
- family members/caregivers of 15 or 16 ~ 39 years old (adolescent/young adult)
- family members/caregivers of 40 ~ 65 years old (middle-aged adult)
- family members/caregivers of older than 65 years old (older adult)

---

"[q17\_1g5o]" for managing Cancer-Related Symptoms of family members/caregivers

- family members/caregivers of 0 ~ 14 or 15 years old patient (pediatric)
- family members/caregivers of 15 or 16 ~ 39 years old (adolescent/young adult)
- family members/caregivers of 40 ~ 65 years old (middle-aged adult)
- family members/caregivers of older than 65 years old (older adult)

---

Psychotherapy or Psychological Counseling for managing Physical Functioning Decline of family members/caregivers

- family members/caregivers of 0 ~ 14 or 15 years old patient (pediatric)
- family members/caregivers of 15 or 16 ~ 39 years old (adolescent/young adult)
- family members/caregivers of 40 ~ 65 years old (middle-aged adult)
- family members/caregivers of older than 65 years old (older adult)

---

Support Group or Forums for managing Physical Functioning Decline of family members/caregivers

- family members/caregivers of 0 ~ 14 or 15 years old patient (pediatric)
- family members/caregivers of 15 or 16 ~ 39 years old (adolescent/young adult)
- family members/caregivers of 40 ~ 65 years old (middle-aged adult)
- family members/caregivers of older than 65 years old (older adult)

---

Booklets or Audio/Video Self-Help Materials for managing Physical Functioning Decline of family members/caregivers

- family members/caregivers of 0 ~ 14 or 15 years old patient (pediatric)
- family members/caregivers of 15 or 16 ~ 39 years old (adolescent/young adult)
- family members/caregivers of 40 ~ 65 years old (middle-aged adult)
- family members/caregivers of older than 65 years old (older adult)

---

Pharmacologic service for managing Physical Functioning Decline of family members/caregivers

- family members/caregivers of 0 ~ 14 or 15 years old patient (pediatric)
- family members/caregivers of 15 or 16 ~ 39 years old (adolescent/young adult)
- family members/caregivers of 40 ~ 65 years old (middle-aged adult)
- family members/caregivers of older than 65 years old (older adult)

---

"[q17\_1h5o]" for managing Physical Functioning Decline of family members/caregivers

- family members/caregivers of 0 ~ 14 or 15 years old patient (pediatric)
- family members/caregivers of 15 or 16 ~ 39 years old (adolescent/young adult)
- family members/caregivers of 40 ~ 65 years old (middle-aged adult)
- family members/caregivers of older than 65 years old (older adult)

---

Psychotherapy or Psychological Counseling for managing Cognitive Functioning Decline

- family members/caregivers of 0 ~ 14 or 15 years old patient (pediatric)
- family members/caregivers of 15 or 16 ~ 39 years old (adolescent/young adult)
- family members/caregivers of 40 ~ 65 years old (middle-aged adult)
- family members/caregivers of older than 65 years old (older adult)

---

Support Group or Forums for managing Cognitive Functioning Decline of family members/caregivers

- family members/caregivers of 0 ~ 14 or 15 years old patient (pediatric)
- family members/caregivers of 15 or 16 ~ 39 years old (adolescent/young adult)
- family members/caregivers of 40 ~ 65 years old (middle-aged adult)
- family members/caregivers of older than 65 years old (older adult)



Booklets or Audio/Video Self-Help Materials for managing Cognitive Functioning Decline of family members/caregivers

- family members/caregivers of 0 ~ 14 or 15 years old patient (pediatric)
- family members/caregivers of 15 or 16 ~ 39 years old (adolescent/young adult)
- family members/caregivers of 40 ~ 65 years old (middle-aged adult)
- family members/caregivers of older than 65 years old (older adult)

Pharmacologic service for managing Cognitive Functioning Decline of family members/caregivers

- family members/caregivers of 0 ~ 14 or 15 years old patient (pediatric)
- family members/caregivers of 15 or 16 ~ 39 years old (adolescent/young adult)
- family members/caregivers of 40 ~ 65 years old (middle-aged adult)
- family members/caregivers of older than 65 years old (older adult)

"[q17\_i5o]" for managing Cognitive Functioning Decline of family members/caregivers

- family members/caregivers of 0 ~ 14 or 15 years old patient (pediatric)
- family members/caregivers of 15 or 16 ~ 39 years old (adolescent/young adult)
- family members/caregivers of 40 ~ 65 years old (middle-aged adult)
- family members/caregivers of older than 65 years old (older adult)

Psychotherapy or Psychological Counseling for managing Insomnia, Sleep Difficulty, Fatigue of family members/caregivers

- family members/caregivers of 0 ~ 14 or 15 years old patient (pediatric)
- family members/caregivers of 15 or 16 ~ 39 years old (adolescent/young adult)
- family members/caregivers of 40 ~ 65 years old (middle-aged adult)
- family members/caregivers of older than 65 years old (older adult)

Support Group or Forums for managing Insomnia, Sleep Difficulty, Fatigue of family members/caregivers

- family members/caregivers of 0 ~ 14 or 15 years old patient (pediatric)
- family members/caregivers of 15 or 16 ~ 39 years old (adolescent/young adult)
- family members/caregivers of 40 ~ 65 years old (middle-aged adult)
- family members/caregivers of older than 65 years old (older adult)

Booklets or Audio/Video Self-Help Materials for managing Insomnia, Sleep Difficulty, Fatigue of family members/caregivers

- family members/caregivers of 0 ~ 14 or 15 years old patient (pediatric)
- family members/caregivers of 15 or 16 ~ 39 years old (adolescent/young adult)
- family members/caregivers of 40 ~ 65 years old (middle-aged adult)
- family members/caregivers of older than 65 years old (older adult)

Pharmacologic service for managing Insomnia, Sleep Difficulty, Fatigue of family members/caregivers

- family members/caregivers of 0 ~ 14 or 15 years old patient (pediatric)
- family members/caregivers of 15 or 16 ~ 39 years old (adolescent/young adult)
- family members/caregivers of 40 ~ 65 years old (middle-aged adult)
- family members/caregivers of older than 65 years old (older adult)

"[q17\_1j5o]" for managing Insomnia, Sleep Difficulty, Fatigue of family members/caregivers

- family members/caregivers of 0 ~ 14 or 15 years old patient (pediatric)
- family members/caregivers of 15 or 16 ~ 39 years old (adolescent/young adult)
- family members/caregivers of 40 ~ 65 years old (middle-aged adult)
- family members/caregivers of older than 65 years old (older adult)

Psychotherapy or Psychological Counseling for family members/caregivers managing Financial Concern Stemming from Cancer Care

- family members/caregivers of 0 ~ 14 or 15 years old patient (pediatric)
- family members/caregivers of 15 or 16 ~ 39 years old (adolescent/young adult)
- family members/caregivers of 40 ~ 65 years old (middle-aged adult)
- family members/caregivers of older than 65 years old (older adult)

Support Group or Forums for family members/caregivers managing Financial Concern Stemming from Cancer Care

- family members/caregivers of 0 ~ 14 or 15 years old patient (pediatric)
- family members/caregivers of 15 or 16 ~ 39 years old (adolescent/young adult)
- family members/caregivers of 40 ~ 65 years old (middle-aged adult)
- family members/caregivers of older than 65 years old (older adult)

Booklets or Audio/Video Self-Help Materials for family members/caregivers managing Financial Concern Stemming from Cancer Care

- family members/caregivers of 0 ~ 14 or 15 years old patient (pediatric)
- family members/caregivers of 15 or 16 ~ 39 years old (adolescent/young adult)
- family members/caregivers of 40 ~ 65 years old (middle-aged adult)
- family members/caregivers of older than 65 years old (older adult)

Pharmacologic service for family members/caregivers managing Financial Concern Stemming from Cancer Care

- family members/caregivers of 0 ~ 14 or 15 years old patient (pediatric)
- family members/caregivers of 15 or 16 ~ 39 years old (adolescent/young adult)
- family members/caregivers of 40 ~ 65 years old (middle-aged adult)
- family members/caregivers of older than 65 years old (older adult)

"[q17\_1k5o]" for family members/caregivers managing Financial Concern Stemming from Cancer Care

- family members/caregivers of 0 ~ 14 or 15 years old patient (pediatric)
- family members/caregivers of 15 or 16 ~ 39 years old (adolescent/young adult)
- family members/caregivers of 40 ~ 65 years old (middle-aged adult)
- family members/caregivers of older than 65 years old (older adult)

Psychotherapy or Psychological Counseling for managing Personal Care for Daily Living of family members/caregivers

- family members/caregivers of 0 ~ 14 or 15 years old patient (pediatric)
- family members/caregivers of 15 or 16 ~ 39 years old (adolescent/young adult)
- family members/caregivers of 40 ~ 65 years old (middle-aged adult)
- family members/caregivers of older than 65 years old (older adult)

Support Group or Forums for managing Personal Care for Daily Living of family members/caregivers

- family members/caregivers of 0 ~ 14 or 15 years old patient (pediatric)
- family members/caregivers of 15 or 16 ~ 39 years old (adolescent/young adult)
- family members/caregivers of 40 ~ 65 years old (middle-aged adult)
- family members/caregivers of older than 65 years old (older adult)

Booklets or Audio/Video Self-Help Materials for managing Personal Care for Daily Living of family members/caregivers

- family members/caregivers of 0 ~ 14 or 15 years old patient (pediatric)
- family members/caregivers of 15 or 16 ~ 39 years old (adolescent/young adult)
- family members/caregivers of 40 ~ 65 years old (middle-aged adult)
- family members/caregivers of older than 65 years old (older adult)

Pharmacologic service for managing Personal Care for Daily Living of family members/caregivers

- family members/caregivers of 0 ~ 14 or 15 years old patient (pediatric)
- family members/caregivers of 15 or 16 ~ 39 years old (adolescent/young adult)
- family members/caregivers of 40 ~ 65 years old (middle-aged adult)
- family members/caregivers of older than 65 years old (older adult)

"[q17\_1l5o]" for managing Personal Care for Daily Living of family members/caregivers

- family members/caregivers of 0 ~ 14 or 15 years old patient (pediatric)
- family members/caregivers of 15 or 16 ~ 39 years old (adolescent/young adult)
- family members/caregivers of 40 ~ 65 years old (middle-aged adult)
- family members/caregivers of older than 65 years old (older adult)

---

Psychotherapy or Psychological Counseling for managing Balancing Other Social Roles with a New Role as a Family Caregiver

- family members/caregivers of 0 ~ 14 or 15 years old patient (pediatric)
- family members/caregivers of 15 or 16 ~ 39 years old (adolescent/young adult)
- family members/caregivers of 40 ~ 65 years old (middle-aged adult)
- family members/caregivers of older than 65 years old (older adult)

---

Support Group or Forums for managing Balancing Other Social Roles with a New Role as a Family Caregiver

- family members/caregivers of 0 ~ 14 or 15 years old patient (pediatric)
- family members/caregivers of 15 or 16 ~ 39 years old (adolescent/young adult)
- family members/caregivers of 40 ~ 65 years old (middle-aged adult)
- family members/caregivers of older than 65 years old (older adult)

---

Booklets or Audio/Video Self-Help Materials for managing Balancing Other Social Roles with a New Role as a Family Caregiver

- family members/caregivers of 0 ~ 14 or 15 years old patient (pediatric)
- family members/caregivers of 15 or 16 ~ 39 years old (adolescent/young adult)
- family members/caregivers of 40 ~ 65 years old (middle-aged adult)
- family members/caregivers of older than 65 years old (older adult)

---

Pharmacologic service for managing Balancing Other Social Roles with a New Role as a Family Caregiver

- family members/caregivers of 0 ~ 14 or 15 years old patient (pediatric)
- family members/caregivers of 15 or 16 ~ 39 years old (adolescent/young adult)
- family members/caregivers of 40 ~ 65 years old (middle-aged adult)
- family members/caregivers of older than 65 years old (older adult)

---

"[q17\_1m5o]" for managing Balancing Other Social Roles with a New Role as a Family Caregiver

- family members/caregivers of 0 ~ 14 or 15 years old patient (pediatric)
- family members/caregivers of 15 or 16 ~ 39 years old (adolescent/young adult)
- family members/caregivers of 40 ~ 65 years old (middle-aged adult)
- family members/caregivers of older than 65 years old (older adult)

---

Psychotherapy or Psychological Counseling for managing Grief/bereavement of family members/caregivers

- family members/caregivers of 0 ~ 14 or 15 years old patient (pediatric)
- family members/caregivers of 15 or 16 ~ 39 years old (adolescent/young adult)
- family members/caregivers of 40 ~ 65 years old (middle-aged adult)
- family members/caregivers of older than 65 years old (older adult)

---

Support Group or Forums for managing Grief/bereavement of family members/caregivers

- family members/caregivers of 0 ~ 14 or 15 years old patient (pediatric)
- family members/caregivers of 15 or 16 ~ 39 years old (adolescent/young adult)
- family members/caregivers of 40 ~ 65 years old (middle-aged adult)
- family members/caregivers of older than 65 years old (older adult)

---

Booklets or Audio/Video Self-Help Materials for managing Grief/bereavement of family members/caregivers

- family members/caregivers of 0 ~ 14 or 15 years old patient (pediatric)
- family members/caregivers of 15 or 16 ~ 39 years old (adolescent/young adult)
- family members/caregivers of 40 ~ 65 years old (middle-aged adult)
- family members/caregivers of older than 65 years old (older adult)

---

Pharmacologic service for managing Grief/bereavement of family members/caregivers

- family members/caregivers of 0 ~ 14 or 15 years old patient (pediatric)
- family members/caregivers of 15 or 16 ~ 39 years old (adolescent/young adult)
- family members/caregivers of 40 ~ 65 years old (middle-aged adult)
- family members/caregivers of older than 65 years old (older adult)

---

"[q17\_1x5o]" for managing Grief/bereavement of family members/caregivers

- family members/caregivers of 0 ~ 14 or 15 years old patient (pediatric)
- family members/caregivers of 15 or 16 ~ 39 years old (adolescent/young adult)
- family members/caregivers of 40 ~ 65 years old (middle-aged adult)
- family members/caregivers of older than 65 years old (older adult)

---

Psychotherapy or Psychological Counseling for managing "[q12\_1an1]" of family members/caregivers

- family members/caregivers of 0 ~ 14 or 15 years old patient (pediatric)
- family members/caregivers of 15 or 16 ~ 39 years old (adolescent/young adult)
- family members/caregivers of 40 ~ 65 years old (middle-aged adult)
- family members/caregivers of older than 65 years old (older adult)

---

Support Group or Forums for managing "[q12\_1an1]" of family members/caregivers

- family members/caregivers of 0 ~ 14 or 15 years old patient (pediatric)
- family members/caregivers of 15 or 16 ~ 39 years old (adolescent/young adult)
- family members/caregivers of 40 ~ 65 years old (middle-aged adult)
- family members/caregivers of older than 65 years old (older adult)

---

Booklets or Audio/Video Self-Help Materials for managing "[q12\_1an1]" of family members/caregivers

- family members/caregivers of 0 ~ 14 or 15 years old patient (pediatric)
- family members/caregivers of 15 or 16 ~ 39 years old (adolescent/young adult)
- family members/caregivers of 40 ~ 65 years old (middle-aged adult)
- family members/caregivers of older than 65 years old (older adult)

---

Pharmacologic service for managing "[q12\_1an1]" of family members/caregivers

- family members/caregivers of 0 ~ 14 or 15 years old patient (pediatric)
- family members/caregivers of 15 or 16 ~ 39 years old (adolescent/young adult)
- family members/caregivers of 40 ~ 65 years old (middle-aged adult)
- family members/caregivers of older than 65 years old (older adult)

---

"[q17\_1n5o]" for managing "[q12\_1an1]" of family members/caregivers

- family members/caregivers of 0 ~ 14 or 15 years old patient (pediatric)
- family members/caregivers of 15 or 16 ~ 39 years old (adolescent/young adult)
- family members/caregivers of 40 ~ 65 years old (middle-aged adult)
- family members/caregivers of older than 65 years old (older adult)

---

Psychotherapy or Psychological Counseling for managing "[q12\_1ao1]" of family members/caregivers

- family members/caregivers of 0 ~ 14 or 15 years old patient (pediatric)
- family members/caregivers of 15 or 16 ~ 39 years old (adolescent/young adult)
- family members/caregivers of 40 ~ 65 years old (middle-aged adult)
- family members/caregivers of older than 65 years old (older adult)

---

Support Group or Forums for managing "[q12\_1ao1]" of family members/caregivers

- family members/caregivers of 0 ~ 14 or 15 years old patient (pediatric)
- family members/caregivers of 15 or 16 ~ 39 years old (adolescent/young adult)
- family members/caregivers of 40 ~ 65 years old (middle-aged adult)
- family members/caregivers of older than 65 years old (older adult)

---

Booklets or Audio/Video Self-Help Materials for managing "[q12\_1ao1]" of family members/caregivers

- family members/caregivers of 0 ~ 14 or 15 years old patient (pediatric)
- family members/caregivers of 15 or 16 ~ 39 years old (adolescent/young adult)
- family members/caregivers of 40 ~ 65 years old (middle-aged adult)
- family members/caregivers of older than 65 years old (older adult)

---

Pharmacologic service for managing "[q12\_1ao1]" of family members/caregivers

- family members/caregivers of 0 ~ 14 or 15 years old patient (pediatric)
- family members/caregivers of 15 or 16 ~ 39 years old (adolescent/young adult)
- family members/caregivers of 40 ~ 65 years old (middle-aged adult)
- family members/caregivers of older than 65 years old (older adult)

---

"[q17\_1o5o]" for managing "[q12\_1ao1]" of family members/caregivers

- family members/caregivers of 0 ~ 14 or 15 years old patient (pediatric)
- family members/caregivers of 15 or 16 ~ 39 years old (adolescent/young adult)
- family members/caregivers of 40 ~ 65 years old (middle-aged adult)
- family members/caregivers of older than 65 years old (older adult)

---

Psychotherapy or Psychological Counseling for managing "[q12\_1ap1]" of family members/caregivers

- family members/caregivers of 0 ~ 14 or 15 years old patient (pediatric)
- family members/caregivers of 15 or 16 ~ 39 years old (adolescent/young adult)
- family members/caregivers of 40 ~ 65 years old (middle-aged adult)
- family members/caregivers of older than 65 years old (older adult)

---

Support Group or Forums for managing "[q12\_1ap1]" of family members/caregivers

- family members/caregivers of 0 ~ 14 or 15 years old patient (pediatric)
- family members/caregivers of 15 or 16 ~ 39 years old (adolescent/young adult)
- family members/caregivers of 40 ~ 65 years old (middle-aged adult)
- family members/caregivers of older than 65 years old (older adult)

---

Booklets or Audio/Video Self-Help Materials for managing "[q12\_1ap1]" of family members/caregivers

- family members/caregivers of 0 ~ 14 or 15 years old patient (pediatric)
- family members/caregivers of 15 or 16 ~ 39 years old (adolescent/young adult)
- family members/caregivers of 40 ~ 65 years old (middle-aged adult)
- family members/caregivers of older than 65 years old (older adult)

---

Pharmacologic service for managing "[q12\_1ap1]" of family members/caregivers

- family members/caregivers of 0 ~ 14 or 15 years old patient (pediatric)
- family members/caregivers of 15 or 16 ~ 39 years old (adolescent/young adult)
- family members/caregivers of 40 ~ 65 years old (middle-aged adult)
- family members/caregivers of older than 65 years old (older adult)



---

"[q17\_1p5o]" for managing "[q12\_1ap1]" of family members/caregivers

- family members/caregivers of 0 ~ 14 or 15 years old patient (pediatric)
- family members/caregivers of 15 or 16 ~ 39 years old (adolescent/young adult)
- family members/caregivers of 40 ~ 65 years old (middle-aged adult)
- family members/caregivers of older than 65 years old (older adult)

---

Psychotherapy or Psychological Counseling for managing "[q12\_1aq1]" of family members/caregivers

- family members/caregivers of 0 ~ 14 or 15 years old patient (pediatric)
- family members/caregivers of 15 or 16 ~ 39 years old (adolescent/young adult)
- family members/caregivers of 40 ~ 65 years old (middle-aged adult)
- family members/caregivers of older than 65 years old (older adult)

---

Support Group or Forums for managing "[q12\_1aq1]" of family members/caregivers

- family members/caregivers of 0 ~ 14 or 15 years old patient (pediatric)
- family members/caregivers of 15 or 16 ~ 39 years old (adolescent/young adult)
- family members/caregivers of 40 ~ 65 years old (middle-aged adult)
- family members/caregivers of older than 65 years old (older adult)

---

Booklets or Audio/Video Self-Help Materials for managing "[q12\_1aq1]" of family members/caregivers

- family members/caregivers of 0 ~ 14 or 15 years old patient (pediatric)
- family members/caregivers of 15 or 16 ~ 39 years old (adolescent/young adult)
- family members/caregivers of 40 ~ 65 years old (middle-aged adult)
- family members/caregivers of older than 65 years old (older adult)

---

Pharmacologic service for managing "[q12\_1aq1]" of family members/caregivers

- family members/caregivers of 0 ~ 14 or 15 years old patient (pediatric)
- family members/caregivers of 15 or 16 ~ 39 years old (adolescent/young adult)
- family members/caregivers of 40 ~ 65 years old (middle-aged adult)
- family members/caregivers of older than 65 years old (older adult)

---

"[q17\_1q12o]" for managing "[q12\_1aq1]" of family members/caregivers

- family members/caregivers of 0 ~ 14 or 15 years old patient (pediatric)
- family members/caregivers of 15 or 16 ~ 39 years old (adolescent/young adult)
- family members/caregivers of 40 ~ 65 years old (middle-aged adult)
- family members/caregivers of older than 65 years old (older adult)



---

Psychotherapy or Psychological Counseling for managing "[q12\_1ar1]" of family members/caregivers

- family members/caregivers of 0 ~ 14 or 15 years old patient (pediatric)
- family members/caregivers of 15 or 16 ~ 39 years old (adolescent/young adult)
- family members/caregivers of 40 ~ 65 years old (middle-aged adult)
- family members/caregivers of older than 65 years old (older adult)

---

Support Group or Forums for managing "[q12\_1ar1]" of family members/caregivers

- family members/caregivers of 0 ~ 14 or 15 years old patient (pediatric)
- family members/caregivers of 15 or 16 ~ 39 years old (adolescent/young adult)
- family members/caregivers of 40 ~ 65 years old (middle-aged adult)
- family members/caregivers of older than 65 years old (older adult)

---

Booklets or Audio/Video Self-Help Materials for managing "[q12\_1ar1]" of family members/caregivers

- family members/caregivers of 0 ~ 14 or 15 years old patient (pediatric)
- family members/caregivers of 15 or 16 ~ 39 years old (adolescent/young adult)
- family members/caregivers of 40 ~ 65 years old (middle-aged adult)
- family members/caregivers of older than 65 years old (older adult)

---

Pharmacologic service for managing "[q12\_1ar1]" of family members/caregivers

- family members/caregivers of 0 ~ 14 or 15 years old patient (pediatric)
- family members/caregivers of 15 or 16 ~ 39 years old (adolescent/young adult)
- family members/caregivers of 40 ~ 65 years old (middle-aged adult)
- family members/caregivers of older than 65 years old (older adult)

---

"[q17\_1r5o]" for managing "[q12\_1ar1]" of family members/caregivers

- family members/caregivers of 0 ~ 14 or 15 years old patient (pediatric)
- family members/caregivers of 15 or 16 ~ 39 years old (adolescent/young adult)
- family members/caregivers of 40 ~ 65 years old (middle-aged adult)
- family members/caregivers of older than 65 years old (older adult)

## Section 8. Respondent Information

Q18. Your discipline is (check as many as apply)

Counselor, Clergy/Pastoral

Counselor, Mental Health

Counselor Rehabilitation

Nurse

Patient Advocate

Physician, Psychiatrist

Physician, Oncologist

Physician, Other

Public Health

Psychologist, Clinical

Psychologist, Research

Social Worker

Therapist, Art

Therapist, Grief

Therapist, Marital/Family (MFT)

Therapist, Music

Therapist, Sex

Other

Specify other

\_\_\_\_\_

Q19. In what country are you practicing/doing research (write name of the country)?

\_\_\_\_\_

---

Q20. Name of your institution

\_\_\_\_\_

---

Q21. Your gender is

- Male
- Female
- Prefer Not to Answer

---

Q22. Your Age Is

- 21-30
- 31-40
- 41-50
- 51-60
- 61-70
- 71-80
- >81

---

Q23. If you have any comments, please write them here

\_\_\_\_\_
